# Supplementary material for: Stereoregular cyclic p-tolyl-siloxanes with alkyl, O- and N-containing groups as promising reagents for the synthesis of functionalized organosiloxanes
Source: Royal Society of Chemistry journal article supplement (doi:10.1039/d1nj01222c), 2021-01-01
Supplement: d1nj01222c1.pdf [file d1nj01222c1.pdf]

## SUPPLEMENTARY INFORMATION

### **Stereoregular cyclic *p*-tolyl-siloxanes with alkyl, O- and N-containing groups as promising reagents for synthesis functionalized organosiloxanes**

*Dmitry N. Kholodkov,<sup>a</sup> Kseniia I. Eremchuk,<sup>a,b</sup> Yuri V. Soldatkin,<sup>a,c</sup> Alexander D. Volodin,<sup>a</sup> Alexander A. Korlyukov,<sup>a</sup> Roman A. Novikov,<sup>d</sup> Anton A. Anisimov,<sup>a</sup> Ashot V. Arzumanyan,<sup>a,\*</sup>*

<sup>a</sup> *Nesmeyanov Institute of Organoelement Compounds, Russian Academy of Sciences, 28 Vavilov Street, Moscow 119991, Russian Federation*

<sup>b</sup> *Korea Advanced Institute of Science and Technology, Daejeon 34141, Republic of Korea*

<sup>c</sup> *Lomonosov Moscow State University, 1 Kolmogorova street, Moscow 119991, Russian Federation*

<sup>d</sup> *Zelinsky Institute of Organic Chemistry, Russian Academy of Sciences, 47 Leninsky Pr., Moscow 119991, Russian Federation*

*\* Corresponding author. E-mail address: aav@ineos.ac.ru (A.V. Arzumanyan)*

## Table of contents:

| <b>№</b> | <b>Description</b>                                                                                                                     | <b>Page</b> |
|----------|----------------------------------------------------------------------------------------------------------------------------------------|-------------|
| S1       | Materials and methods                                                                                                                  | S3          |
| S2       | Screening of reaction conditions for the compound <b>3b</b>                                                                            | S4          |
| S3       | Methods of synthesis and characterization data for <b>1 and 3a-g</b>                                                                   | S12         |
| S4       | <sup>1</sup> H, <sup>13</sup> C and <sup>29</sup> Si, HSQC, HMBC and HSQMBC NMR, IR, GPC, ESI-<br>HRMS, and X-Ray of <b>1 and 3a-g</b> | S22         |
| S5       | References                                                                                                                             | S93         |

# S1. Materials and methods

All the starting materials were purchased from Acros and Sigma Aldrich company. Solvents were dried and purified according to standard procedures, *n*-butanol was purchased from PanReac and used without further purification. Allyl ethers of ethylene glycols were used freshly distilled, as long storage negatively affected the hydrosilylation.

<sup>1</sup>H, <sup>13</sup>C, <sup>29</sup>Si, HSQC, HMBC, HSQMBC and <sup>1</sup>H DOSY NMR spectra were recorded using a Bruker Avance 400 NMR spectrometer in CDCl<sub>3</sub>, chemical shifts are referenced to residual chloroform (7.26 ppm, <sup>1</sup>H). Chemical shifts are reported in ppm, multiplicities are indicated by s (singlet), d (doublet), m (multiplet).

High-resolution mass spectra were recorded on Bruker maXis QTOF (tandem quadrupole/time-of-flight mass analyzer) mass spectrometer equipped with an ESI source. The *m/z* scanning range was 100–3000. External calibration of the mass scale was carried out using a low-concentration calibration solution “Tuning mix” (Agilent Technologies). The data were processed using the Bruker Data Analysis 4.0 software.

Single crystal X-ray study of compound **1** was carried out in Center for molecule composition studies of INEOS RAS with Bruker APEX-II CCD at 120K.

IR spectra were obtained using an IR spectrometer with a Fourier transformer Shimadzu IRTracer100. Spectra were taken from thin films for liquids or from pills for solids.

GPC analysis was performed on the "Shimadzu" (Japan, Germany), the detector - refractometer RID - 20 Å, the column – Phenogel 5u 500 Å (Size (300 x 7,8 mm)); standart – polystyrene, eluent – THF; temperature – 40°C; speed of flow 1ml/min. Single crystal X-ray study of compound **3** was carried out in Center for molecule composition studies of INEOS RAS with Bruker APEX-II CCD at 120K.

## **S2. Screening of reaction conditions for the compound 3b**

Table S1. The effect of alkene loading <sup>a</sup>

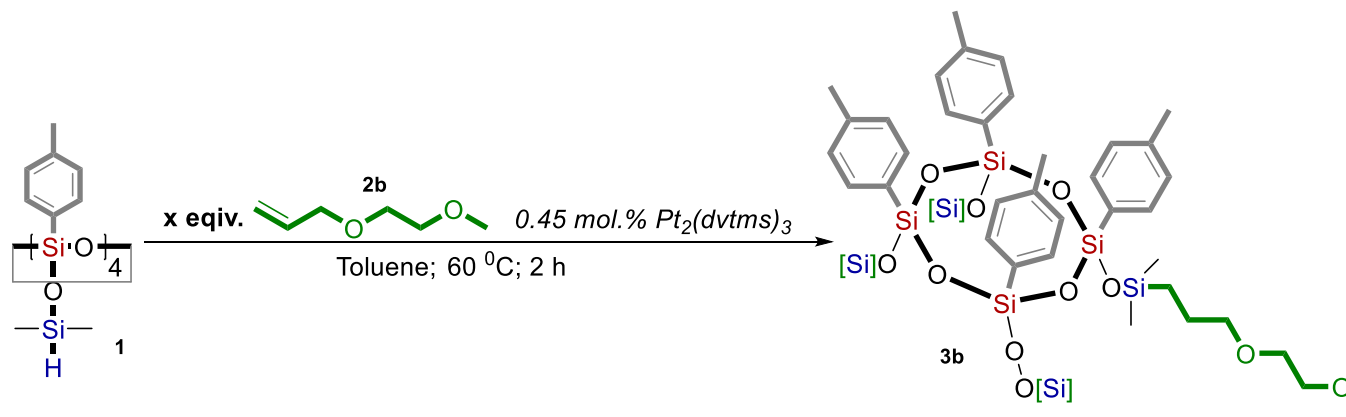

| x equiv., 2b                                                                                                                               | 4  | 4.4 | 6   | 8   |
|--------------------------------------------------------------------------------------------------------------------------------------------|----|-----|-----|-----|
| Conversion of [Si]-H, %                                                                                                                    | 98 | 100 | 100 | 100 |
| Conversion of [Si]-H - to [Si]-CH <sub>2</sub> CH <sub>2</sub> CH <sub>2</sub> OC <sub>2</sub> H <sub>4</sub> OCH <sub>3</sub> - groups, % | 65 | 72  | 94  | 94  |

<sup>a</sup>Reaction conditions: **1** (0.03 mmol, 1 eq.), **2b** (0.12—0.24 mmol, 4—8 eq.), Toluene (0.25 mL) and Karstedt's catalyst (Pt<sub>2</sub>(dvtms)<sub>3</sub>, 0.45 mol %, 3 mL) were stirred in Schott culture tubes (H × diam. 100 mm × 10 mm) at 60 °C for 2 h. The conversion of [Si]-H to [Si]-CH<sub>2</sub>CH<sub>2</sub>CH<sub>2</sub>OC<sub>2</sub>H<sub>4</sub>OCH<sub>3</sub> - groups was determined by <sup>1</sup>H NMR spectra.

Table S2. The effect of catalyst loading <sup>a</sup>

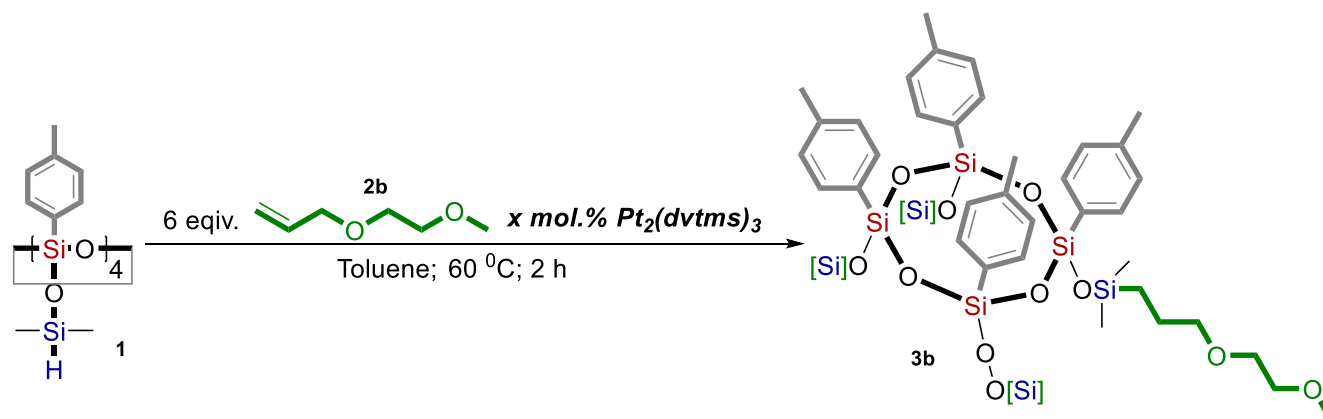

| x mol % $Pt_2(dvtms)_3$                                                 | 0.45            | 0.225 | 0.045 |
|-------------------------------------------------------------------------|-----------------|-------|-------|
| Conversion of $[Si]-H$ , %                                              | 100             | 100   | 100   |
| Conversion of $[Si]-H$ - to $[Si]-CH_2CH_2CH_2OC_2H_4OCH_3$ - groups, % | 94 <sup>b</sup> | 93    | 93    |

<sup>a</sup>Reaction conditions: **1** (0.03 mmol, 1 eq.), **2b** (0.18 mmol, 6 eq.), Toluene (0.25 mL) and Karstedt's catalyst ( $Pt_2(dvtms)_3$ , 0.045—0.45 mol %, 3 mL) were stirred in Schott culture tubes (H × diam. 100 mm × 10 mm) at 60 °C for 2 h. The conversion of  $[Si]-H$  to  $[Si]-CH_2CH_2CH_2OC_2H_4OCH_3$  - groups was determined by <sup>1</sup>H NMR spectra. <sup>b</sup>It has been shown that a 10-fold decrease in the catalyst loading - from 0.45 to 0.045 mol% - makes it possible to carry out this process with high efficiency; however, a loading of 0.45 mol% was chosen with a margin for the convenience of loading the catalyst, as well as transferring the reaction conditions to less reactive substrates. Reduced catalyst loading have been used in scaling up the process (see Table S6).

Table S3. The effect of solvent loading <sup>a</sup>

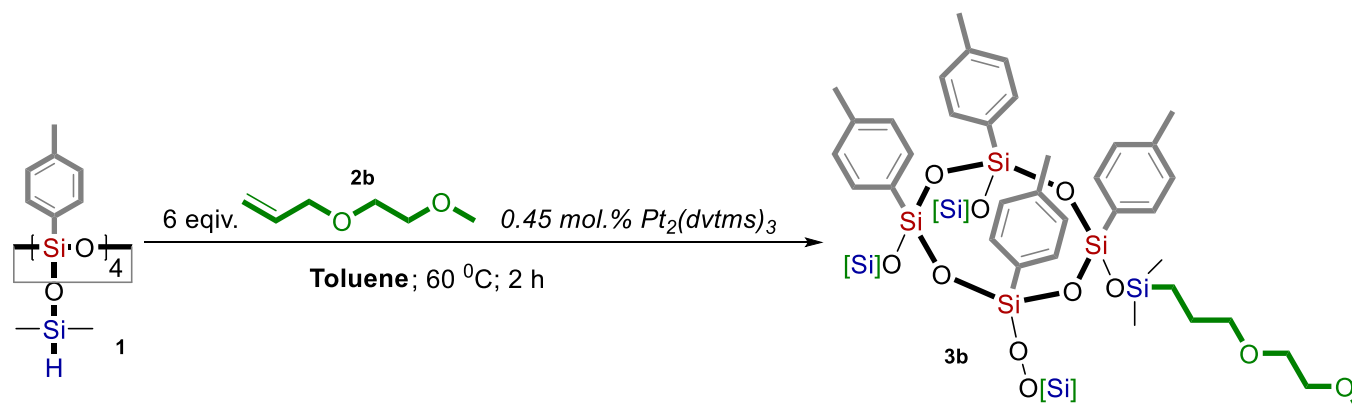

| Toluene, mL                                                                                                                            | 0   | 0.1 | 0.25 | 0.5 | 1   |
|----------------------------------------------------------------------------------------------------------------------------------------|-----|-----|------|-----|-----|
| Conversion of $[\text{Si}]-\text{H}$ , %                                                                                               | 100 | 100 | 100  | 100 | 100 |
| Conversion of $[\text{Si}]-\text{H}$ - to $[\text{Si}]-\text{CH}_2\text{CH}_2\text{CH}_2\text{OC}_2\text{H}_4\text{OCH}_3$ - groups, % | 90  | 90  | 94   | 94  | 94  |

<sup>a</sup>Reaction conditions: **1** (0.03 mmol, 1 eq.), **2b** (0.18 mmol, 6 eq.), Toluene (0—1 mL) and Karstedt's catalyst ( $\text{Pt}_2(\text{dvtms})_3$ , 0.45 mol %, 3 mL) were stirred in Schott culture tubes (H × diam. 100 mm × 10 mm) at 60 °C for 2 h. The conversion of  $[\text{Si}]-\text{H}$  to  $[\text{Si}]-\text{CH}_2\text{CH}_2\text{CH}_2\text{OC}_2\text{H}_4\text{OCH}_3$  - groups was determined by <sup>1</sup>H NMR spectra.

Table S4. The effect of temperature <sup>a</sup>

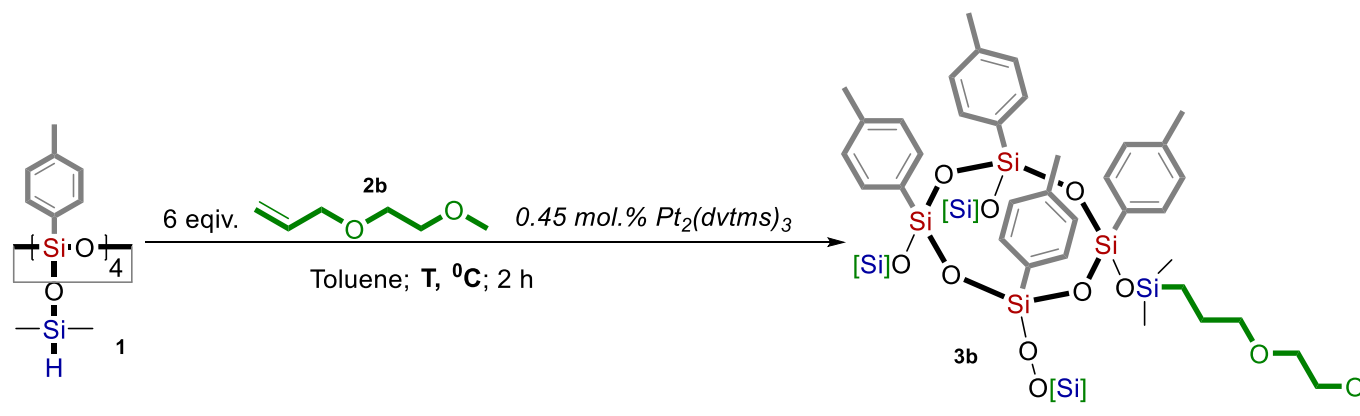

| <b>T, °C</b>                                                                                                                           | <b>25</b> | <b>40</b> | <b>60</b> |
|----------------------------------------------------------------------------------------------------------------------------------------|-----------|-----------|-----------|
| Conversion of $[\text{Si}]-\text{H}$ , %                                                                                               | 100       | 100       | 100       |
| Conversion of $[\text{Si}]-\text{H}$ - to $[\text{Si}]-\text{CH}_2\text{CH}_2\text{CH}_2\text{OC}_2\text{H}_4\text{OCH}_3$ - groups, % | 89        | 91        | 94        |

<sup>a</sup>Reaction conditions: **1** (0.03 mmol, 1 eq.), **2a** (0.18 mmol, 6 eq.), Toluene (0.25 mL) and Karstedt's catalyst ( $\text{Pt}_2(\text{dvtms})_3$ , 0.45 mol %, 3 mL) were stirred in Schott culture tubes (H × diam. 100 mm × 10 mm) at 25–60 °C for 2 h. The conversion of  $[\text{Si}]-\text{H}$  to  $[\text{Si}]-\text{CH}_2\text{CH}_2\text{CH}_2\text{OC}_2\text{H}_4\text{OCH}_3$  - groups was determined by <sup>1</sup>H NMR spectra.



Table S5. The effect of reaction time <sup>a</sup>

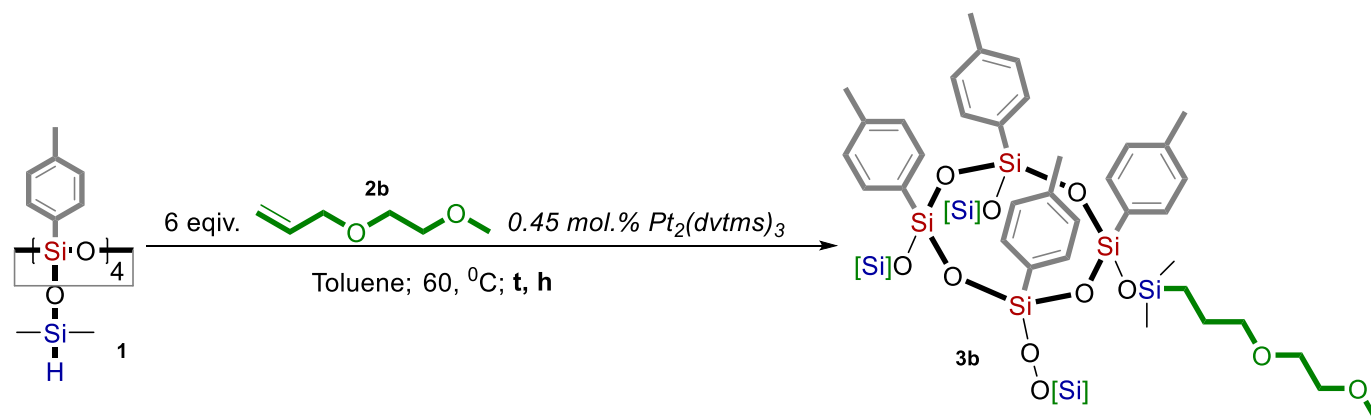

| t, h                                                                    | 0.5 | 1   | 2   | 6   | 16 <sup>b</sup> |
|-------------------------------------------------------------------------|-----|-----|-----|-----|-----------------|
| Conversion of $[Si]-H$ , %                                              | 100 | 100 | 100 | 100 | 100             |
| Conversion of $[Si]-H$ - to $[Si]-CH_2CH_2CH_2OC_2H_4OCH_3$ - groups, % | 91  | 92  | 94  | 94  | 94              |

<sup>a</sup>Reaction conditions: **1** (0.03 mmol, 1 eq.), **2b** (0.18 mmol, 6 eq.), Toluene (0.25 mL) and Karstedt's catalyst ( $Pt_2(dvtms)_3$ , 0.45 mol %, 3 mL) were stirred in Schott culture tubes (H × diam. 100 mm × 10 mm) at 60 °C for 0.5–6 h. The conversion of  $[Si]-H$  to  $[Si]-CH_2CH_2CH_2OC_2H_4OCH_3$  - groups was determined by <sup>1</sup>H NMR spectra. <sup>b</sup>Karstedt's catalyst ( $Pt_2(dvtms)_3$ , 0.1 mol %, 0.7 mL)

Table S6. The effect of scaling <sup>a</sup>

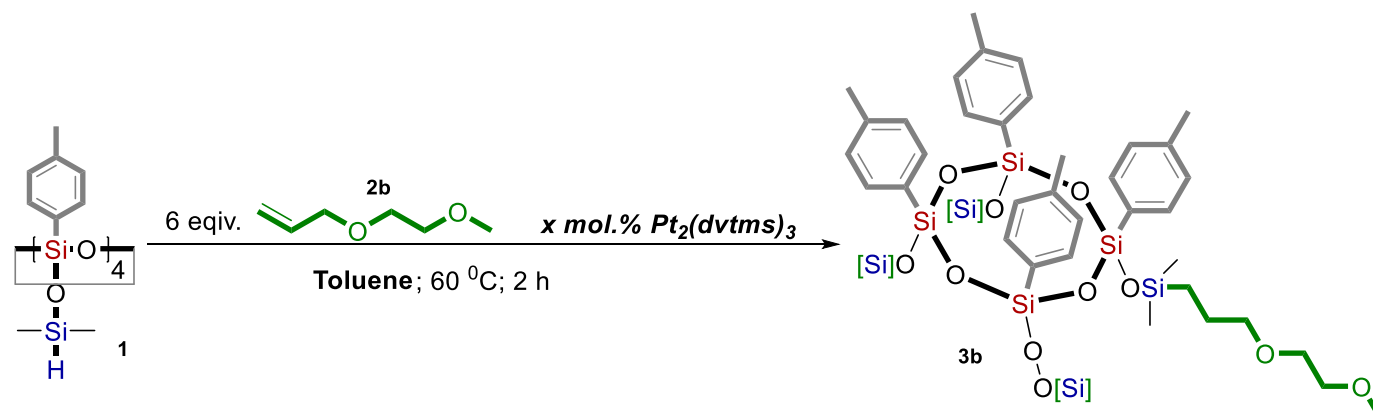

| <b>1, g</b> | <b>x mol %<br/><math>\text{Pt}_2(\text{dvtms})_3</math></b> | <b>Toluene, ml</b> | <b>Conversion of <math>[\text{Si}]-\text{H}</math>, %</b> | <b>Conversion of <math>[\text{Si}]-\text{H}</math> - to<br/><math>[\text{Si}]-\text{CH}_2\text{CH}_2\text{CH}_2\text{OC}_2\text{H}_4\text{OCH}_3</math> -<br/>groups, %</b> |
|-------------|-------------------------------------------------------------|--------------------|-----------------------------------------------------------|-----------------------------------------------------------------------------------------------------------------------------------------------------------------------------|
| 0.025       | 0.45                                                        | 0.25               | 100                                                       | 94                                                                                                                                                                          |
| 0.1         | 0.45                                                        | 1                  | 100                                                       | 94                                                                                                                                                                          |
| 0.5         | 0.225                                                       | 2.5                | 100                                                       | 94                                                                                                                                                                          |
| 1           | 0.1125                                                      | 2.5                | 100                                                       | 94                                                                                                                                                                          |

|   |        |     |     |    |
|---|--------|-----|-----|----|
| 5 | 0.0225 | 2.5 | 100 | 94 |
|---|--------|-----|-----|----|

<sup>a</sup>Reaction conditions: **1** (0.03 mmol, 1 eq.), **2b** (0.18 mmol, 6 eq.), Toluene (0.25—2.5 mL) and Karstedt's catalyst (Pt<sub>2</sub>(dvtms)<sub>3</sub>, 0.0225—0.45 mol %, 3—30 mL) were stirred in Schott culture tubes (H × diam. 100 mm × 10 mm) at 60 °C for 2 h. The conversion of [Si]-H to [Si]-CH<sub>2</sub>CH<sub>2</sub>CH<sub>2</sub>OC<sub>2</sub>H<sub>4</sub>OCH<sub>3</sub> - groups was determined by <sup>1</sup>H NMR spectra.

**S3. Methods of synthesis and characterization data for 1 and  
3a–g**

### 3.1 Synthesis of the compound 1<sup>a</sup>

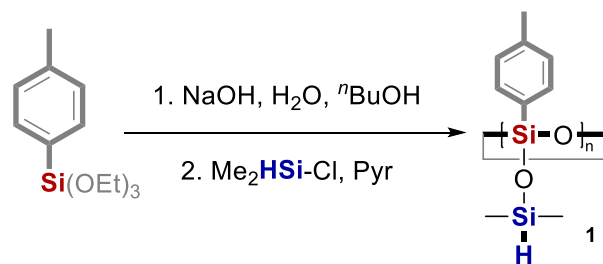

<sup>a</sup>Reaction conditions:<sup>1</sup> Triethoxy-p-tolylsilane (0.039 mol, 1 eq.), NaOH (0.043 mol, 1.1 eq.), H<sub>2</sub>O (0.039 mol, 1 eq.) and <sup>n</sup>BuOH (100 mL) were vigorously stirred under reflux until the solution became completely transparent and then for 1 more hour. Within a few hours, crystals were formed and precipitated from the solution. The crystals were separated by filtration through a Schott filter, washed with <sup>n</sup>BuOH and dried in vacuo (1 mbar / T<sub>room</sub> / 1 h). Resulting crystalline product was added as a solid to a vigorously stirred mixture of dry toluene (1 L), pyridine (0.168 mol, 16 eq.) and dimethylchlorosilane (DMCS) (0.210 mol, 20 eq.) at room temperature. The mixture was stirred at room temperature for 16 h, then precipitate was filtered and organic layer was washed with water until neutral medium. The organic layer was collected, dried over Na<sub>2</sub>SO<sub>4</sub>, and filtered, then the solvent was evaporated and the residue was dried under vacuum (1 mbar / T<sub>room</sub> / 1 h). Product **1** was obtained as a colorless oil in 6.2 g (75 %) yield. <sup>1</sup>H NMR (400 MHz, CDCl<sub>3</sub>): δ = 0.27 (s, 24H); δ = 2.28 (s, 12H); δ = 4.86 (s, 4H); 6.97 (d, 8H); 7.24 (d, 8H); <sup>29</sup>Si NMR (80 MHz, CDCl<sub>3</sub>): δ = -77.44; -3.85; GPC: Mn = 941, Mw = 972, PDI = 1.03.<sup>2</sup>

The oil spontaneously crystalizes at room temperature within a week. The molecular structure of these crystals was analysed using X-Ray analysis.

### 3.2 Synthesis of compounds 3a-g<sup>a</sup>

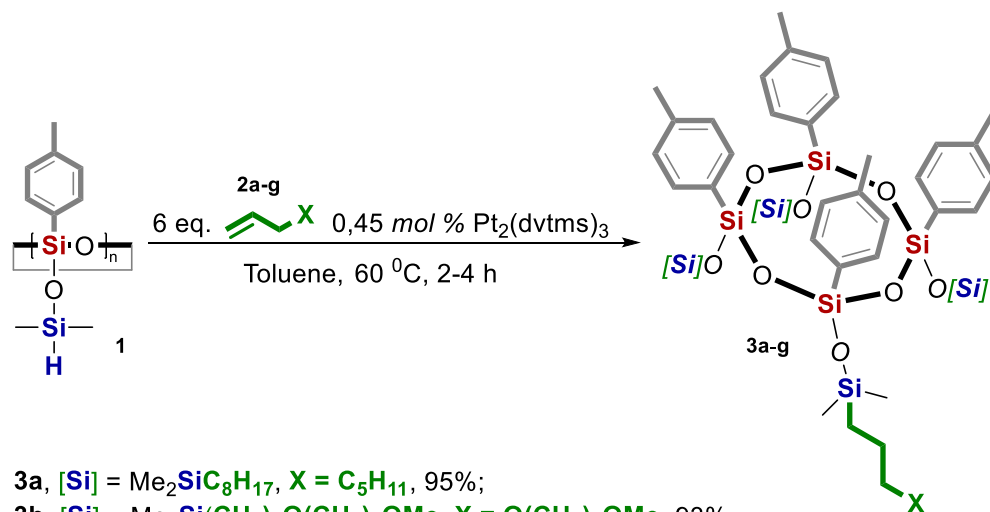

- 3a**, [Si] =  $\text{Me}_2\text{SiC}_8\text{H}_{17}$ , X =  $\text{C}_5\text{H}_{11}$ , 95%;  
**3b**, [Si] =  $\text{Me}_2\text{Si}(\text{CH}_2)_3\text{O}(\text{CH}_2)_2\text{OMe}$ , X =  $\text{O}(\text{CH}_2)_2\text{OMe}$ , 93%;  
**3c**, [Si] =  $\text{Me}_2\text{Si}(\text{CH}_2)_3\text{O}[(\text{CH}_2)_2\text{O}]_2\text{Me}$ , X =  $\text{O}[(\text{CH}_2)_2\text{O}]_2\text{Me}$ , 92%;  
**3d**, [Si] =  $\text{Me}_2\text{Si}(\text{CH}_2)_3\text{O}[(\text{CH}_2)_2\text{O}]_3\text{Me}$ , X =  $\text{O}[(\text{CH}_2)_2\text{O}]_3\text{Me}$ , 92%;  
**3e**, [Si] =  $\text{Me}_2\text{Si}(\text{CH}_2)_3\text{O}[(\text{CH}_2)_2\text{O}]_3\text{H}$ , X =  $\text{O}[(\text{CH}_2)_2\text{O}]_3\text{H}$ , 60%;  
**3f**, [Si] =  $\text{Me}_2\text{Si}(\text{CH}_2)_3\text{NEt}_2$ , X =  $\text{NEt}_2$ , 95%; **3g**, [Si] =  $\text{Me}_2\text{Si}(\text{CH}_2)_3\text{N}(\text{SiMe}_3)_2$ , X =  $\text{N}(\text{SiMe}_3)_2$ , 91%

<sup>a</sup>Reaction conditions: **1** (0.1 g, 0.12 mmol, 1 eq.), **2a—g** (0.081-0.147 g, 0.72 mmol, 6 eq.), Toluene (1 mL) and Karstedt's catalyst ( $\text{Pt}_2(\text{dvtms})_3$ , 0.45 mol %, 12 mL) were stirred in Schott culture tubes (H × diam. 100 mm × 10 mm) at 60 °C for 2—4 h. Then all volatiles were evaporated (40 °C / 1 mbar). Reaction mass was filtered through a short pad (4 cm) of silica gel (V = 10 mL) by eluent: Hexane / EtOAc – 1 / 1). The solvent was evaporated and the residue was dried under vacuum (40 °C / 1 mbar). Products **3a—g** were obtained as colorless oils in 60—95 % yields.

(2,4,6,8-tetrakis(*p*-tolyl)-2,4,6,8-tetraoctyl-1,3,5,7,2,4,6,8-tetroxatetrasiloxane, **3a**)

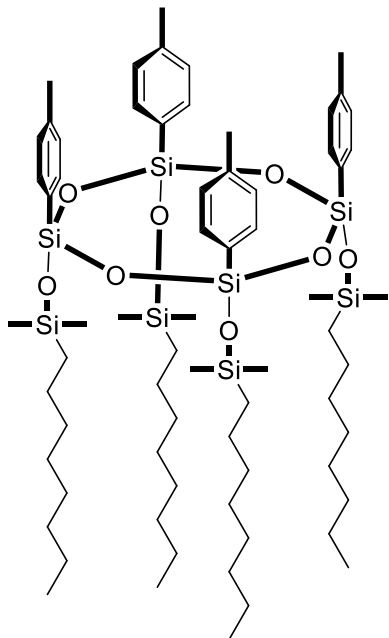

**Method of **3a** synthesis:** **1** (0.1 g, 0.12 mmol, 1 eq.), **2a** (0.08 g, 0.72 mmol, 6 eq.), Toluene (1 mL) and (0.45 mol.% Pt<sub>2</sub>(dvtms)<sub>3</sub>) Karstedt's catalyst (12 mL) were stirred in Schott culture tubes (H × diam. 100 mm × 10 mm) at 60 °C for 2 h. Then all volatiles were evaporated (40 °C / 1 mbar). Reaction mass was filtered through a short pad (4 cm) of silica gel (V = 10 mL) by eluent: Hexane / EtOAc – 1 / 1. The solvent was evaporated and the residue was dried under vacuum (40 °C / 1 mbar). Product **3a** was obtained as colorless oil in 95 % yield (0.147 g).

<sup>1</sup>H NMR (400 MHz, CDCl<sub>3</sub>): δ = 0.18 (s, 24H); δ = 0.62 (m, 8H); δ = 0.91 (t, 12H); δ = 1.26 (m, 48H); δ = 2.30 (s, 12H); 6.92 (d, 8H); 7.22 (d, 8H); <sup>13</sup>C NMR (100 MHz, CDCl<sub>3</sub>): δ = 0.29, 14.11, 18.17, 21.49, 22.69, 23.19, 29.40, 32.00, 33.54, 127.99, 129.98, 134.11, 139.16; <sup>29</sup>Si NMR (80 MHz, CDCl<sub>3</sub>): δ = -79.32; 10.32; IR (cm<sup>-1</sup>): 3060, 2920, 1615, 1470, 1250, 1053; HRMS (ESI) m/z [M + Na]<sup>+</sup> : calcd for [C<sub>68</sub>H<sub>120</sub>O<sub>8</sub>Si<sub>8</sub> + Na]<sup>+</sup>, 1312.7060; found, 1312.7016; [M + K]<sup>+</sup> : calcd for [C<sub>68</sub>H<sub>120</sub>O<sub>8</sub>Si<sub>8</sub> + K]<sup>+</sup>, 1328.6799; found, 1328.6740. GPC: Mn = 1249, Mw = 1295, PDI = 1.04.

(2,4,6,8-tetrakis[3-(2-methoxyethoxy)propyl]-2,4,6,8-tetrakis(*p*-tolyl)-1,3,5,7,2,4,6,8-tetroxatetrasiloxane, **3b**)

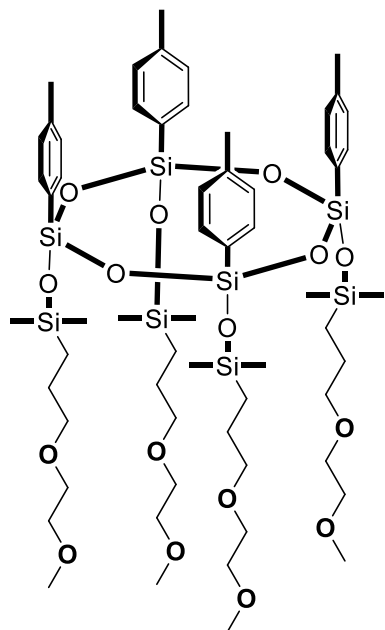

**Method of 3b synthesis:** **1** (0.1 g, 0.12 mmol, 1 eq.), **2b** (0.083 g, 0.72 mmol, 6 eq.), Toluene (1 mL) and (0.45 mol.% Pt<sub>2</sub>(dvtms)<sub>3</sub>) Karstedt's catalyst (12 mL) were stirred in Schott culture tubes (H × diam. 100 mm × 10 mm) at 60 °C for 2 h. Then all volatiles were evaporated (40 °C / 1 mbar). Reaction mass was filtered through a short pad (4 cm) of silica gel (V = 10 mL) by eluent: Hexane / EtOAc – 1 / 1. The solvent was evaporated and the residue was dried under vacuum (40 °C / 1 mbar). Product **3b** was obtained as colorless oil in 93 % yield (purity 97 % according to GPC and <sup>1</sup>H NMR spectra, 0.146 g).

<sup>1</sup>H NMR (400 MHz, CDCl<sub>3</sub>): δ = 0.18 (s, 24H); δ = 0.57 (m, 8H); δ = 1.60 (m, 8H); δ = 2.29 (s, 12H); δ = 3.37 (t, 8H); δ = 3.39 (s, 12H); δ = 3.52 (m, 16H); 6.91 (d, 8H); 7.18 (d, 8H); <sup>13</sup>C NMR (100 MHz, CDCl<sub>3</sub>): δ = 0.18, 13.90, 21.46, 23.19, 58.99, 69.79, 71.96, 74.13, 128.05, 129.58, 134.01, 139.32; <sup>29</sup>Si NMR (80 MHz, CDCl<sub>3</sub>): δ = -79.08; 10.61; IR (cm<sup>-1</sup>): 3015, 2870, 1605, 1455, 1250, 1053; HRMS (ESI) m/z [M + Na]<sup>+</sup> : calcd for [C<sub>60</sub>H<sub>104</sub>O<sub>16</sub>Si<sub>8</sub> + Na]<sup>+</sup>, 1328.5401; found, 1328.5476; [M + K]<sup>+</sup> : calcd for [C<sub>60</sub>H<sub>104</sub>O<sub>16</sub>Si<sub>8</sub> + K]<sup>+</sup>, 1344.5140; found, 1344.5198. GPC: Mn = 1321, Mw = 1373, PDI = 1.04.



(2,4,6,8-tetrakis{3-[2-(2-methoxyethoxy)ethoxy]propyl}-2,4,6,8-tetrakis(*p*-tolyl)-1,3,5,7,2,4,6,8-tetroxatetrasiloxane, **3c**)

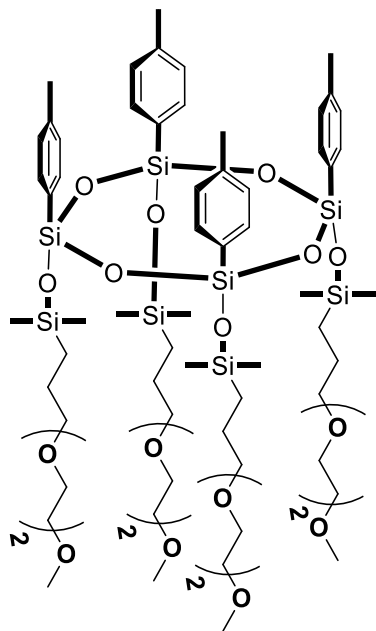

**Method of 3c synthesis:** **1** (0.1 g, 0.12 mmol, 1 eq.), **2c** (0.114 g, 0.72 mmol, 6 eq.), Toluene (1 mL) and (0.45 mol.% Pt<sub>2</sub>(dvtms)<sub>3</sub>) Karstedt's catalyst (12 mL) were stirred in Schott culture tubes (H × diam. 100 mm × 10 mm) at 60 °C for 2 h. Then all volatiles were evaporated (40 °C / 1 mbar). Reaction mass was filtered through a short pad (4 cm) of silica gel (V = 10 mL) by eluent: Hexane / EtOAc – 1 / 1. The solvent was evaporated and the residue was dried under vacuum (40 °C / 1 mbar). Product **3c** was obtained as colorless oil in 92 % yield (purity 95 % according to GPC and <sup>1</sup>H NMR spectra, 0.162 g).

<sup>1</sup>H NMR (400 MHz, CDCl<sub>3</sub>): δ = 0.18 (s, 24H); δ = 0.57 (m, 8H); δ = 1.58 (m, 8H); δ = 2.28 (s, 12H); δ = 3.36 (t, 8H); δ = 3.39 (s, 12H); δ = 3.62 (m, 32H); 6.91 (d, 8H); 7.18 (d, 8H); <sup>13</sup>C NMR (100 MHz, CDCl<sub>3</sub>): δ = 0.19, 13.92, 21.46, 23.21, 58.97, 69.90, 70.50, 71.94, 74.06, 128.06, 129.57, 134.00, 139.33; <sup>29</sup>Si NMR (80 MHz, CDCl<sub>3</sub>): δ = -79.08; 10.59; IR (cm<sup>-1</sup>): 3040, 2870, 1605, 1455, 1250, 1053; HRMS (ESI) m/z [M + Na]<sup>+</sup>: calcd for [C<sub>68</sub>H<sub>120</sub>O<sub>20</sub>Si<sub>8</sub> + Na]<sup>+</sup>, 1504.6450; found, 1504.6503; [M + K]<sup>+</sup>: calcd for [C<sub>68</sub>H<sub>120</sub>O<sub>20</sub>Si<sub>8</sub> + K]<sup>+</sup>, 1520.6189; found, 1520.6242. GPC: Mn = 1465, Mw = 1589, PDI = 1.05.

(2,4,6,8-tetrakis(*p*-tolyl)-2,4,6,8-tetra-4,7,10,13-tetraoxatetradec-1-yl-1,3,5,7,2,4,6,8-tetroxatetrasiloxane, **3d**)

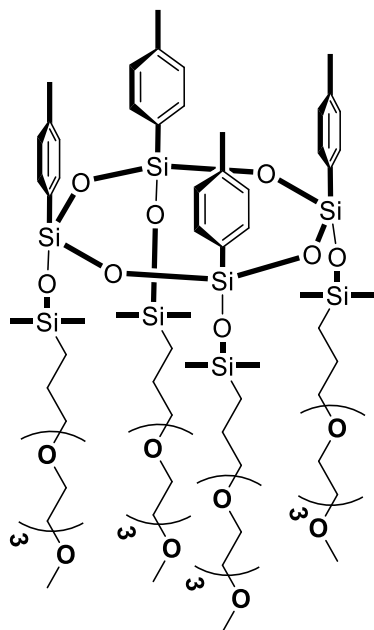

**Method of **3d** synthesis:** **1** (0.1 g, 0.12 mmol, 1 eq.), **2d** (0.146 g, 0.72 mmol, 6 eq.), Toluene (1 mL) and (0.45 mol.% Pt<sub>2</sub>(dvtms)<sub>3</sub>) Karstedt's catalyst (12 mL) were stirred in Schott culture tubes (H × diam. 100 mm × 10 mm) at 60 °C for 2 h. Then all volatiles were evaporated (40 °C / 1 mbar). Reaction mass was filtered through a short pad (4 cm) of silica gel (V = 10 mL) by eluent: Hexane / EtOAc – 1 / 1. The solvent was evaporated and the residue was dried under vacuum (40 °C / 1 mbar). Product **3d** was obtained as colorless oil in 92 % yield (purity 95 % according to GPC and <sup>1</sup>H NMR spectra, 0.181 g).

<sup>1</sup>H NMR (400 MHz, CDCl<sub>3</sub>): δ = 0.18 (s, 24H); δ = 0.57 (m, 8H); δ = 1.58 (m, 8H); δ = 2.28 (s, 12H); δ = 3.35 (t, 8H); δ = 3.39 (s, 12H); δ = 3.66 (m, 48H); 6.90 (d, 8H); 7.17 (d, 8H); <sup>13</sup>C NMR (100 MHz, CDCl<sub>3</sub>): δ = 0.18, 13.90, 21.45, 23.19, 58.96, 69.86, 70.55, 71.91, 74.05, 128.05, 129.55, 133.99, 139.32; <sup>29</sup>Si NMR (80 MHz, CDCl<sub>3</sub>): δ = -79.08; 10.58; IR (cm<sup>-1</sup>): 3040, 2870, 1605, 1455, 1250, 1053; HRMS (ESI) m/z [M + Na]<sup>+</sup>: calcd for [C<sub>76</sub>H<sub>136</sub>O<sub>24</sub>Si<sub>8</sub> + Na]<sup>+</sup>, 1680.7499; found, 1680.7533; [M + K]<sup>+</sup>: calcd for [C<sub>76</sub>H<sub>136</sub>O<sub>24</sub>Si<sub>8</sub> + K]<sup>+</sup>, 1696.7238; found, 1696.7280. GPC: Mn = 1686, Mw = 1760, PDI = 1.05.

(2,4,6,8-tetrakis(*p*-tolyl)-2,4,6,8-tetra-4,7,10,13-tetraoxatetradec-1-yl-1,3,5,7,2,4,6,8-tetroxatetrasiloxane, **3e**)

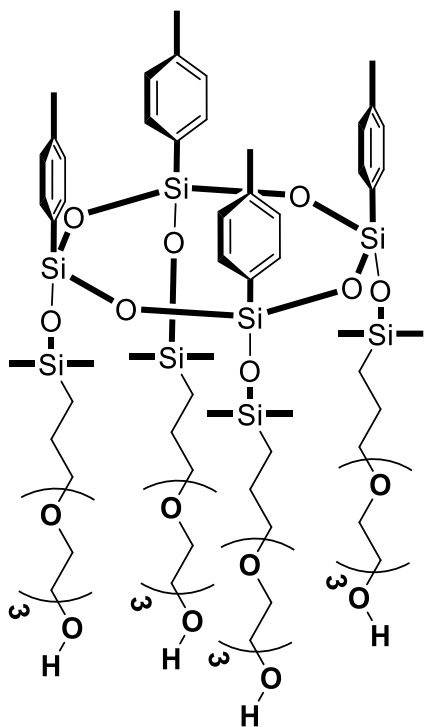

**Method of **3e** synthesis:** **1** (0.1 g, 0.12 mmol, 1 eq.), **2e** (0.137 g, 0.72 mmol, 6 eq.), Toluene (1 mL) and (0.45 mol.% Pt<sub>2</sub>(dvtms)<sub>3</sub>) Karstedt's catalyst (12 mL) were stirred in Schott culture tubes (H × diam. 100 mm × 10 mm) at 60 °C for 2 h. Then all volatiles were evaporated (40 °C / 1 mbar). Reaction mass was filtered through a short pad (4 cm) of silica gel (V = 10 mL) by eluent: Hexane / EtOAc – 1 / 1. The solvent was evaporated and the residue was dried under vacuum (40 °C / 1 mbar). Product **3e** was obtained as colorless oil in 60 % yield (purity 95 % according <sup>1</sup>H NMR spectra, 0.115 g).

<sup>1</sup>H NMR (400 MHz, CDCl<sub>3</sub>): δ = 0.18 (s, 24H); δ = 0.58 (m, 8H); δ = 1.59 (m, 8H); δ = 2.27 (s, 12H); δ = 3.35 (t, 8H); δ = 3.39 (s, 12H); δ = 3.66 (m, 48H); 6.90 (d, 8H); 7.17 (d, 8H); <sup>13</sup>C NMR (100 MHz, CDCl<sub>3</sub>): δ = 0.10, 13.80, 21.36, 23.07, 61.54, 69.75, 70.24, 70.49, 72.41, 73.94, 127.95, 129.44, 133.88, 139.23; <sup>29</sup>Si NMR (80 MHz, CDCl<sub>3</sub>): δ = -79.07; 10.60; IR (cm<sup>-1</sup>): 3450, 3040, 2870, 1605, 1455, 1250, 1053; HRMS (ESI) m/z [M + Na]<sup>+</sup>: calcd for [C<sub>72</sub>H<sub>128</sub>O<sub>24</sub>Si<sub>8</sub> + Na]<sup>+</sup>, 1624.6872; found, 1624.6859; HRMS (ESI) m/z [M + K]<sup>+</sup>: calcd for [C<sub>72</sub>H<sub>128</sub>O<sub>24</sub>Si<sub>8</sub> + K]<sup>+</sup>, 1640.6612; found, 1640.6591

(3,3',3'',3'''-[2,4,6,8-tetrakis(*p*-tolyl)-1,3,5,7,2,4,6,8-tetroxatetrasilocane-2,4,6,8-tetrayl]tetrakis(*N,N*-diethylpropan-1-amine) **3f**)

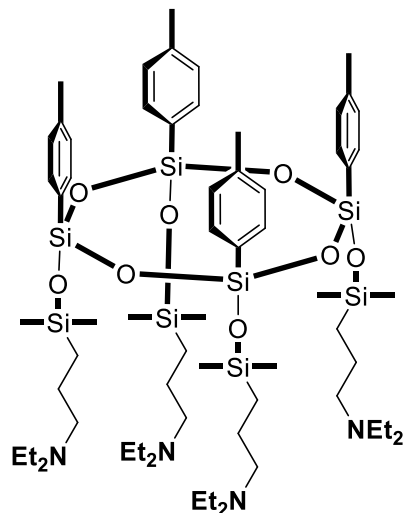

**Method of **3f** synthesis:** **1** (0.1 g, 0.12 mmol, 1 eq.), **2f** (0.081 g, 0.72 mmol, 6 eq.), Toluene (1 mL) and (0.45 mol.% Pt<sub>2</sub>(dvtms)<sub>3</sub>) Karstedt's catalyst (12 mL) were stirred in Schott culture tubes (H × diam. 100 mm × 10 mm) at 60 °C for 2 h. Then all volatiles were evaporated (40 °C / 1 mbar). Reaction mass was filtered through a short pad (4 cm) of silica gel (V = 10 mL) by eluent: Hexane / EtOAc – 1 / 1. The solvent was evaporated and the residue was dried under vacuum (40 °C / 1 mbar). Product **3f** was obtained as colorless oil in 95 % yield (purity 99 % according to GPC and <sup>1</sup>H NMR spectra, 0.148 g).

<sup>1</sup>H NMR (400 MHz, CDCl<sub>3</sub>): δ = 0.20 (s, 24H); δ = 0.54 (m, 8H); δ = 0.99 (t, 24H); δ = 1.41 (m, 8H); δ = 2.28 (s, 12H); δ = 2.35 (t, 8H); δ = 2.47 (q, 8H); 6.91 (d, 8H); 7.19 (d, 8H); <sup>13</sup>C NMR (100 MHz, CDCl<sub>3</sub>): δ = 0.28, 11.72, 15.81, 20.49, 21.47, 46.80, 56.52, 128.04, 129.69, 134.04, 139.28; <sup>29</sup>Si NMR (80 MHz, CDCl<sub>3</sub>): δ = -79.13; 10.46; IR (cm<sup>-1</sup>): 3040, 2870, 1610, 1455, 1250, 1053;

HRMS (ESI) m/z [M + H]<sup>+</sup> : calcd for [C<sub>64</sub>H<sub>116</sub>O<sub>8</sub>N<sub>4</sub>Si<sub>8</sub> + H]<sup>+</sup>, 1294.7050; found, 1294.7087; GPC: Mn = 1006, Mw = 1061, PDI = 1.05.

(*N,N',N'',N'''*-[[2,4,6,8-tetrakis(*p*-tolyl)-1,3,5,7,2,4,6,8-tetroxatetrasiloxane-2,4,6,8-tetrayl]tetrakis(*propane-3,1-diyl*)]tetrakis[1,1,1-trimethyl-*N*-(trimethylsilyl)silanamine], **3g**)

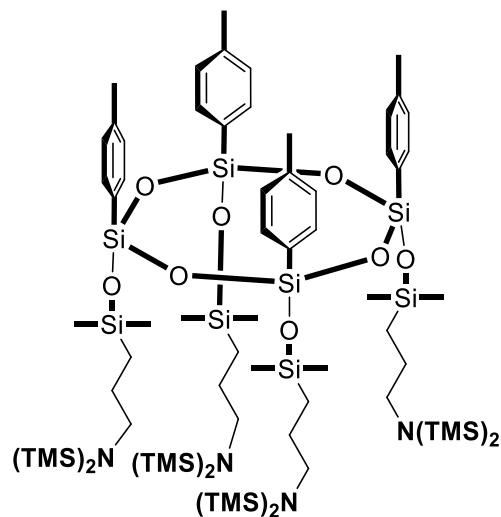

**Method of **3g** synthesis:** **1** (0.1 g, 0.12 mmol, 1 eq.), **2g** (0.144 g, 0.72 mmol, 6 eq.), Toluene (1 mL) and (0.45 mol.%  $\text{Pt}_2(\text{dvtms})_3$ ) Karstedt's catalyst (12 mL) were stirred in Schott culture tubes (H  $\times$  diam. 100 mm  $\times$  10 mm) at 60 °C for 4 h. Then all volatiles were evaporated (40 °C / 1 mbar). Reaction mass was filtered through a short pad (4 cm) of silica gel (V = 10 mL) by eluent: Hexane / EtOAc – 1 / 1. The solvent was evaporated and the residue was dried under vacuum (40 °C / 1 mbar). Product **3g** was obtained as colorless oil in 91 % yield (purity 98 % according to GPC and  $^1\text{H}$  NMR spectra, 0.18 g).

$^1\text{H}$  NMR (400 MHz,  $\text{CDCl}_3$ ):  $\delta$  = 0.07 (s, 72H);  $\delta$  = 0.21 (s, 24H);  $\delta$  = 0.49 (m, 8H);  $\delta$  = 1.31 (m, 8H);  $\delta$  = 2.29 (s, 12H);  $\delta$  = 2.69 (m, 8H); 6.91 (d, 8H); 7.20 (d, 8H);  $^{13}\text{C}$  NMR (100 MHz,  $\text{CDCl}_3$ ):  $\delta$  = 0.26, 2.09, 15.44, 21.49, 28.88, 49.13, 128.07, 129.69, 134.07, 139.25;  $^{29}\text{Si}$  NMR (80 MHz,  $\text{CDCl}_3$ ):  $\delta$  = -79.13; 5.07; 10.10; IR ( $\text{cm}^{-1}$ ): 3040, 2870, 1610, 1455, 1250, 1053; GPC:  $M_n$  = 1820,  $M_w$  = 1890, PDI = 1.04.

**S4.  $^1\text{H}$ ,  $^{13}\text{C}$  and  $^{29}\text{Si}$ , HSQC and HMBC NMR, GPC, IR, ESI**

**MS spectra of 1 and 3a-g**

$^1\text{H}$  NMR  
(400 MHz,  $\text{CDCl}_3$ )

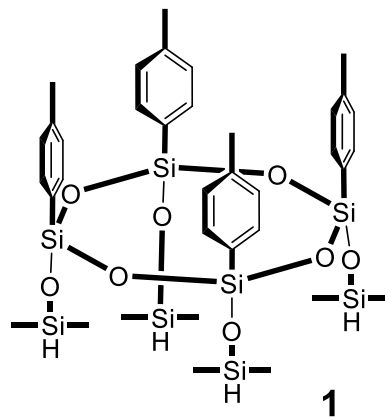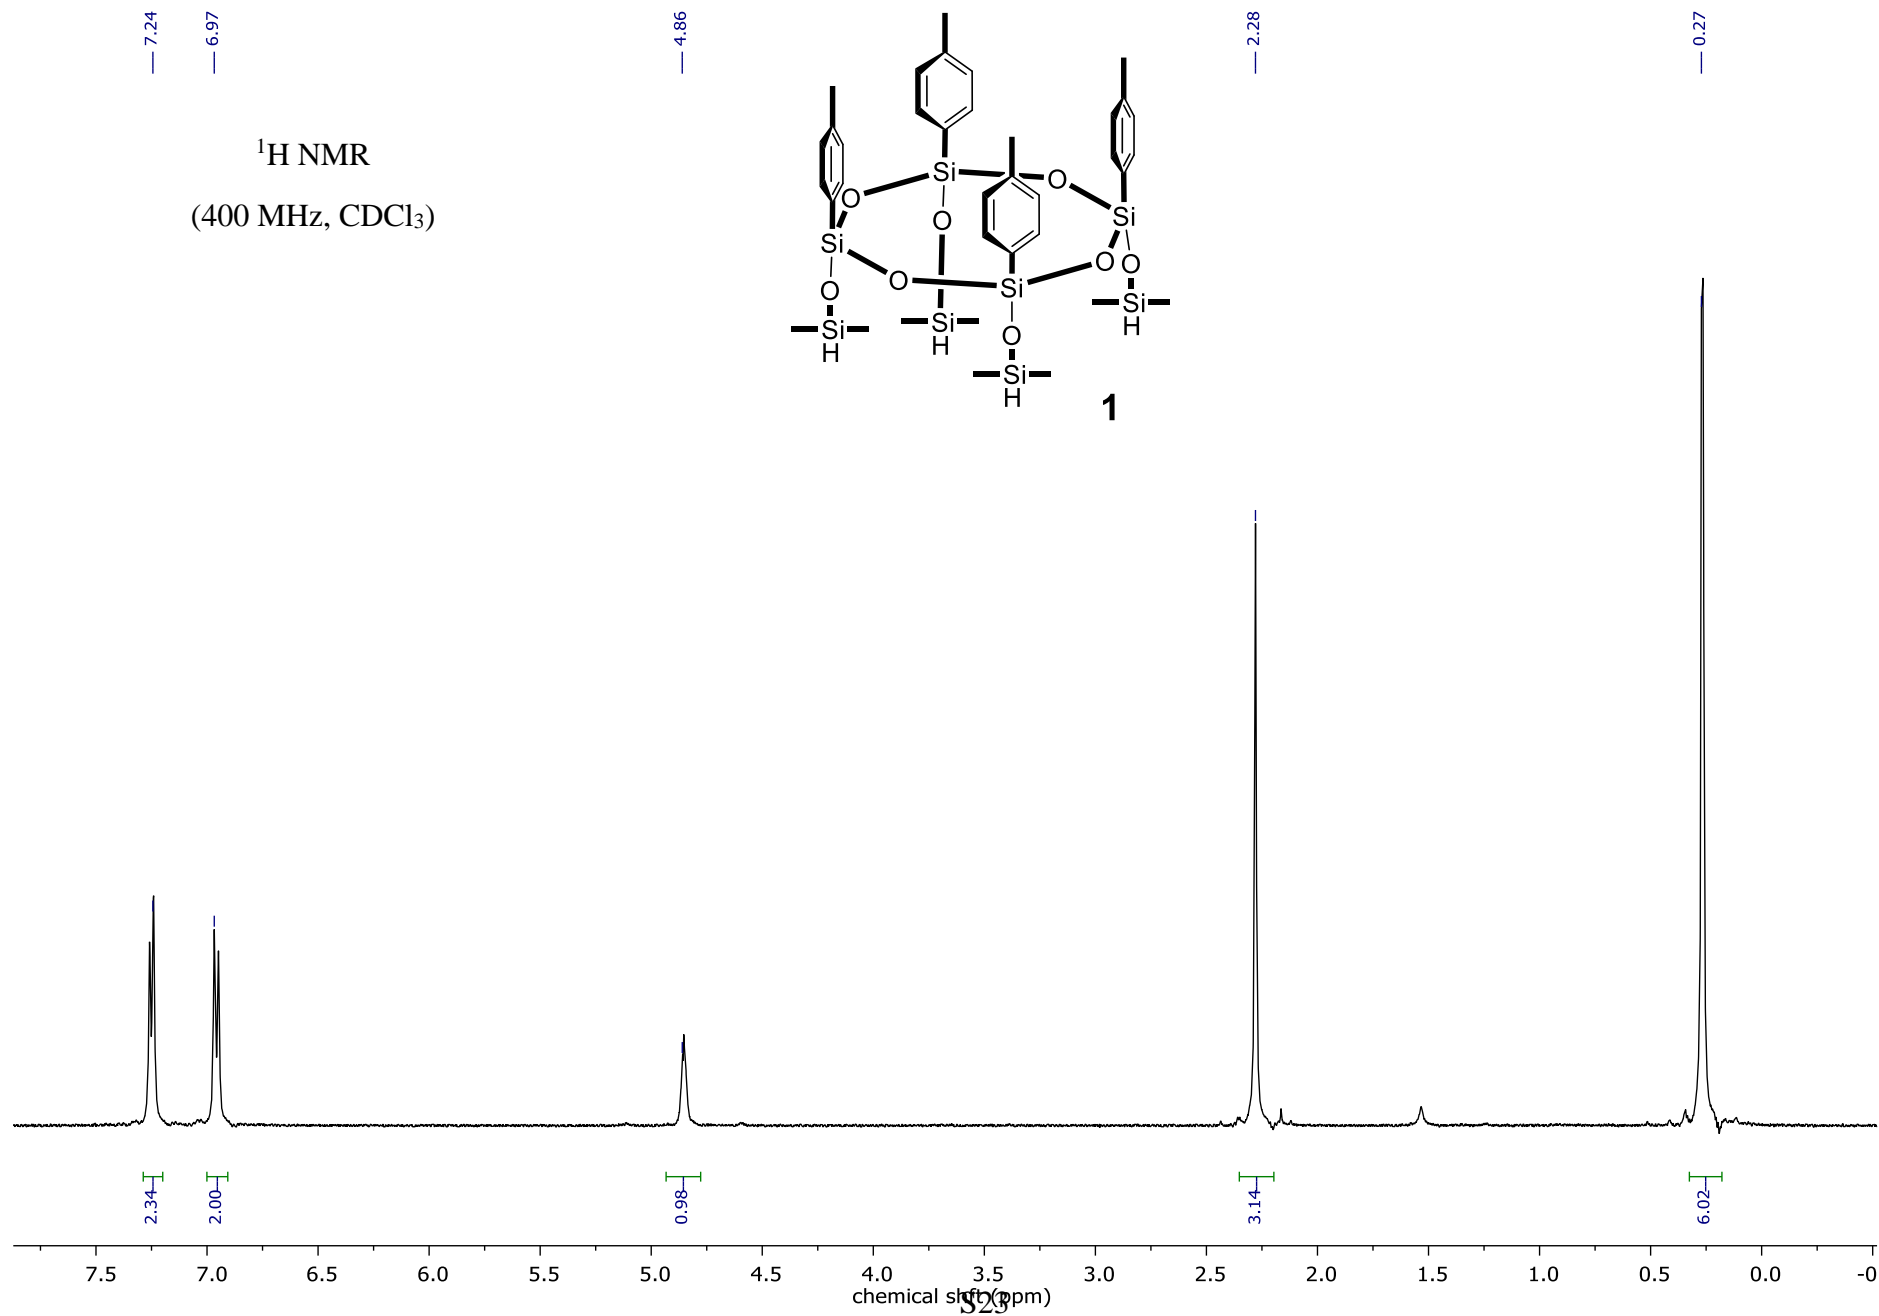

$^{29}\text{Si}$  NMR  
(80 MHz,  $\text{CDCl}_3$ )

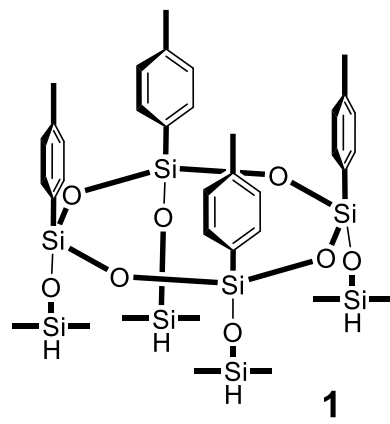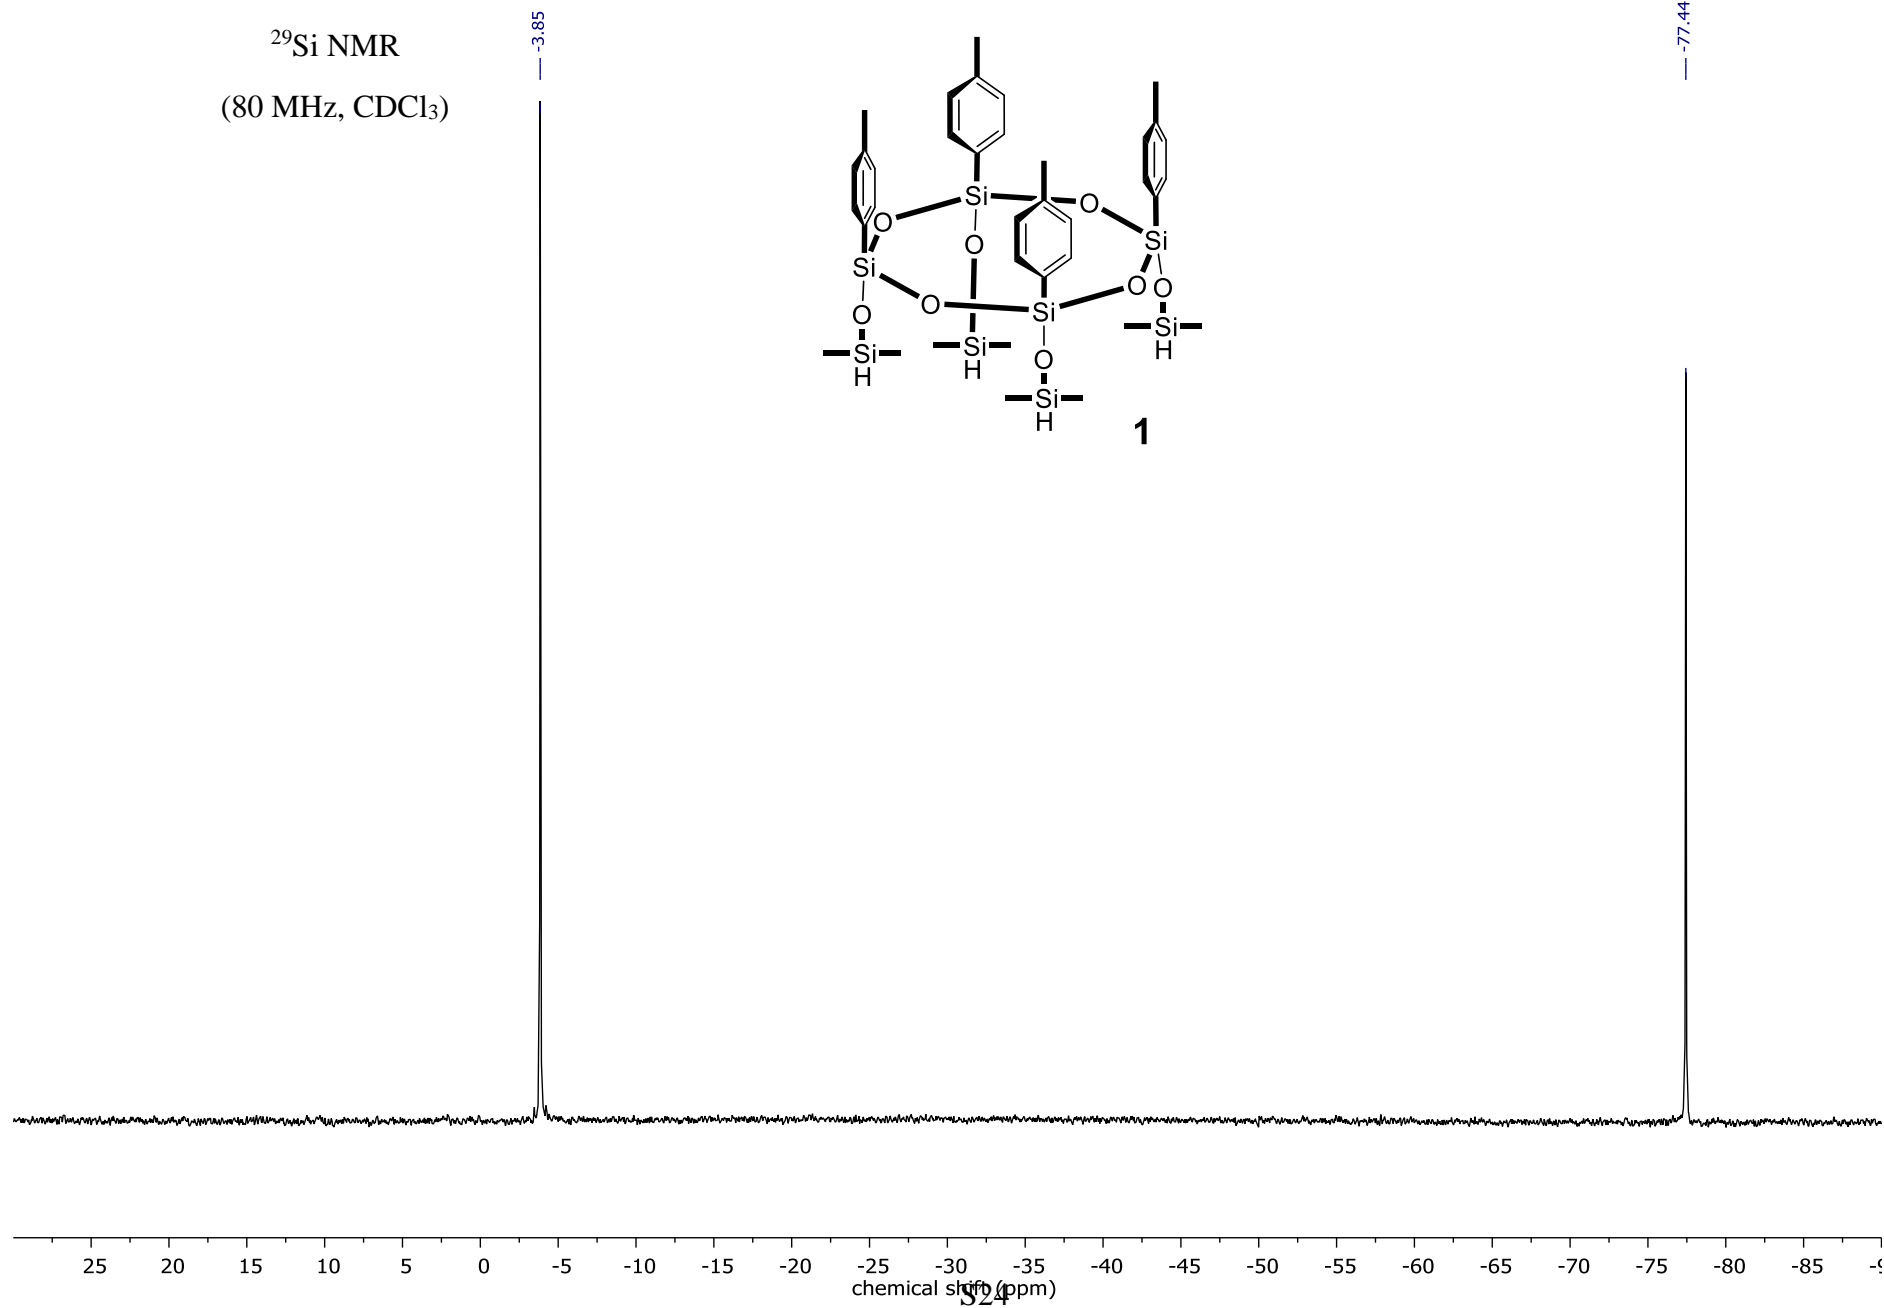



$^1\text{H}, ^{29}\text{Si}$ -HMBC NMR

( $^1\text{H}$ : 400 MHz,  $^{29}\text{Si}$ : 80 MHz,  
 $\text{CDCl}_3$ )

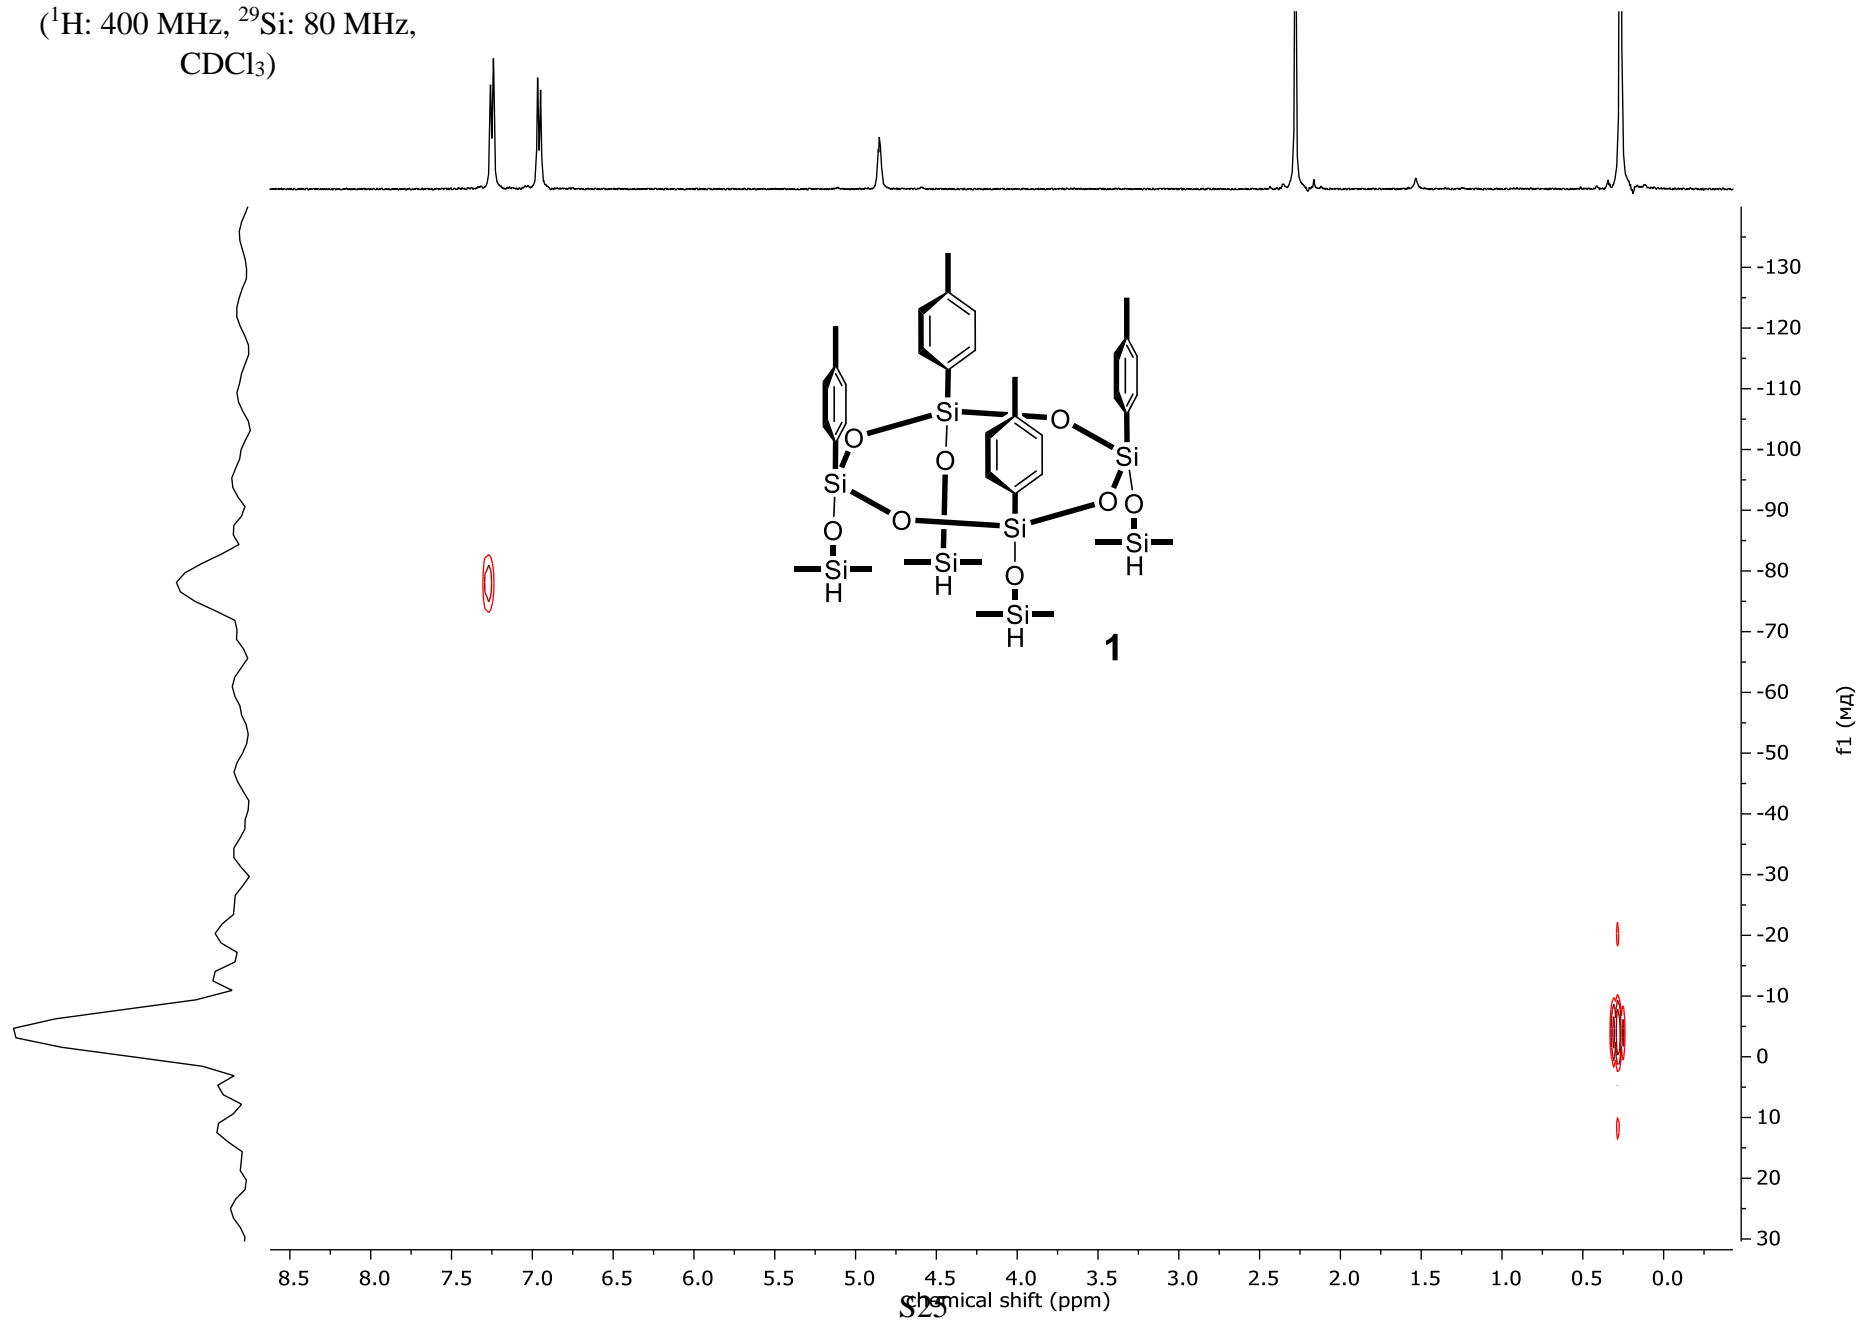

GPC

$M_n = 941$  (pss)

$M_w = 972$  (pss)

PDI = 1.03

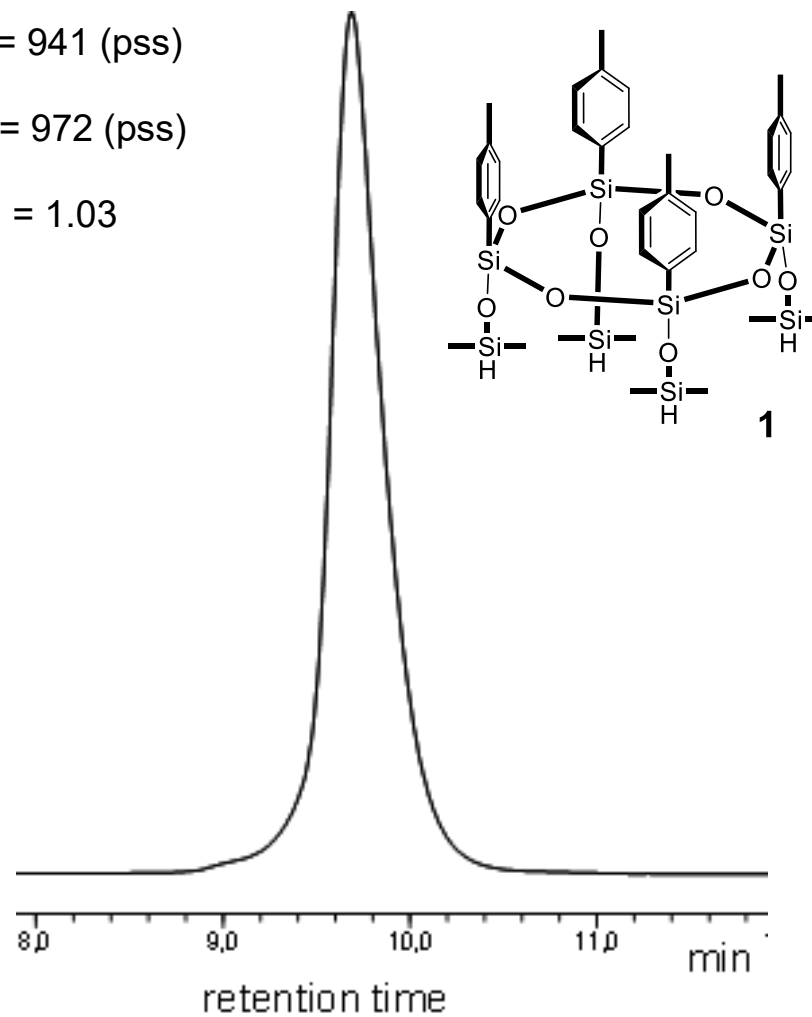

X-ray dataset for compound **1** were measured with Bruker APEX DUO (Mo radiation) diffractometer in Centre for Molecular composition studies of INEOS RAS. Experimental and crystallographic data are summarized in Table S7. Structures were solved

by direct method and refined in anisotropic approximation for non-hydrogen atoms. Hydrogens atoms of methyl and aromatic fragments were calculated according to those idealized geometry and refined with constraints applied to C–H bond lengths and equivalent displacement parameters ( $U_{eq}(H) = 1.2U_{eq}(X)$ , X – central atom of  $XH_2$  group;  $U_{eq}(H) = 1.5U_{eq}(Y)$ , Y – central atom of  $YH_3$  group). All structures were solved with the ShelXT program and refined with the ShelXL program. Molecular graphics was drawn using OLEX2 program.<sup>3-5</sup> CCDC [2069758](https://www.ccdc.cam.ac.uk/structures) contains the supplementary crystallographic data for compound **1**. These data can be obtained free of charge from The Cambridge Crystallographic Data Centre via <https://www.ccdc.cam.ac.uk/structures>.

Compound **1** forms colorless crystals with an orthorhombic unit cell (spacegroup  $P2_12_12_1$ ) with two molecule per asymmetric unit. Some  $SiH(CH_3)_2$  groups are disordered. The molecules form layers, where molecules interact by weak C–H...O contacts. Molecules from different “layers” interact by C–H...H–C and C–H... $\pi$  contacts. So, tolyl fragments do not form any stacking interactions.

**Table S7 Crystal data and structure refinement for yr516.**

|                     |                       |
|---------------------|-----------------------|
| Identification code | 1                     |
| Empirical formula   | $C_{36}H_{56}O_8Si_8$ |
| Formula weight      | 841.52                |
| Temperature/K       | 120                   |
| Crystal system      | orthorhombic          |
| Space group         | $P2_12_12_1$          |
| a/Å                 | 10.2751(14)           |
| b/Å                 | 22.028(2)             |
| c/Å                 | 41.384(7)             |

|                                               |                                                                |
|-----------------------------------------------|----------------------------------------------------------------|
| $\alpha/^\circ$                               | 90                                                             |
| $\beta/^\circ$                                | 90                                                             |
| $\gamma/^\circ$                               | 90                                                             |
| Volume/ $\text{\AA}^3$                        | 9367(2)                                                        |
| Z                                             | 8                                                              |
| $\rho_{\text{calc}}/\text{g/cm}^3$            | 1.194                                                          |
| $\mu/\text{mm}^{-1}$                          | 0.272                                                          |
| Crystal size/ $\text{mm}^3$                   | $0.21 \times 0.18 \times 0.17$                                 |
| Radiation                                     | MoK $\alpha$ ( $\lambda = 0.71073$ )                           |
| $2\Theta$ range for data collection/ $^\circ$ | 1.968 to 61.344                                                |
| Index ranges                                  | $-14 \leq h \leq 14, -31 \leq k \leq 31, -59 \leq l \leq 59$   |
| Reflections collected                         | 109594                                                         |
| Independent reflections                       | 28693 [ $R_{\text{int}} = 0.1182, R_{\text{sigma}} = 0.1250$ ] |
| Data/restraints/parameters                    | 28693/13/991                                                   |
| Goodness-of-fit on $F^2$                      | 1.052                                                          |
| Final R indexes [ $I \geq 2\sigma(I)$ ]       | $R_1 = 0.0831, wR_2 = 0.1735$                                  |
| Final R indexes [all data]                    | $R_1 = 0.1305, wR_2 = 0.1938$                                  |
| Largest diff. peak/hole / $e \text{\AA}^{-3}$ | 0.72/-0.58                                                     |
| Flack parameter                               | 0.03(5)                                                        |

$^1\text{H}$  NMR  
(400 MHz,  $\text{CDCl}_3$ )

7.28  
7.23  
7.20  
6.93  
6.90

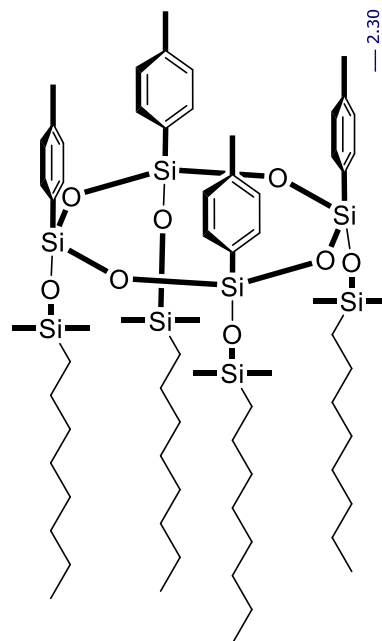

**3a**

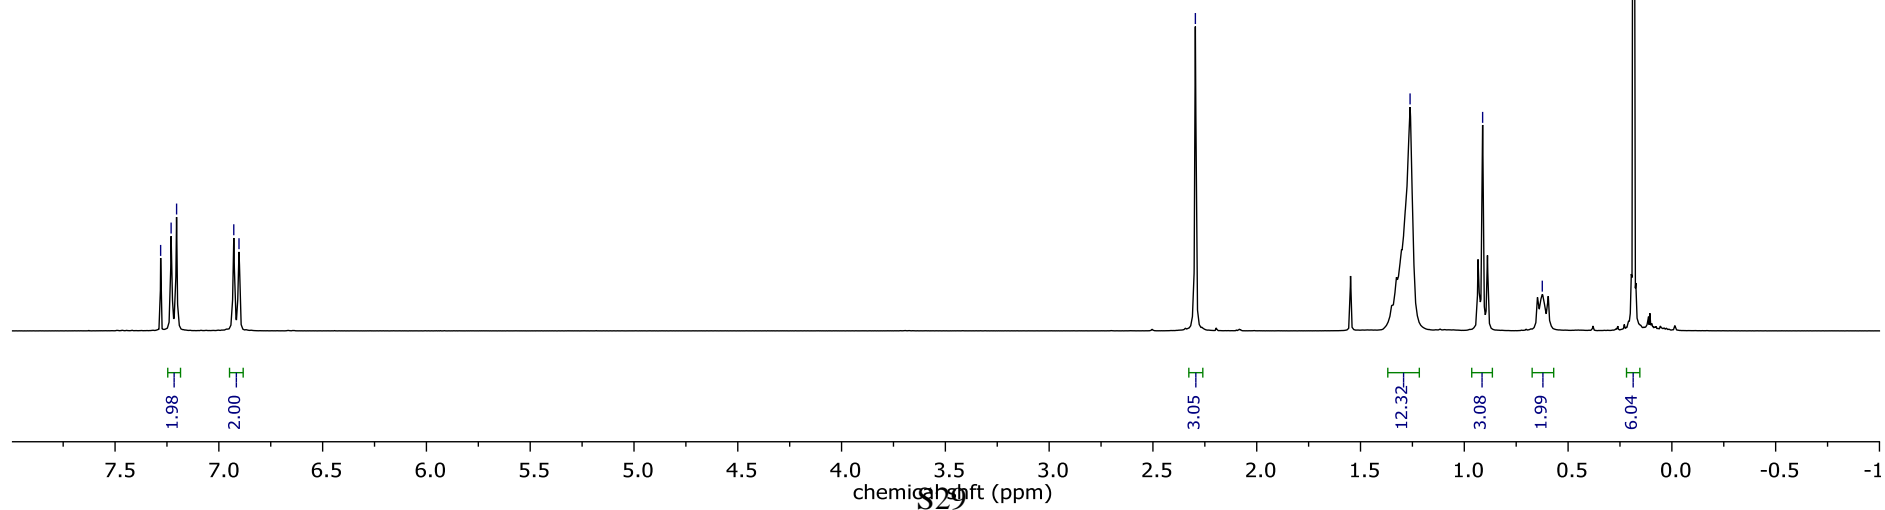

<sup>13</sup>C NMR  
(100 MHz, CDCl<sub>3</sub>)

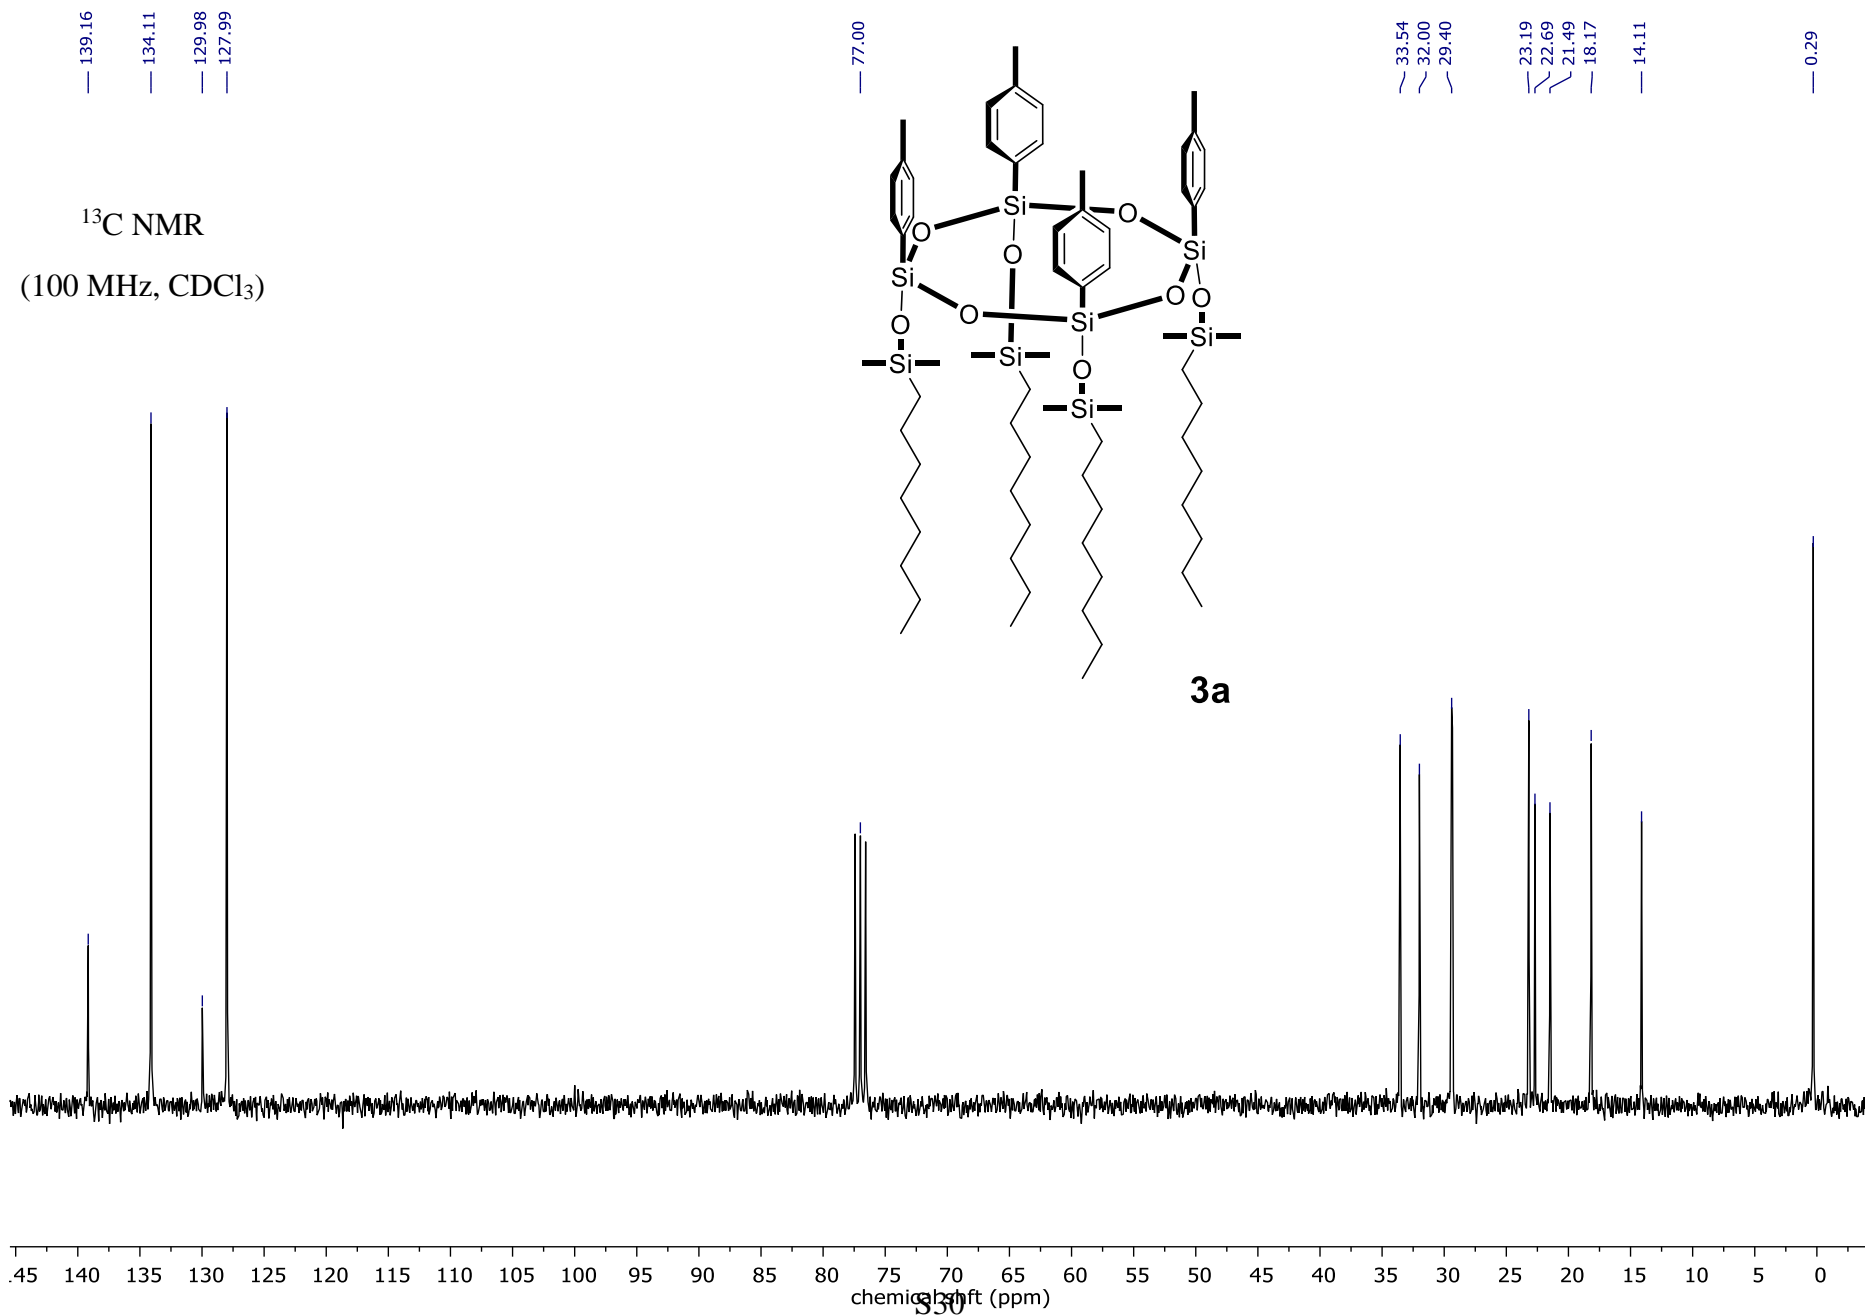

$^{29}\text{Si}$  NMR  
(80 MHz,  $\text{CDCl}_3$ )

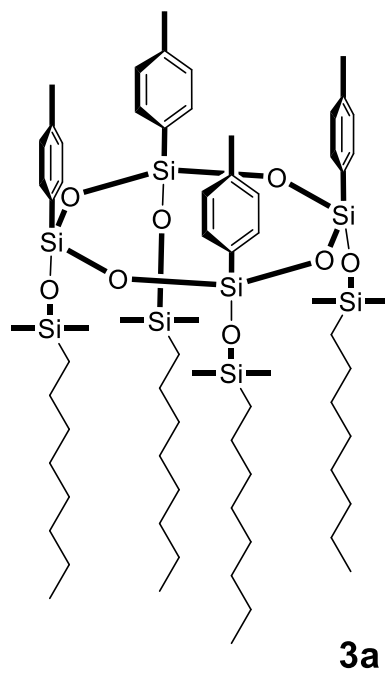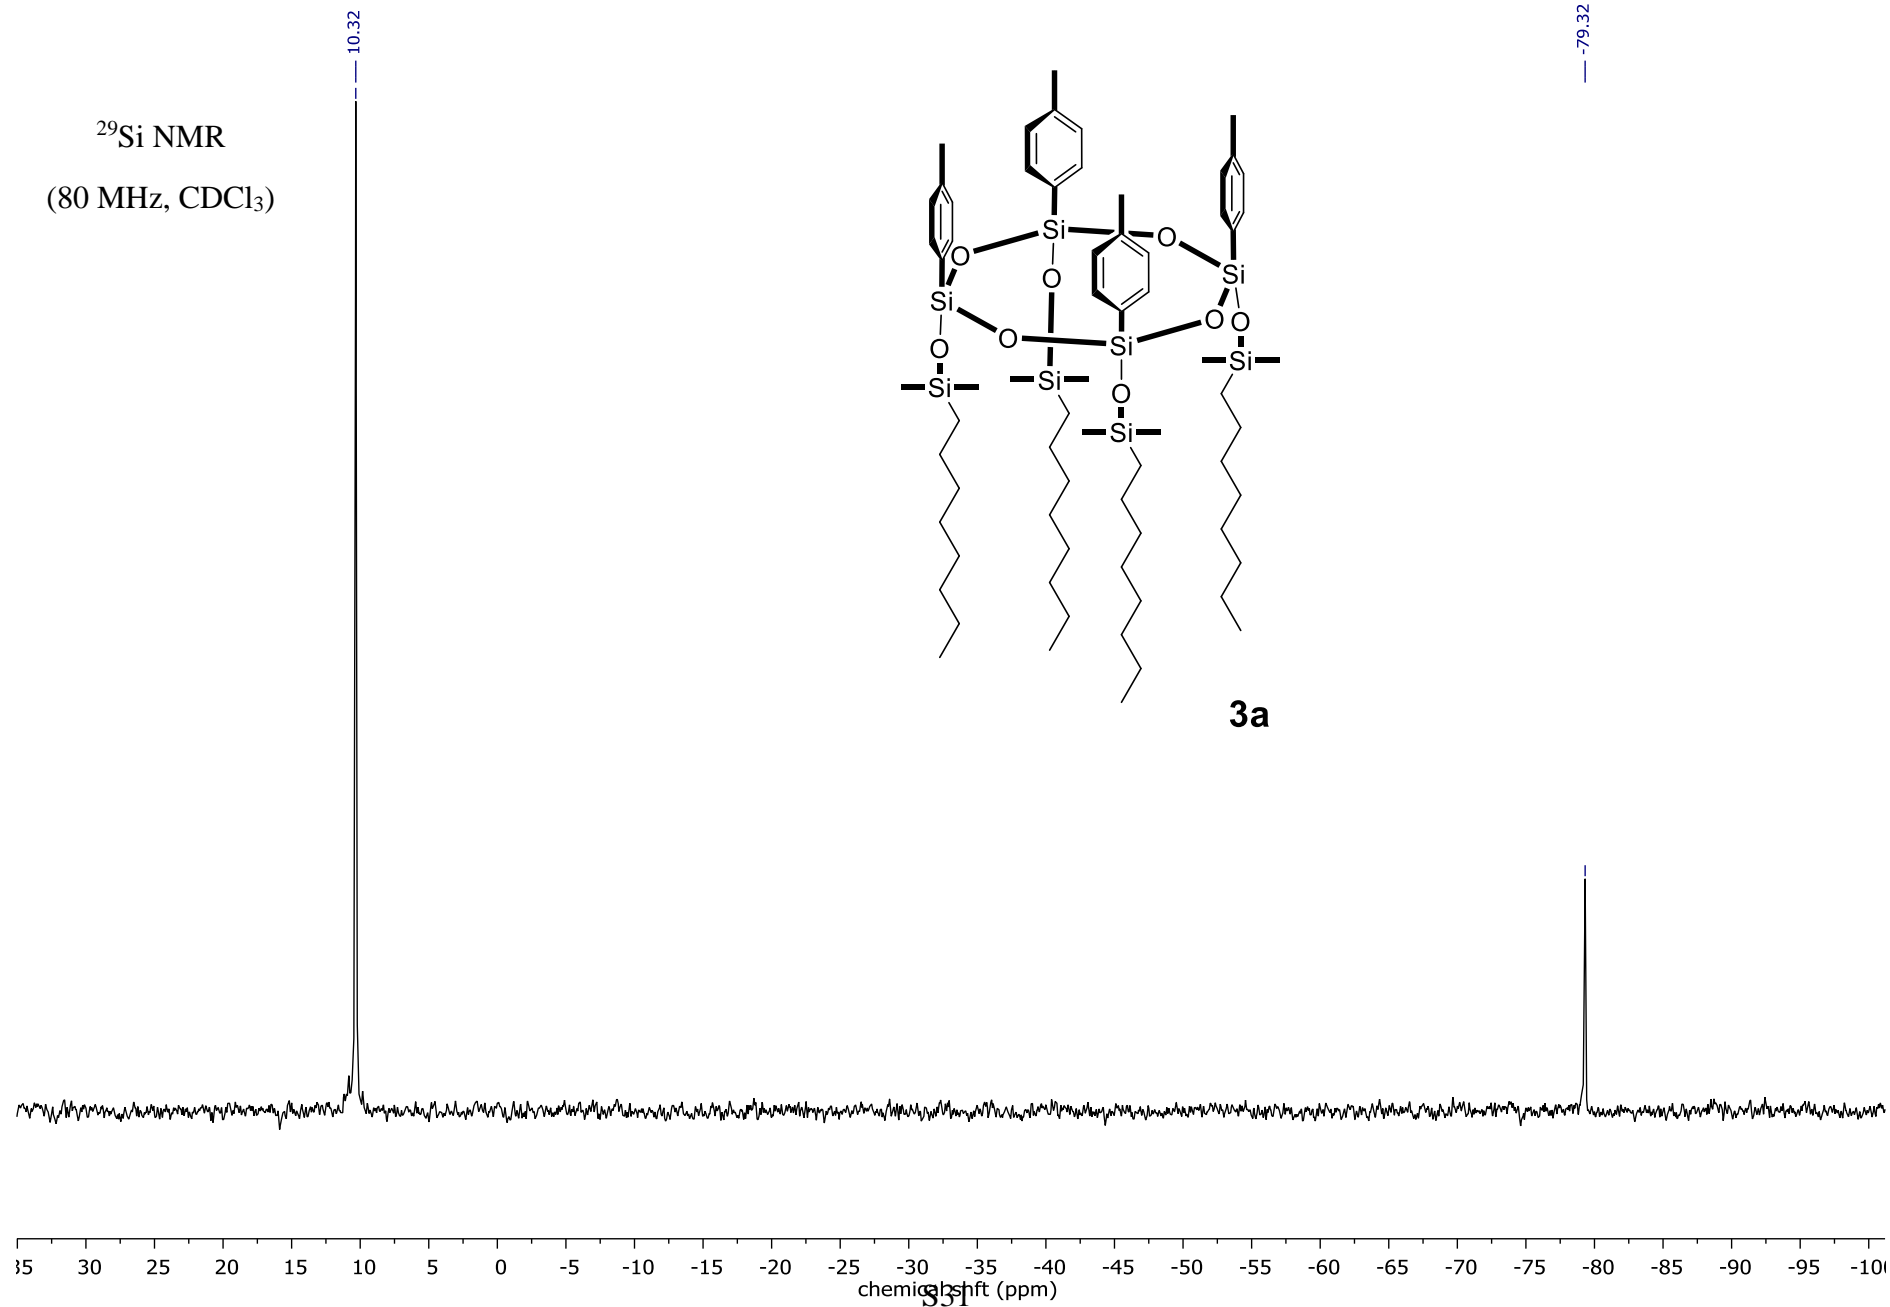

$^1\text{H}, ^{13}\text{C}$  edited-HSQC NMR,  
( $^1\text{H}$ : 400 MHz,  $^{13}\text{C}$ : 100 MHz,  
 $\text{CDCl}_3$ )

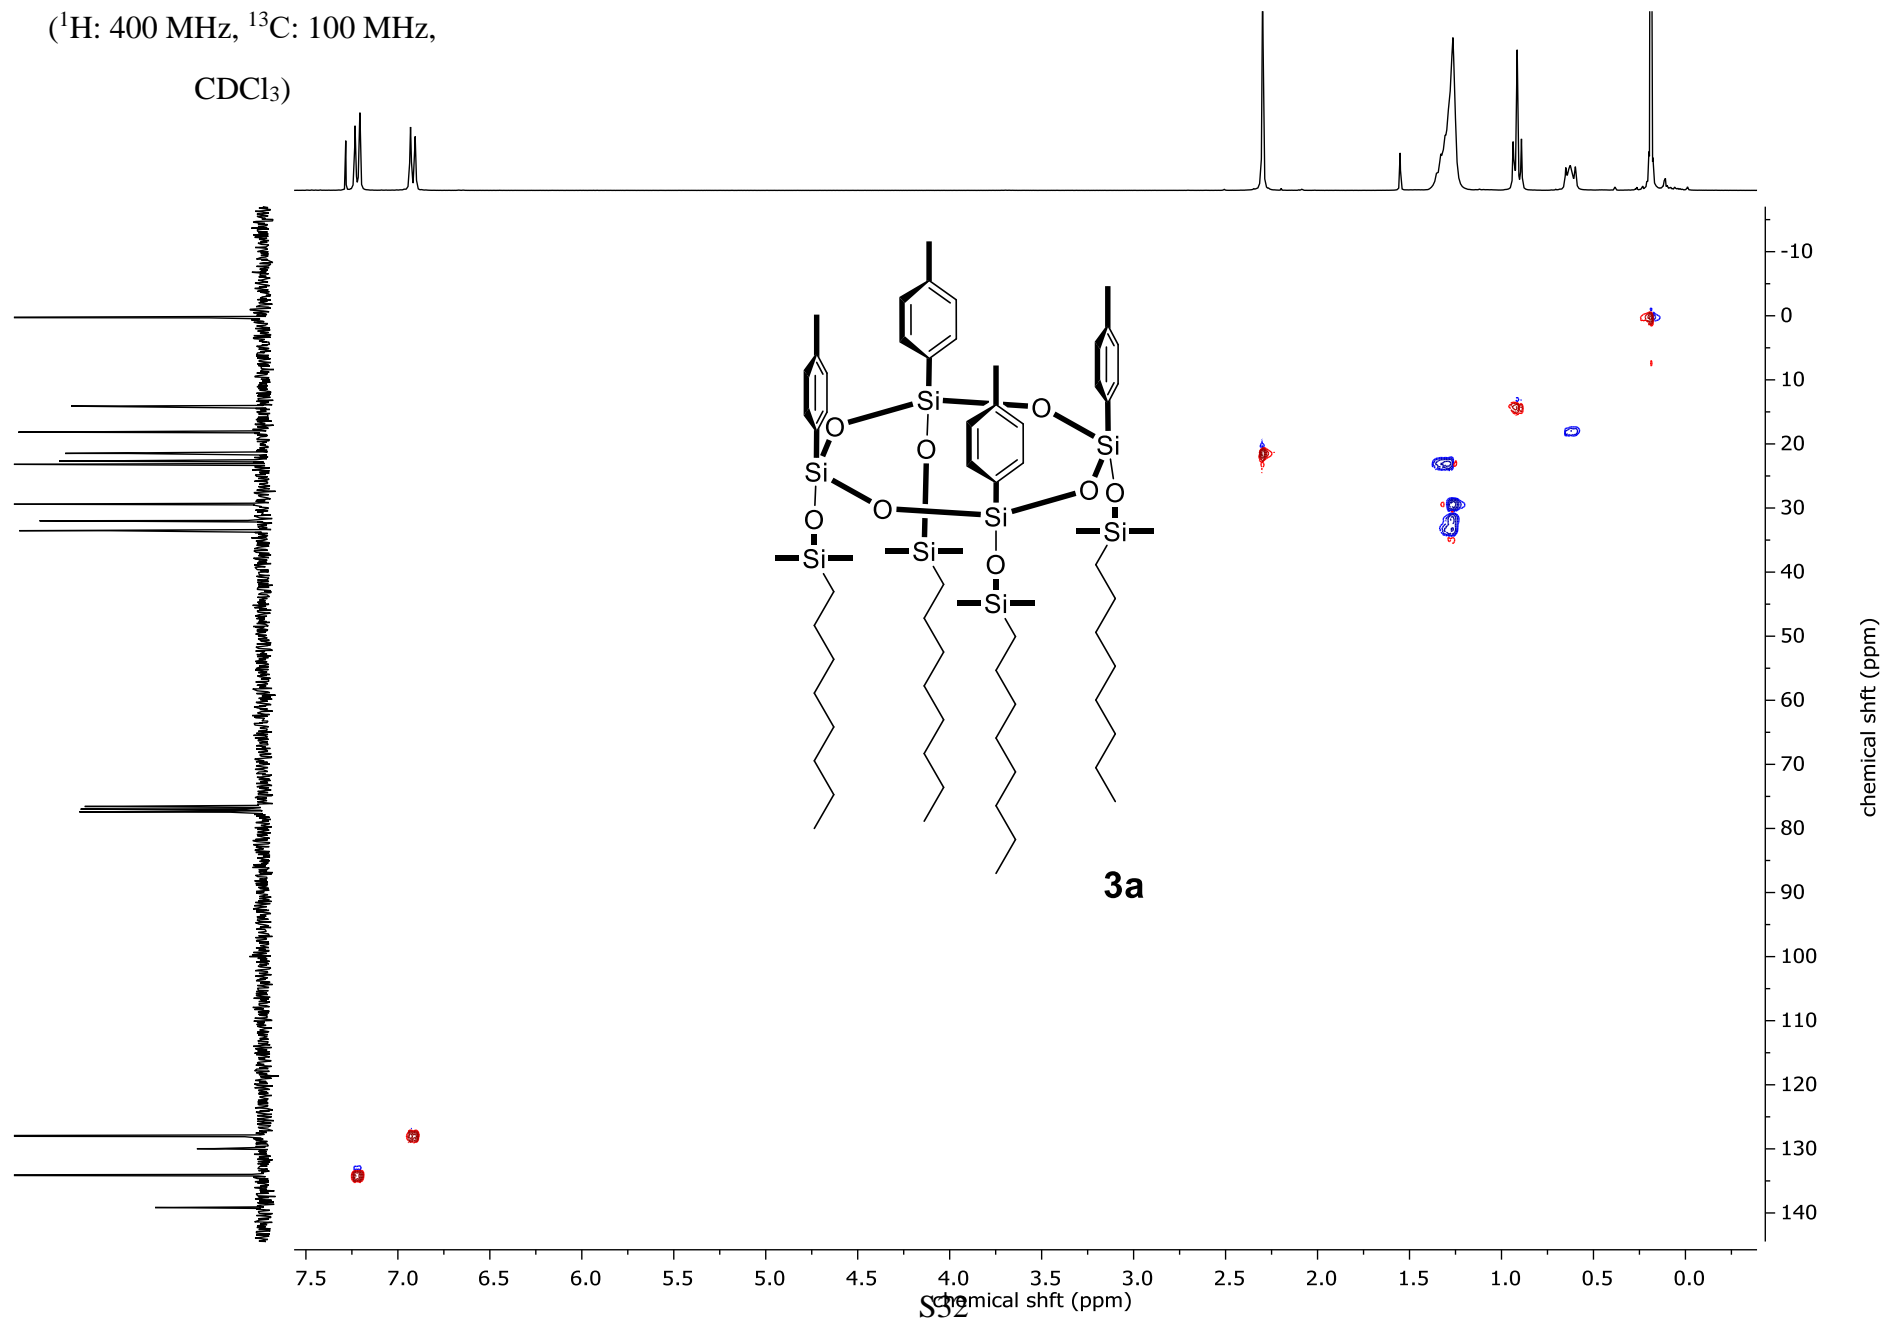



$^1\text{H}, ^{13}\text{C}$ -HMBC NMR,

( $^1\text{H}$ : 400 MHz,  $^{13}\text{C}$ : 100 MHz,

$\text{CDCl}_3$ )

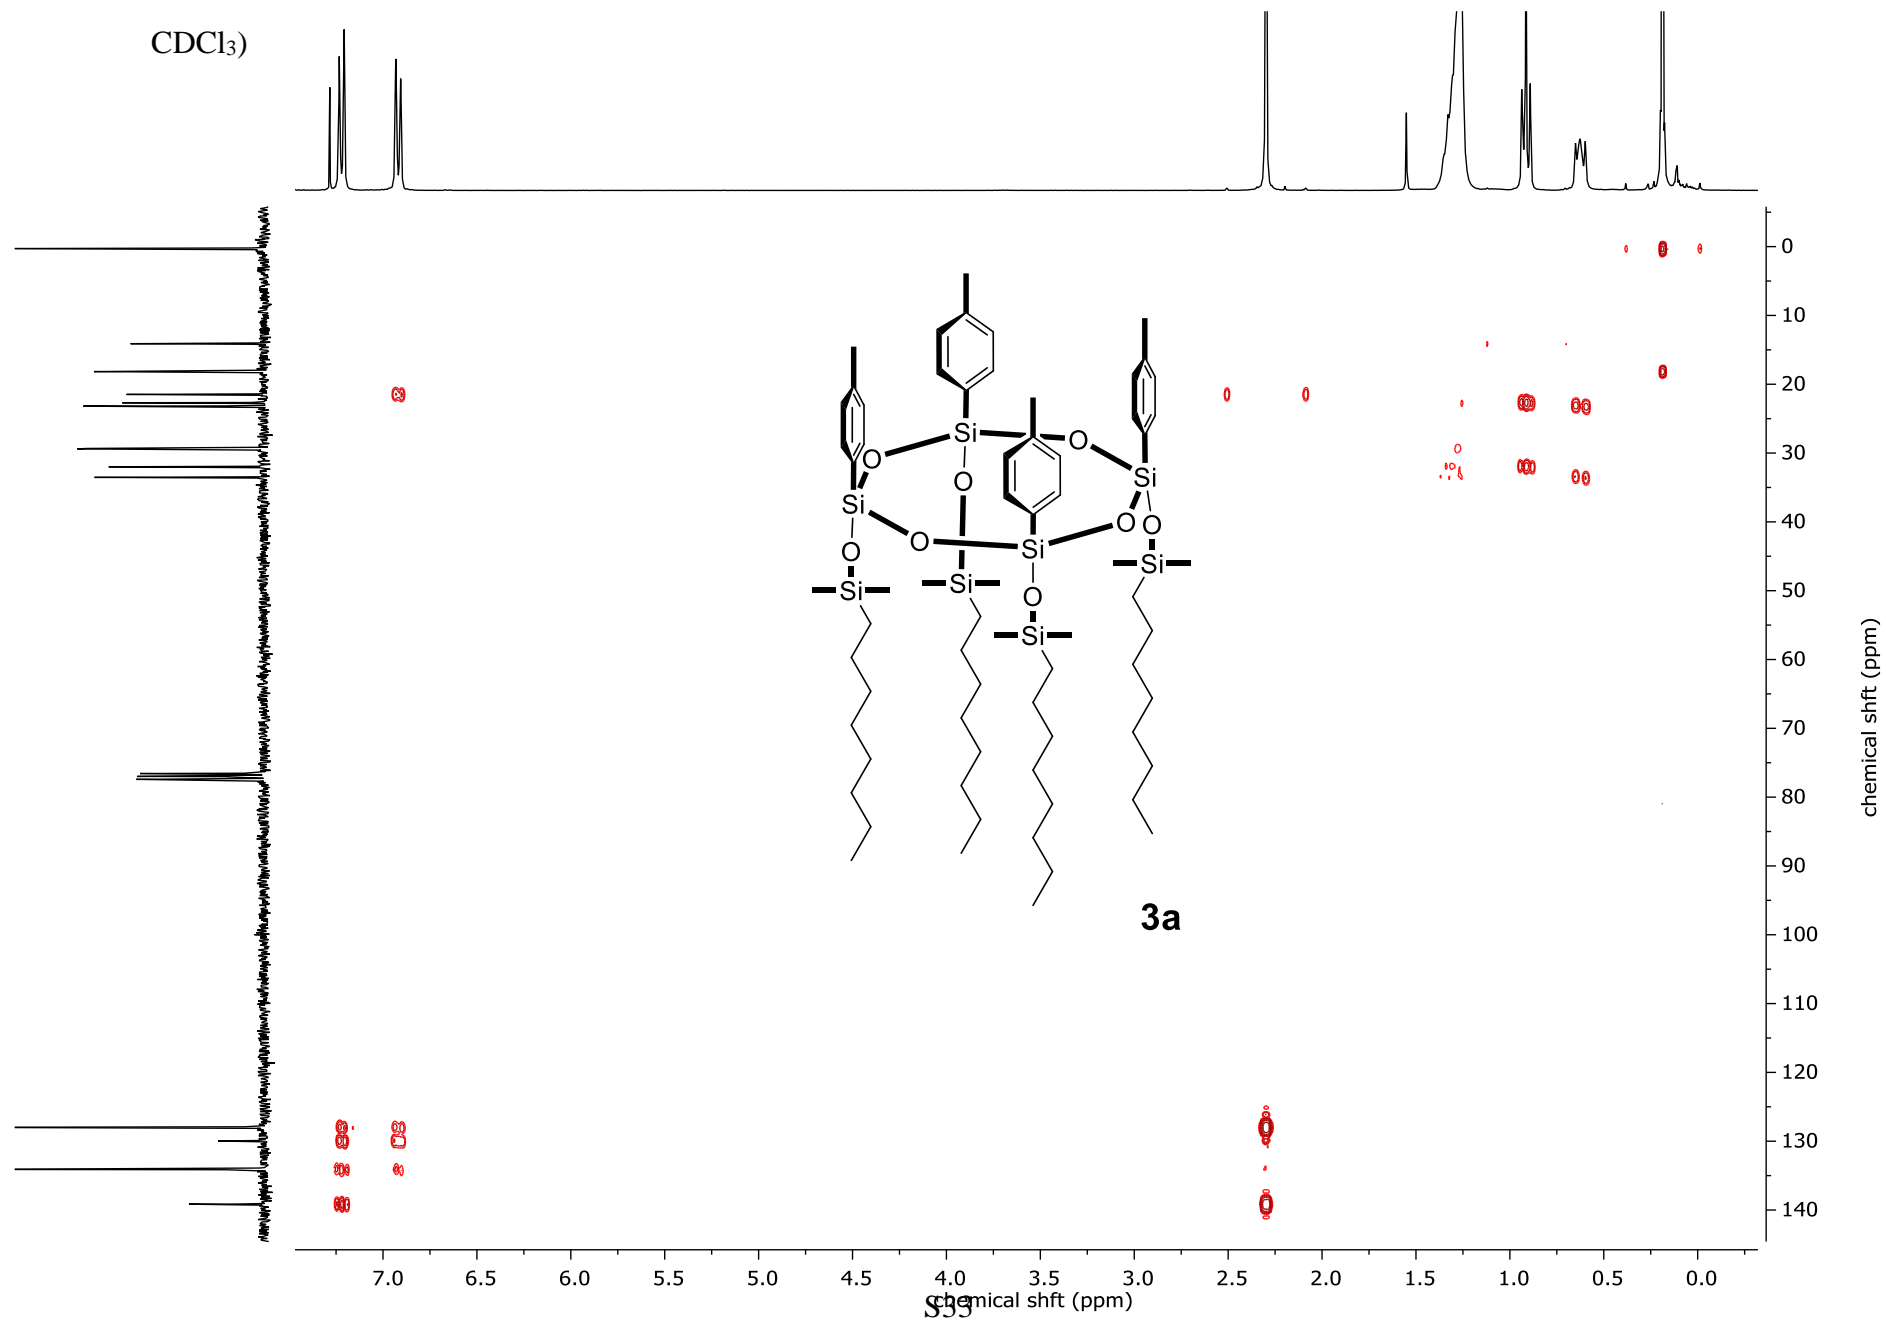

$^1\text{H}, ^{29}\text{Si}$ -HMBC NMR,

( $^1\text{H}$ : 400 MHz,  $^{29}\text{Si}$ : 80 MHz,

$\text{CDCl}_3$ )

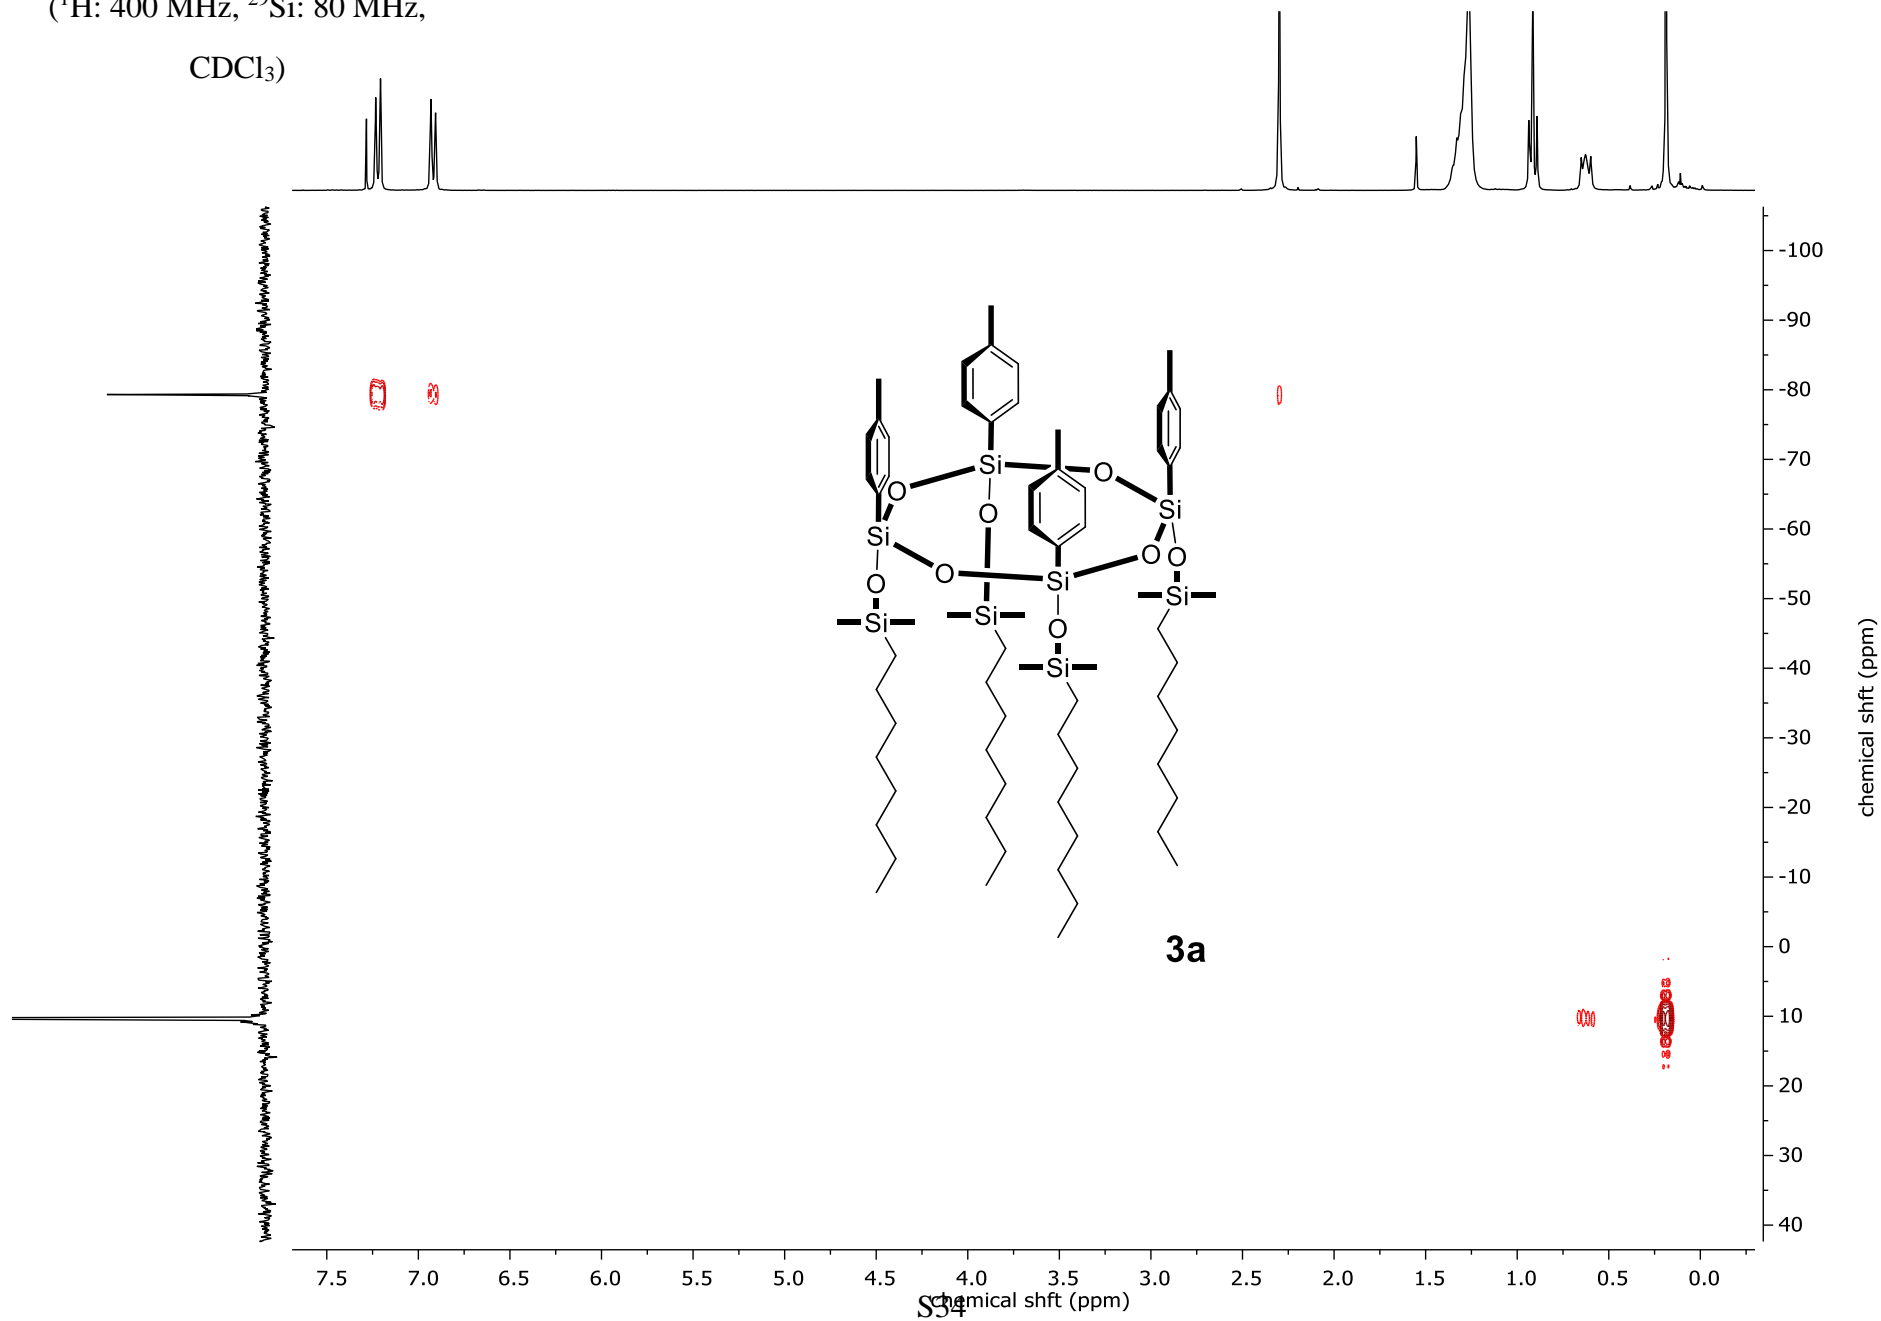

GPC

$M_n = 1249$  (pss)

$M_w = 1295$  (pss)

PDI = 1.04

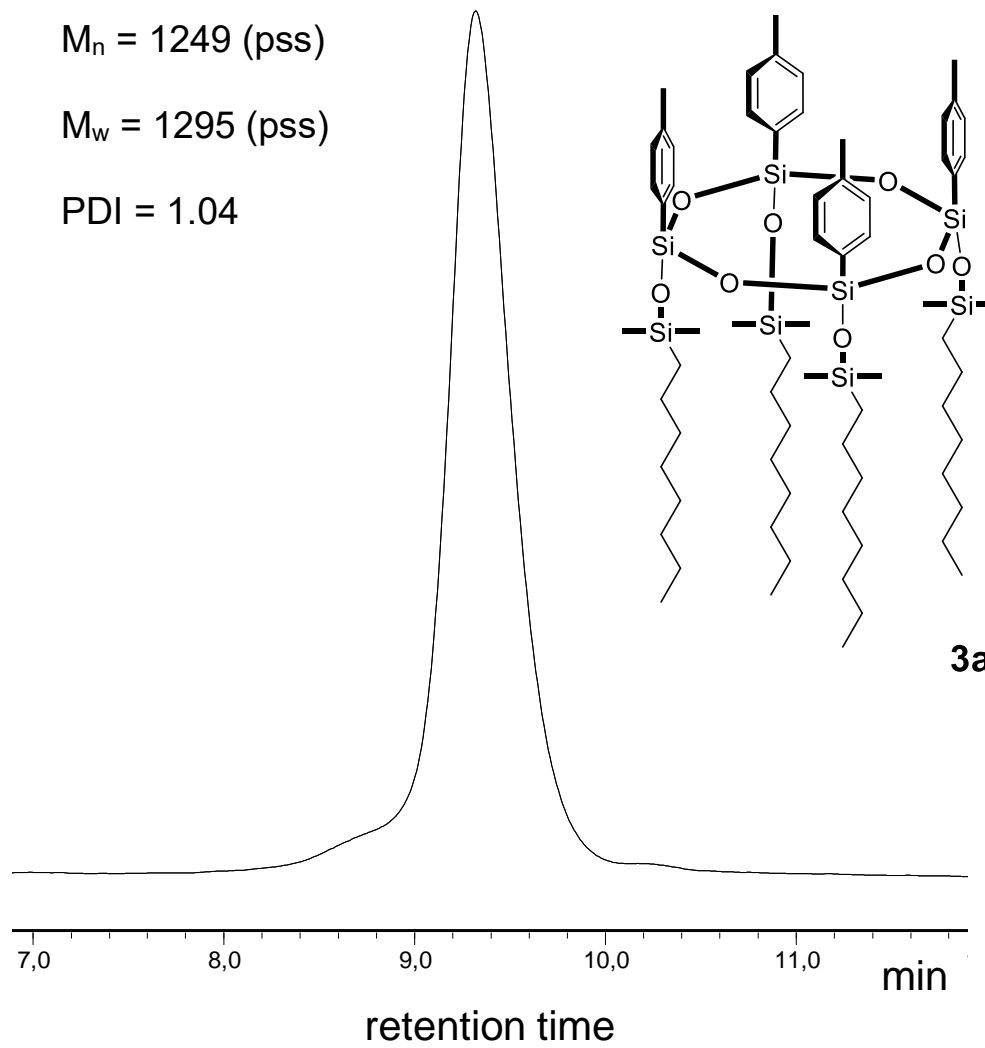

IR-spectrum

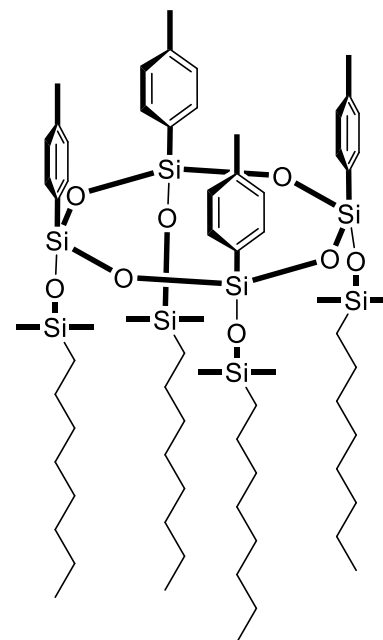

3a

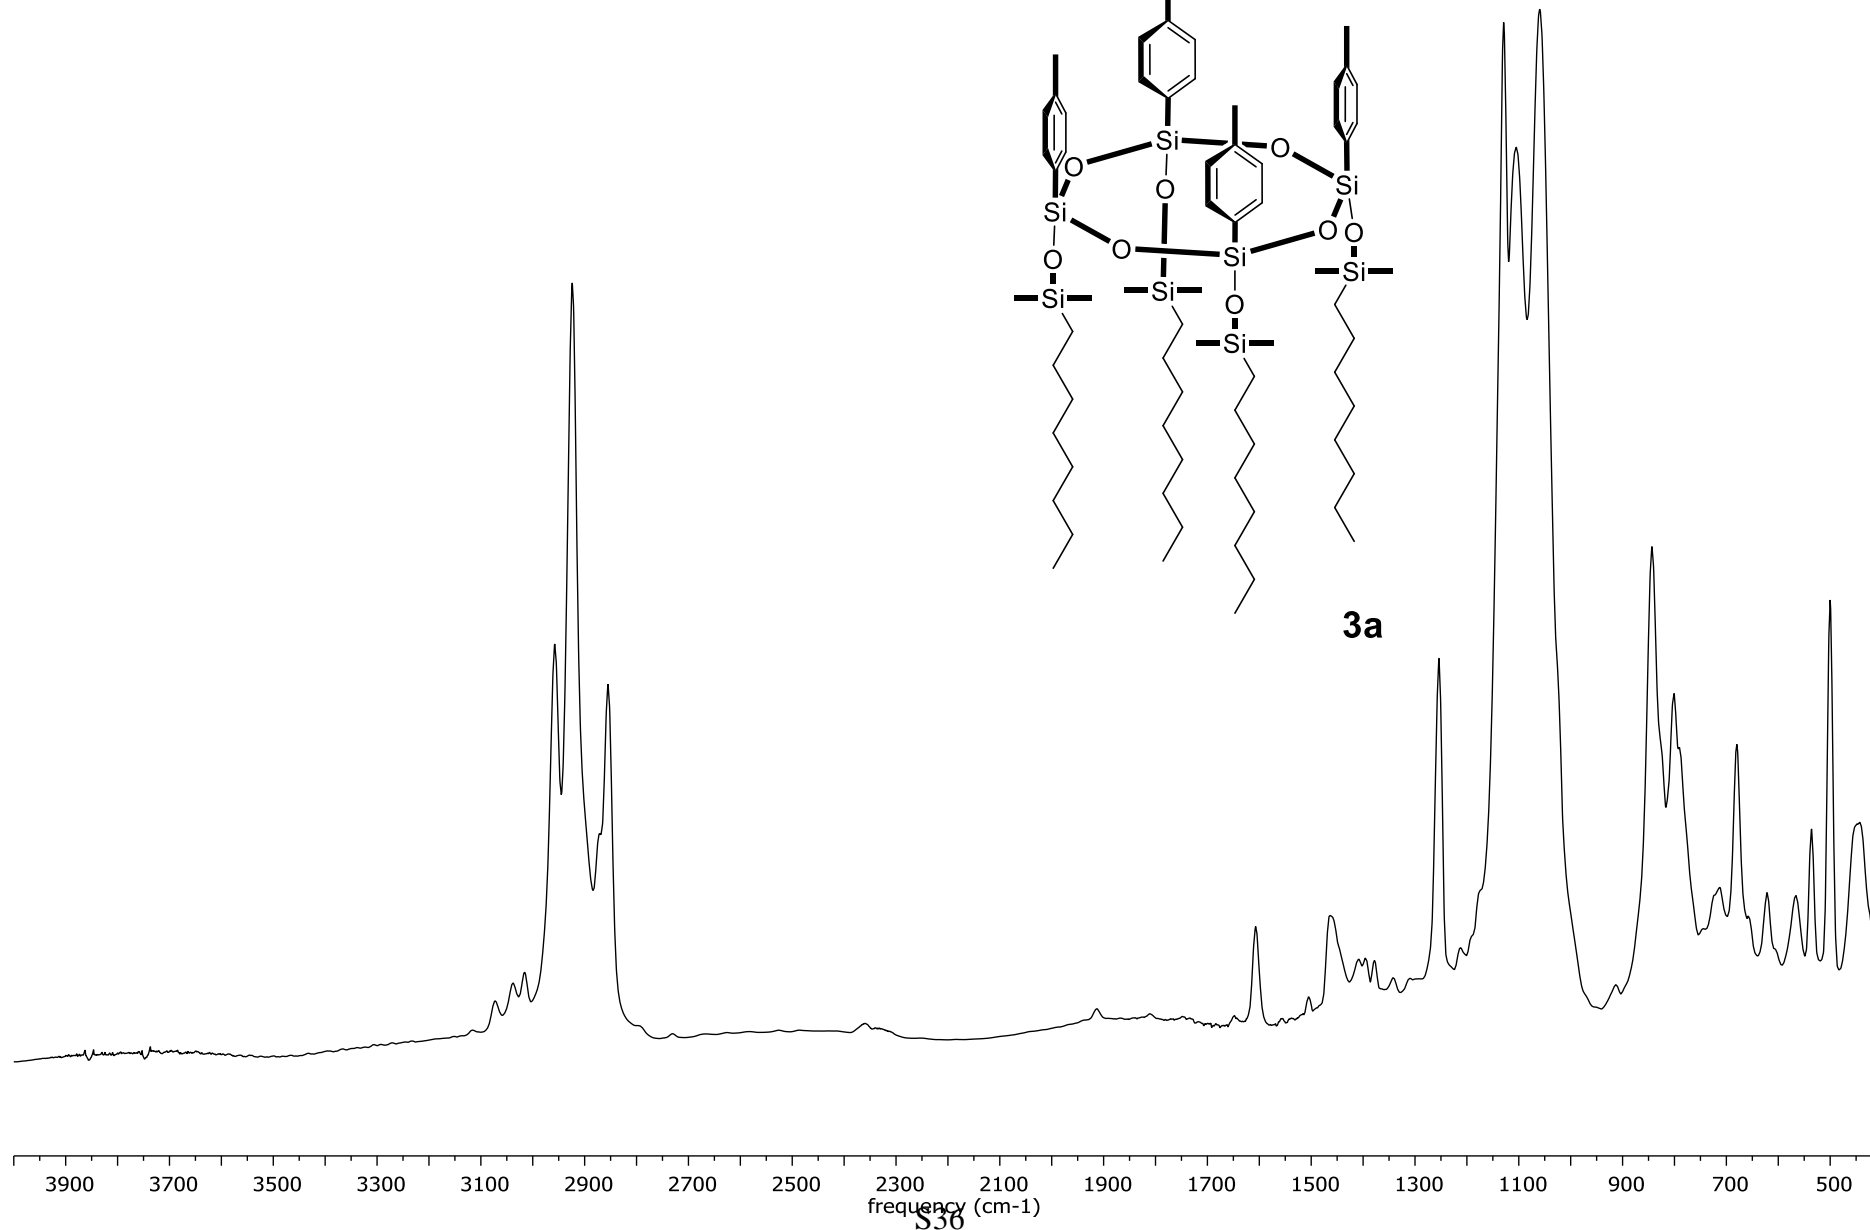

# HRMS (ESI)

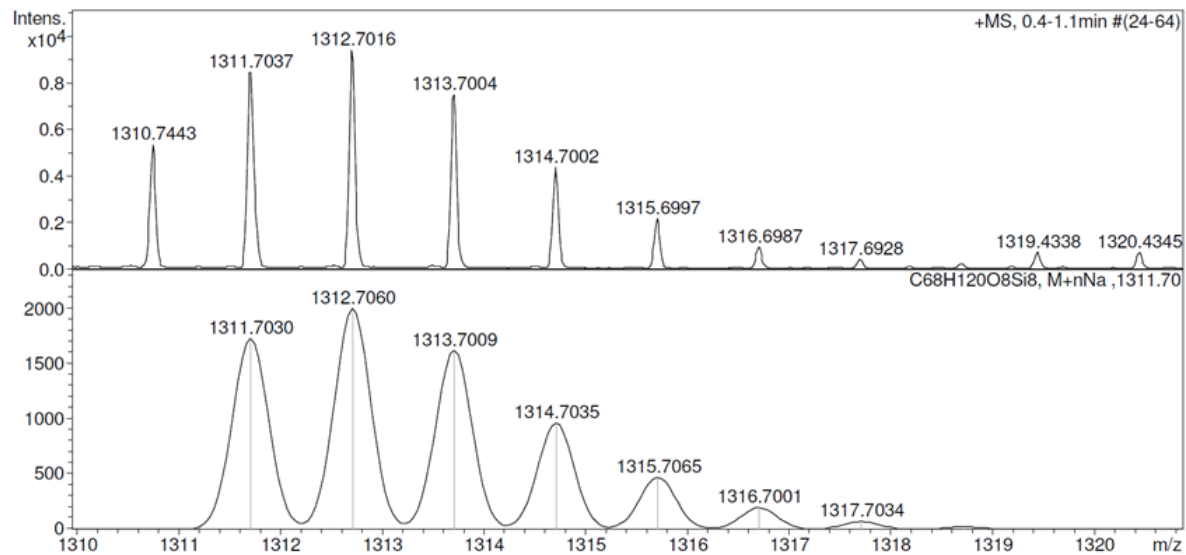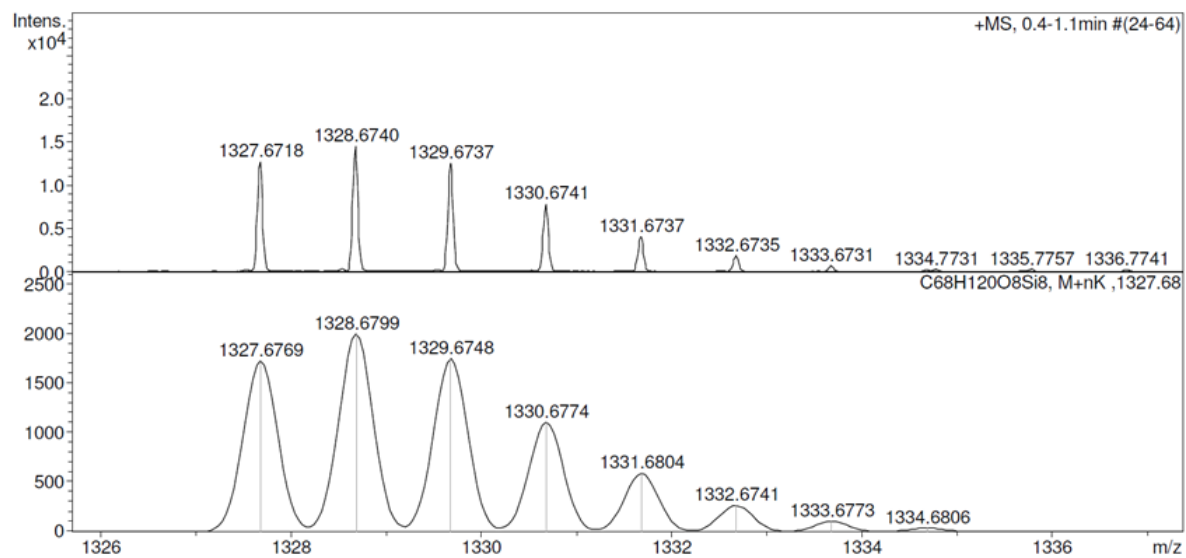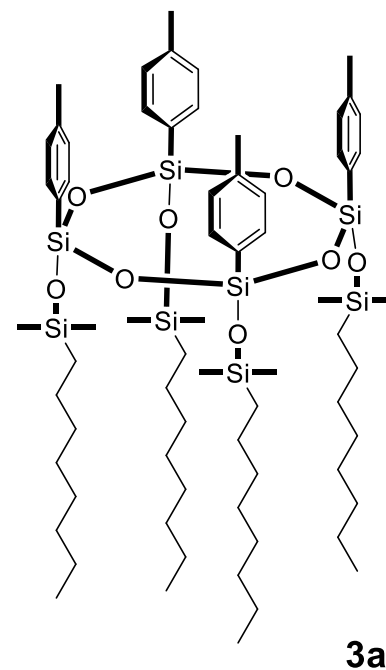

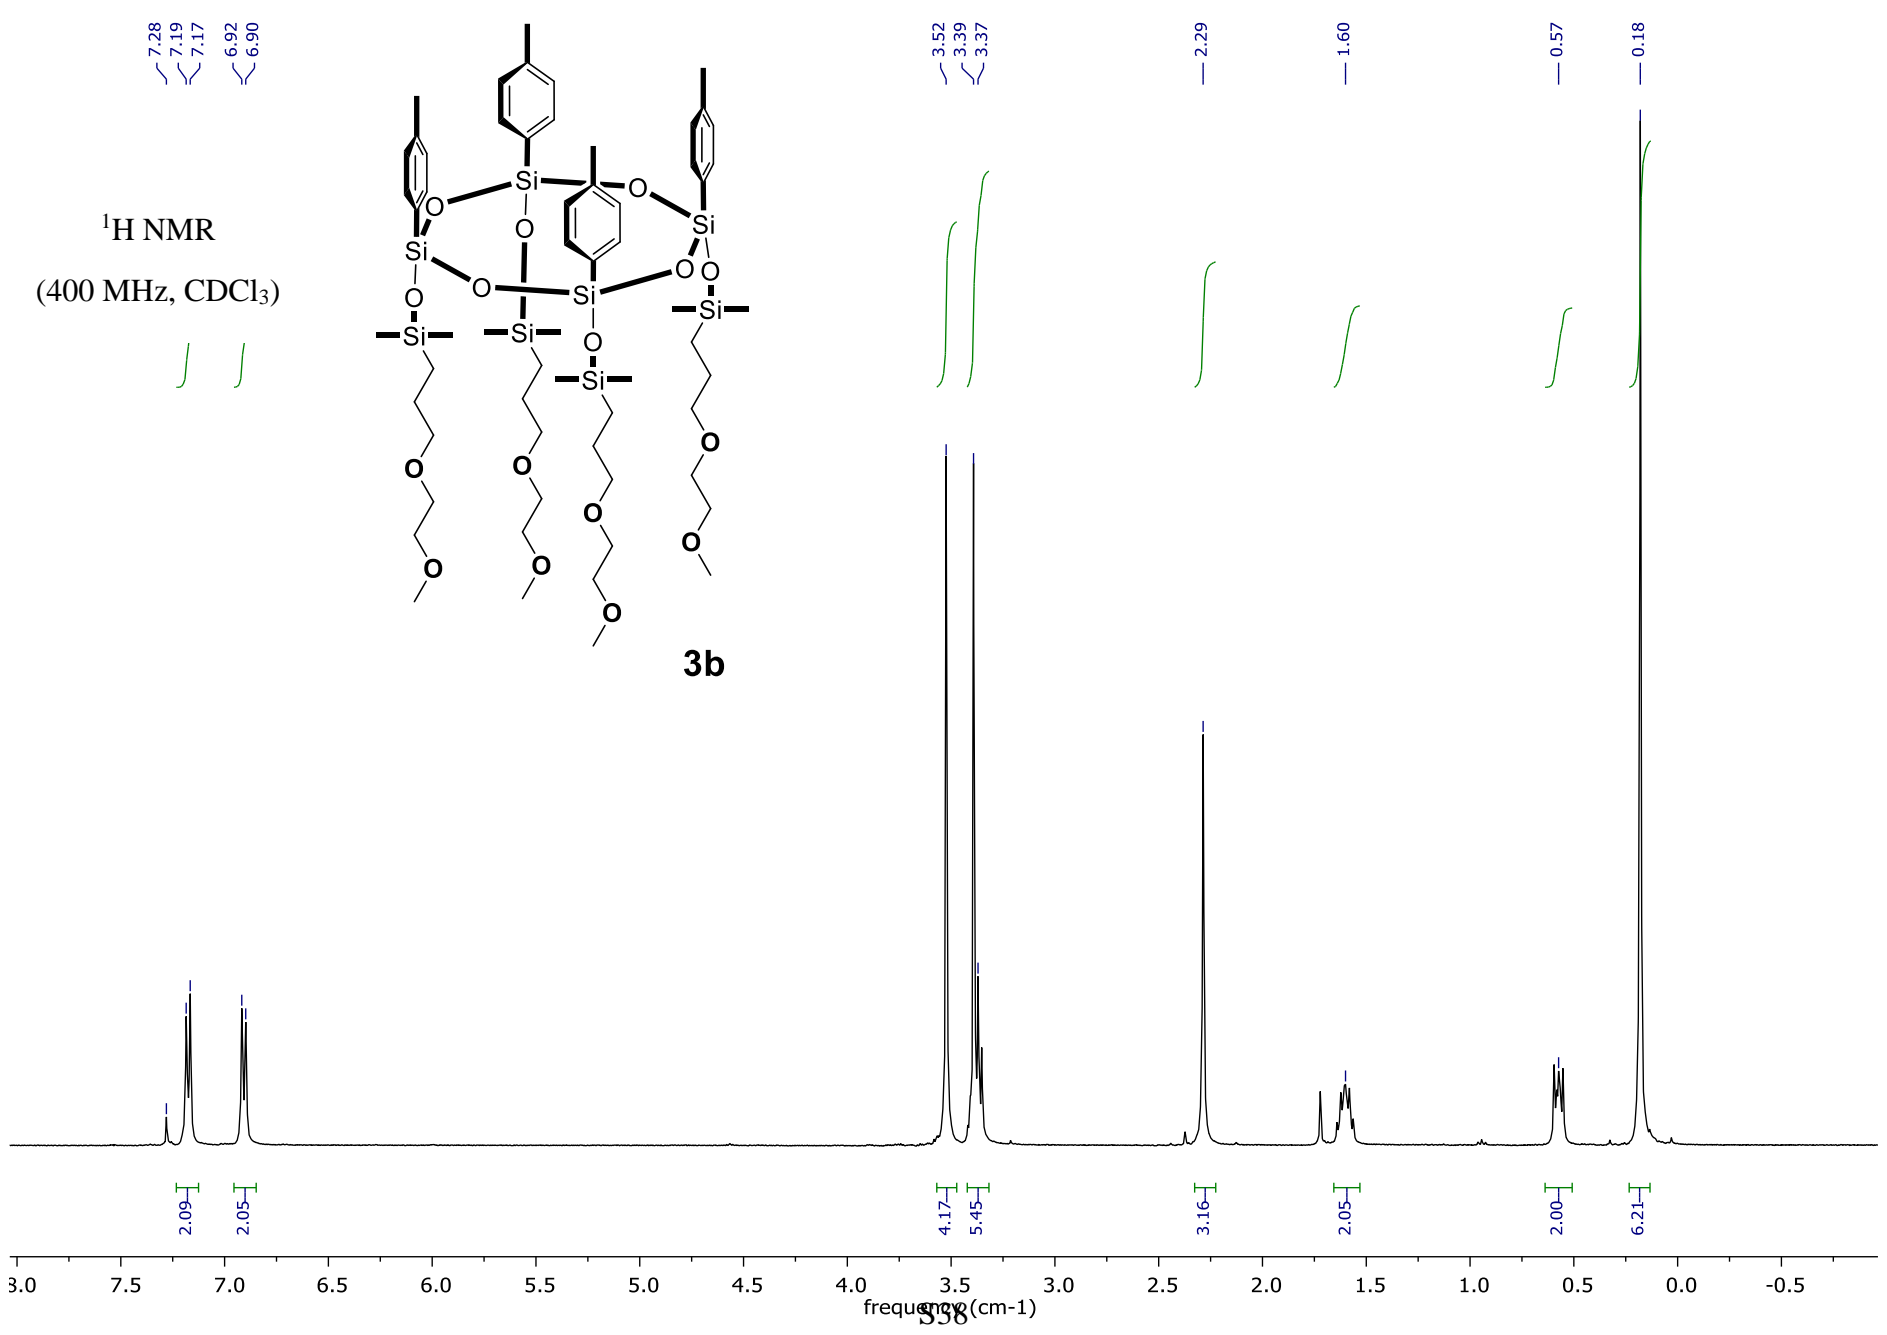

$^{13}\text{C}$  NMR  
(100 MHz,  $\text{CDCl}_3$ )

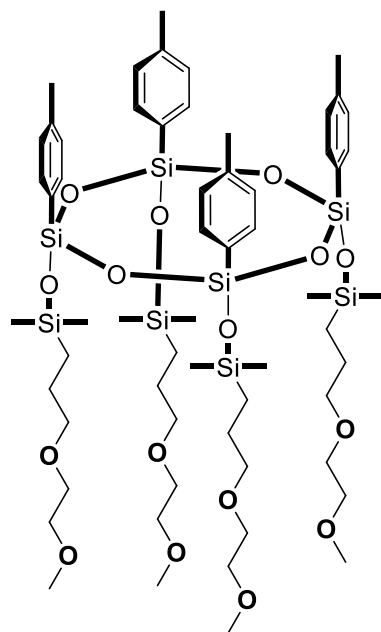

**3b**

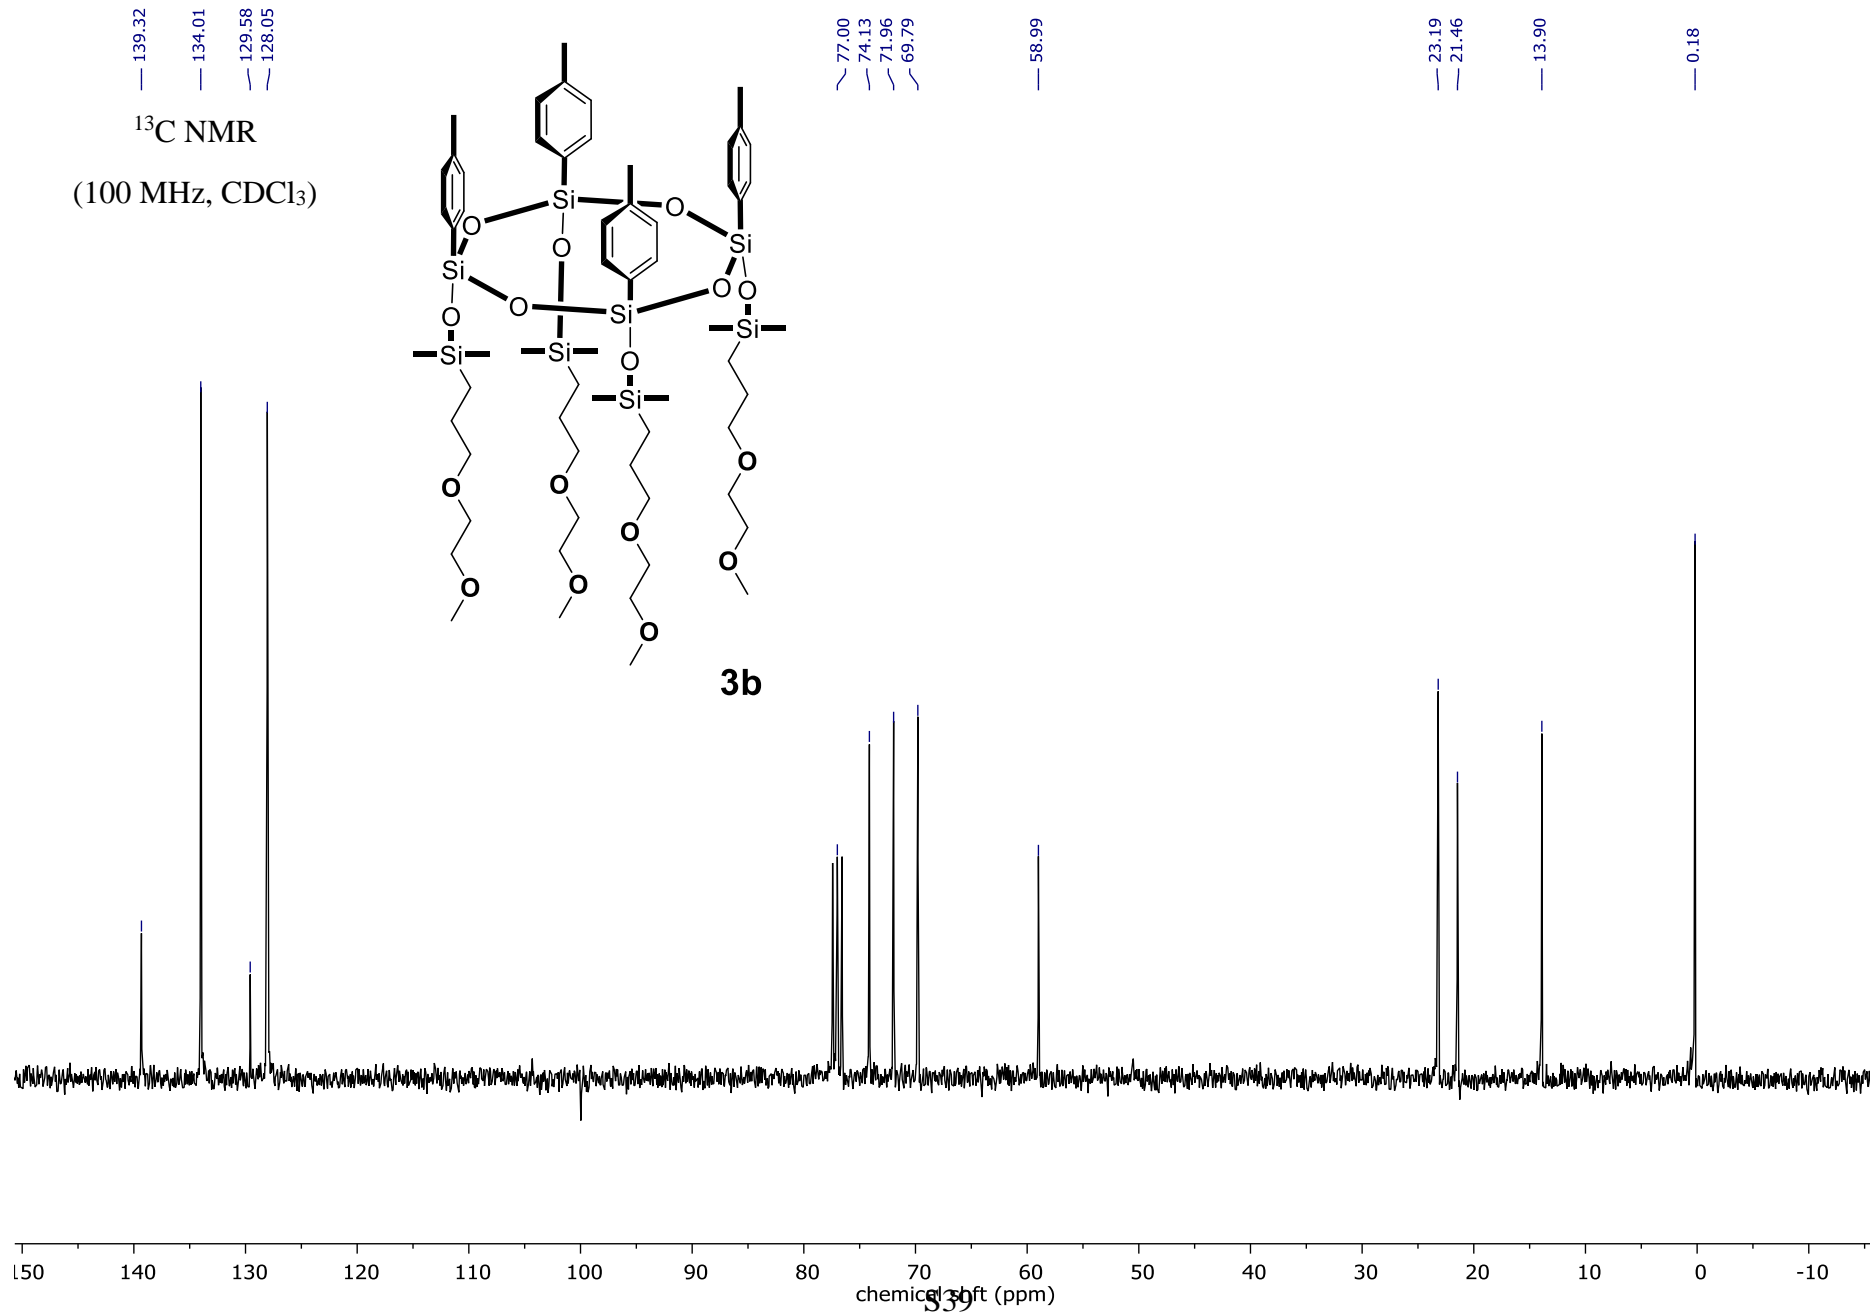

$^{29}\text{Si}$  NMR  
(80 MHz,  $\text{CDCl}_3$ )

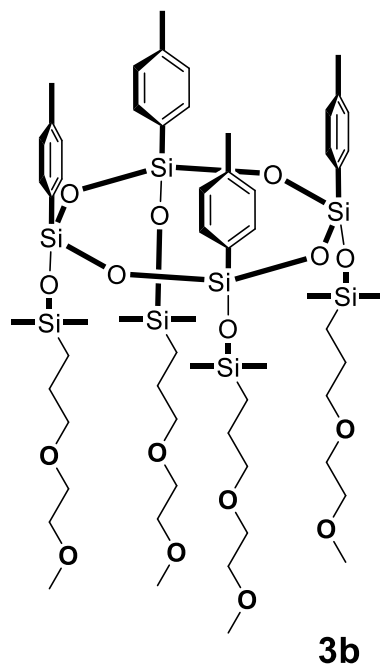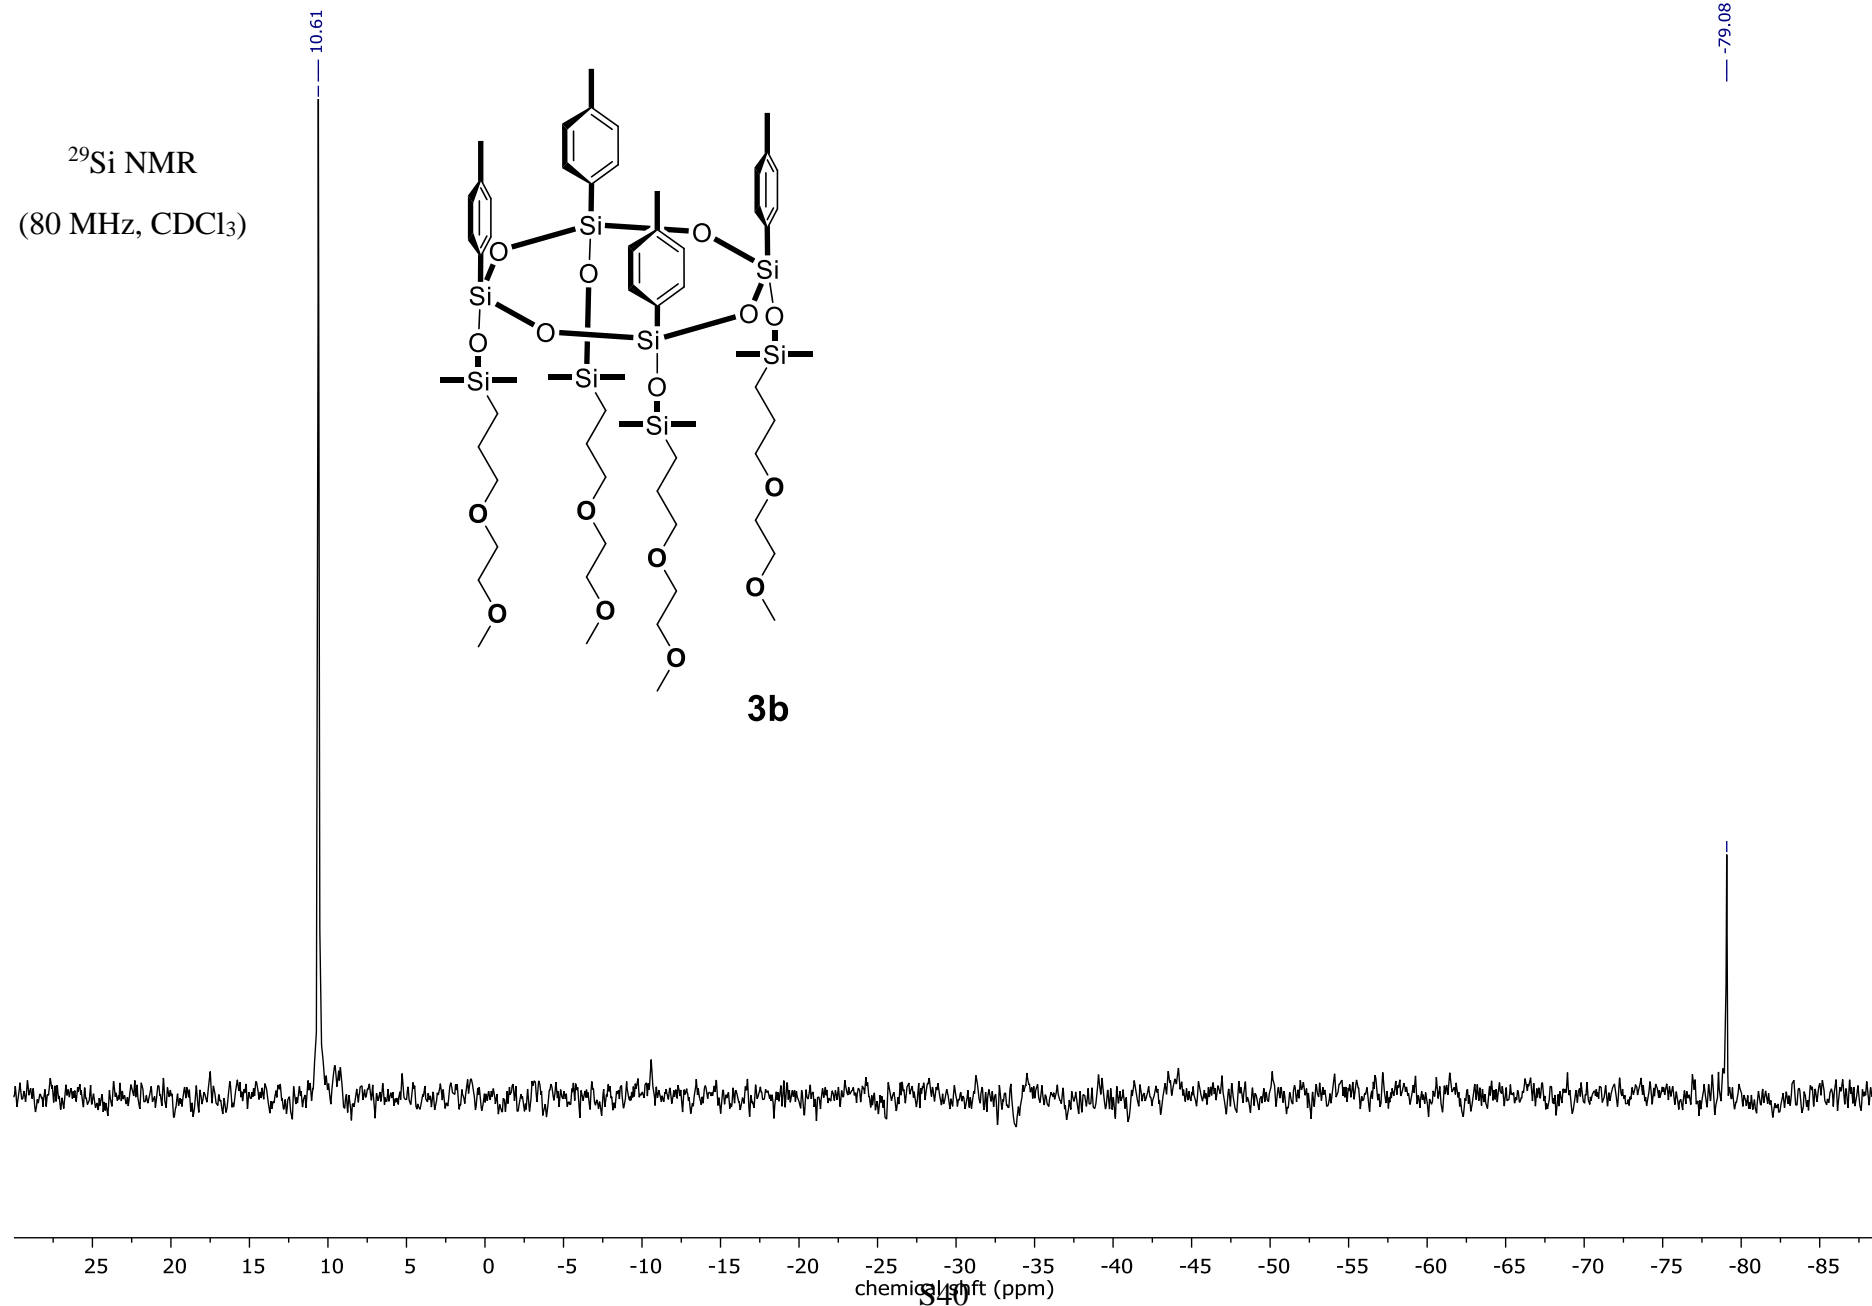



$^1\text{H}$ ,  $^{13}\text{C}$  edited-HSQC NMR,

( $^1\text{H}$ : 400 MHz,  $^{13}\text{C}$ : 100 MHz,

$\text{CDCl}_3$ )

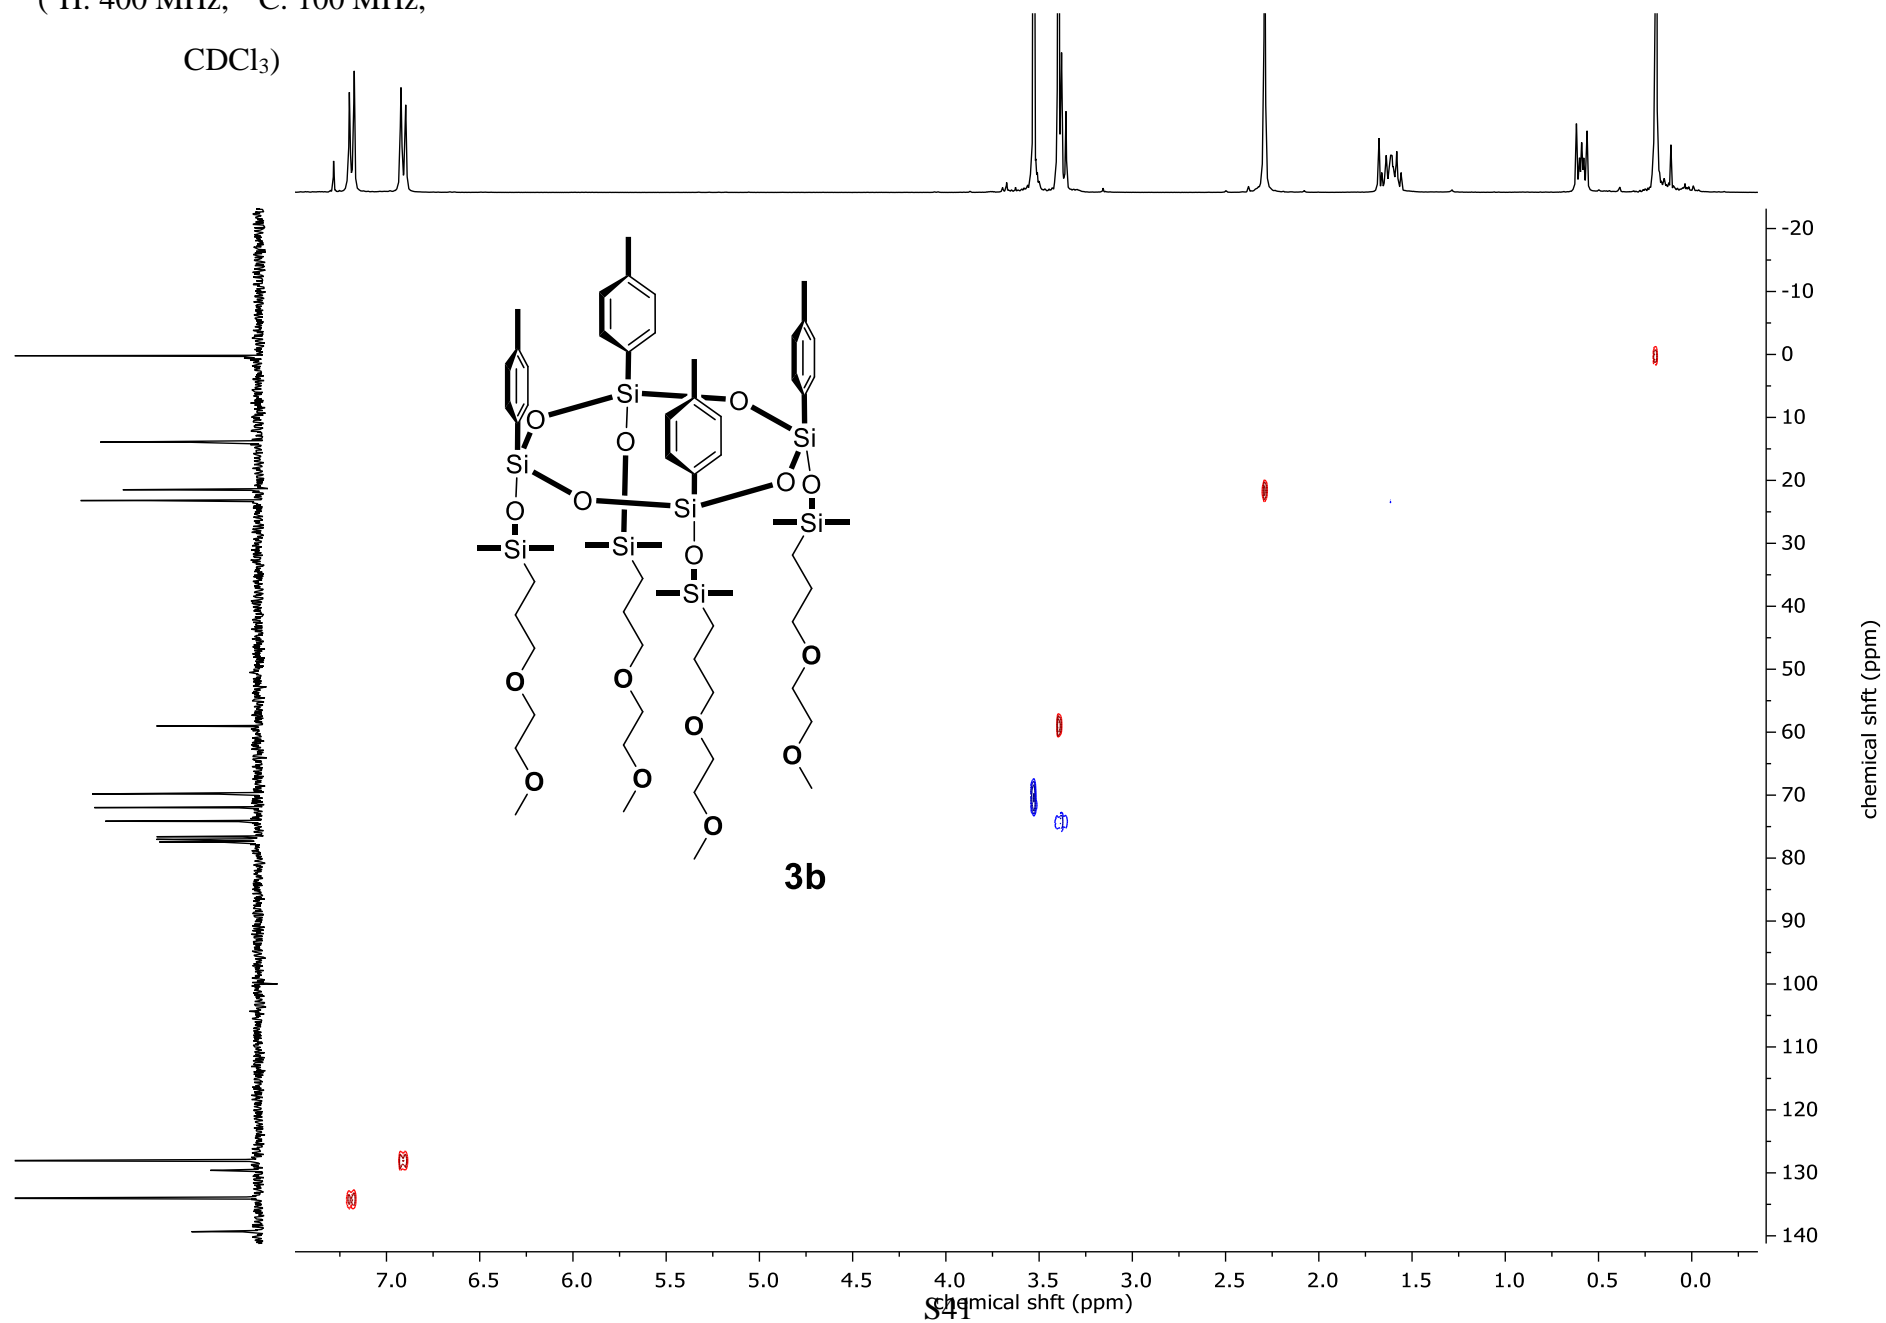

$^1\text{H}, ^{13}\text{C}$ -HMBC NMR,  
( $^1\text{H}$ : 400 MHz,  $^{13}\text{C}$ : 100 MHz,  
 $\text{CDCl}_3$ )

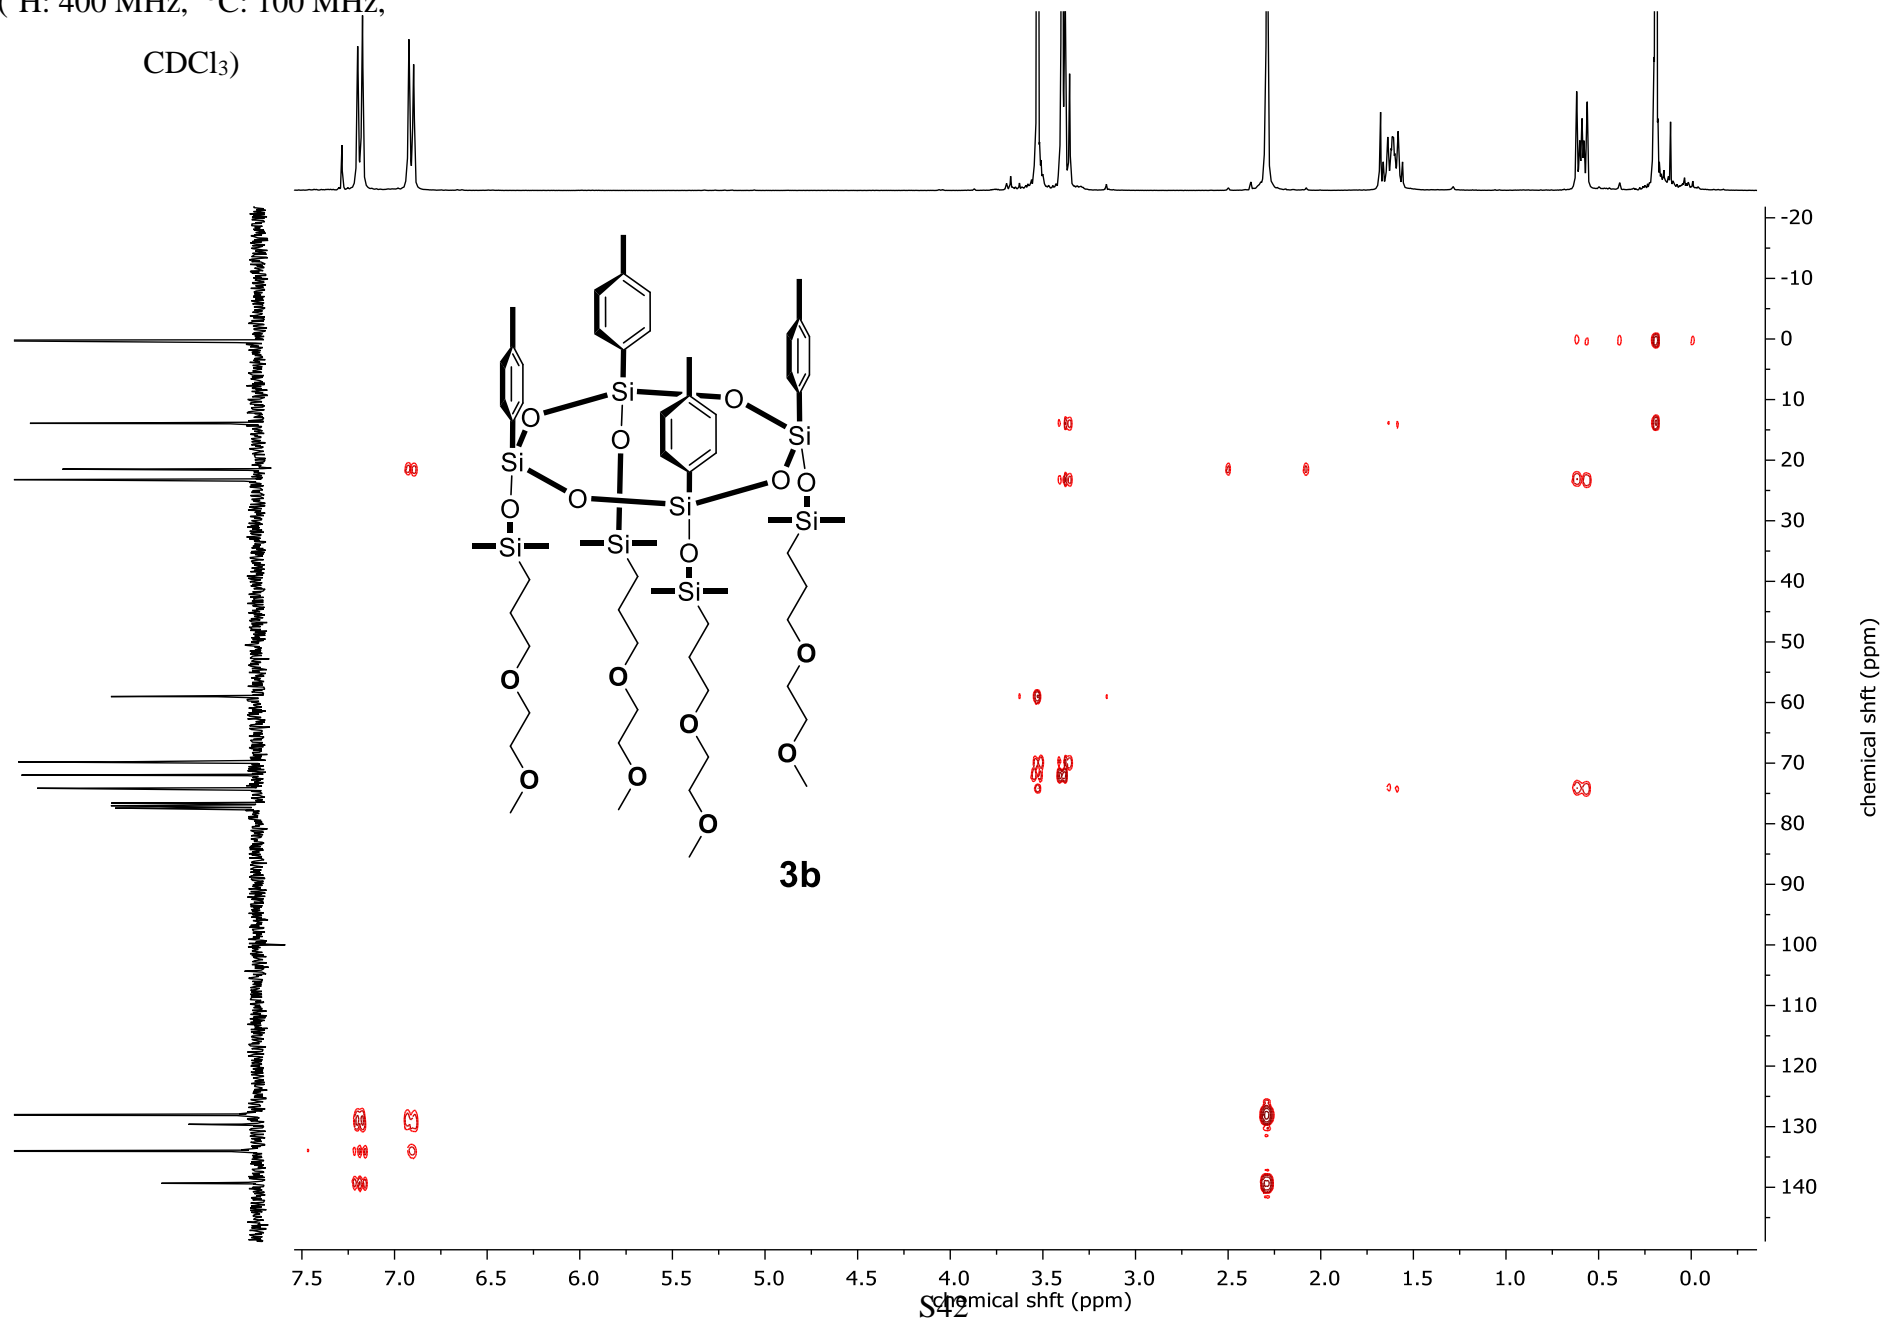

$^1\text{H}, ^{29}\text{Si}$ -HMBC NMR,

( $^1\text{H}$ : 400 MHz,  $^{29}\text{Si}$ : 80 MHz,

$\text{CDCl}_3$ )

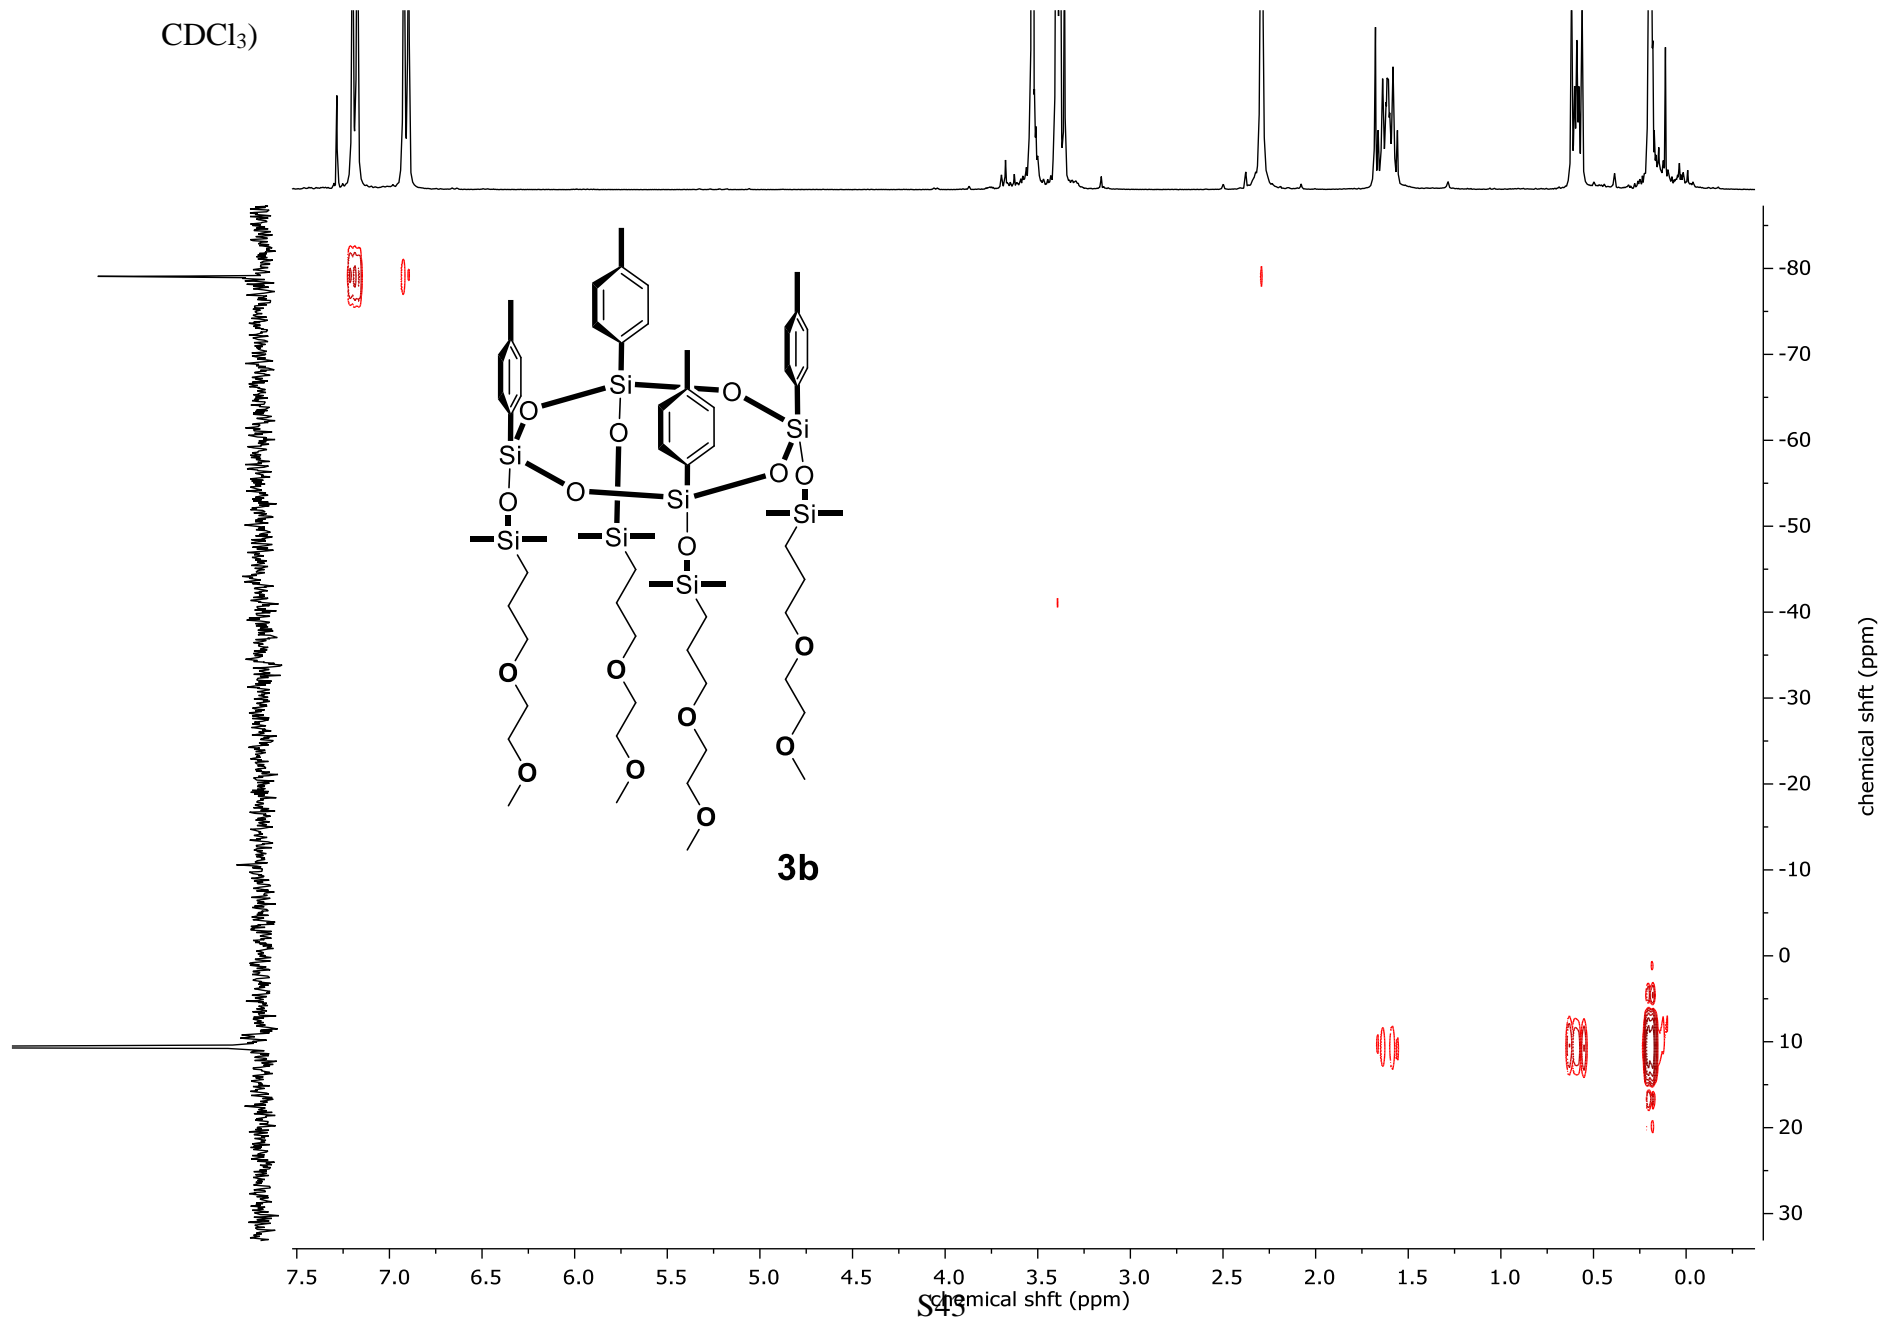

GPC

$M_n = 1321$  (pss)

$M_w = 1373$  (pss)

PDI = 1.04

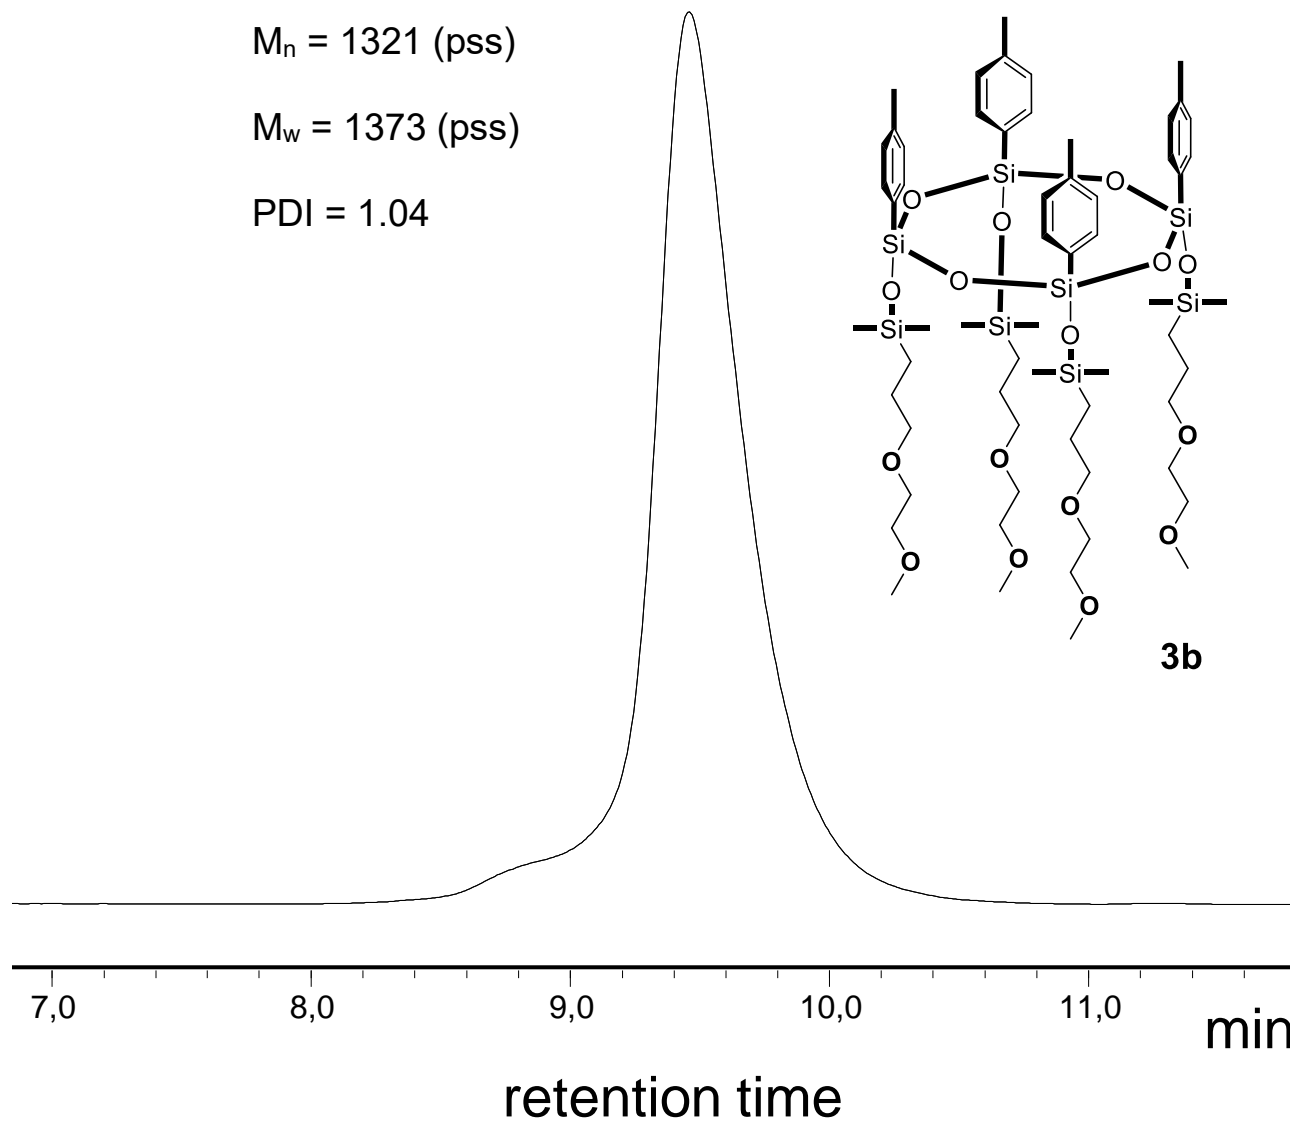

IR-spectrum

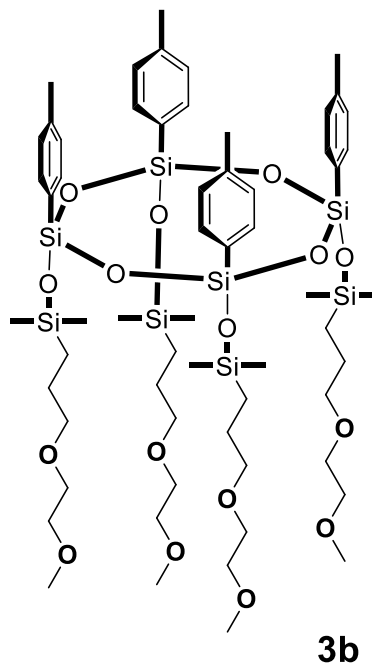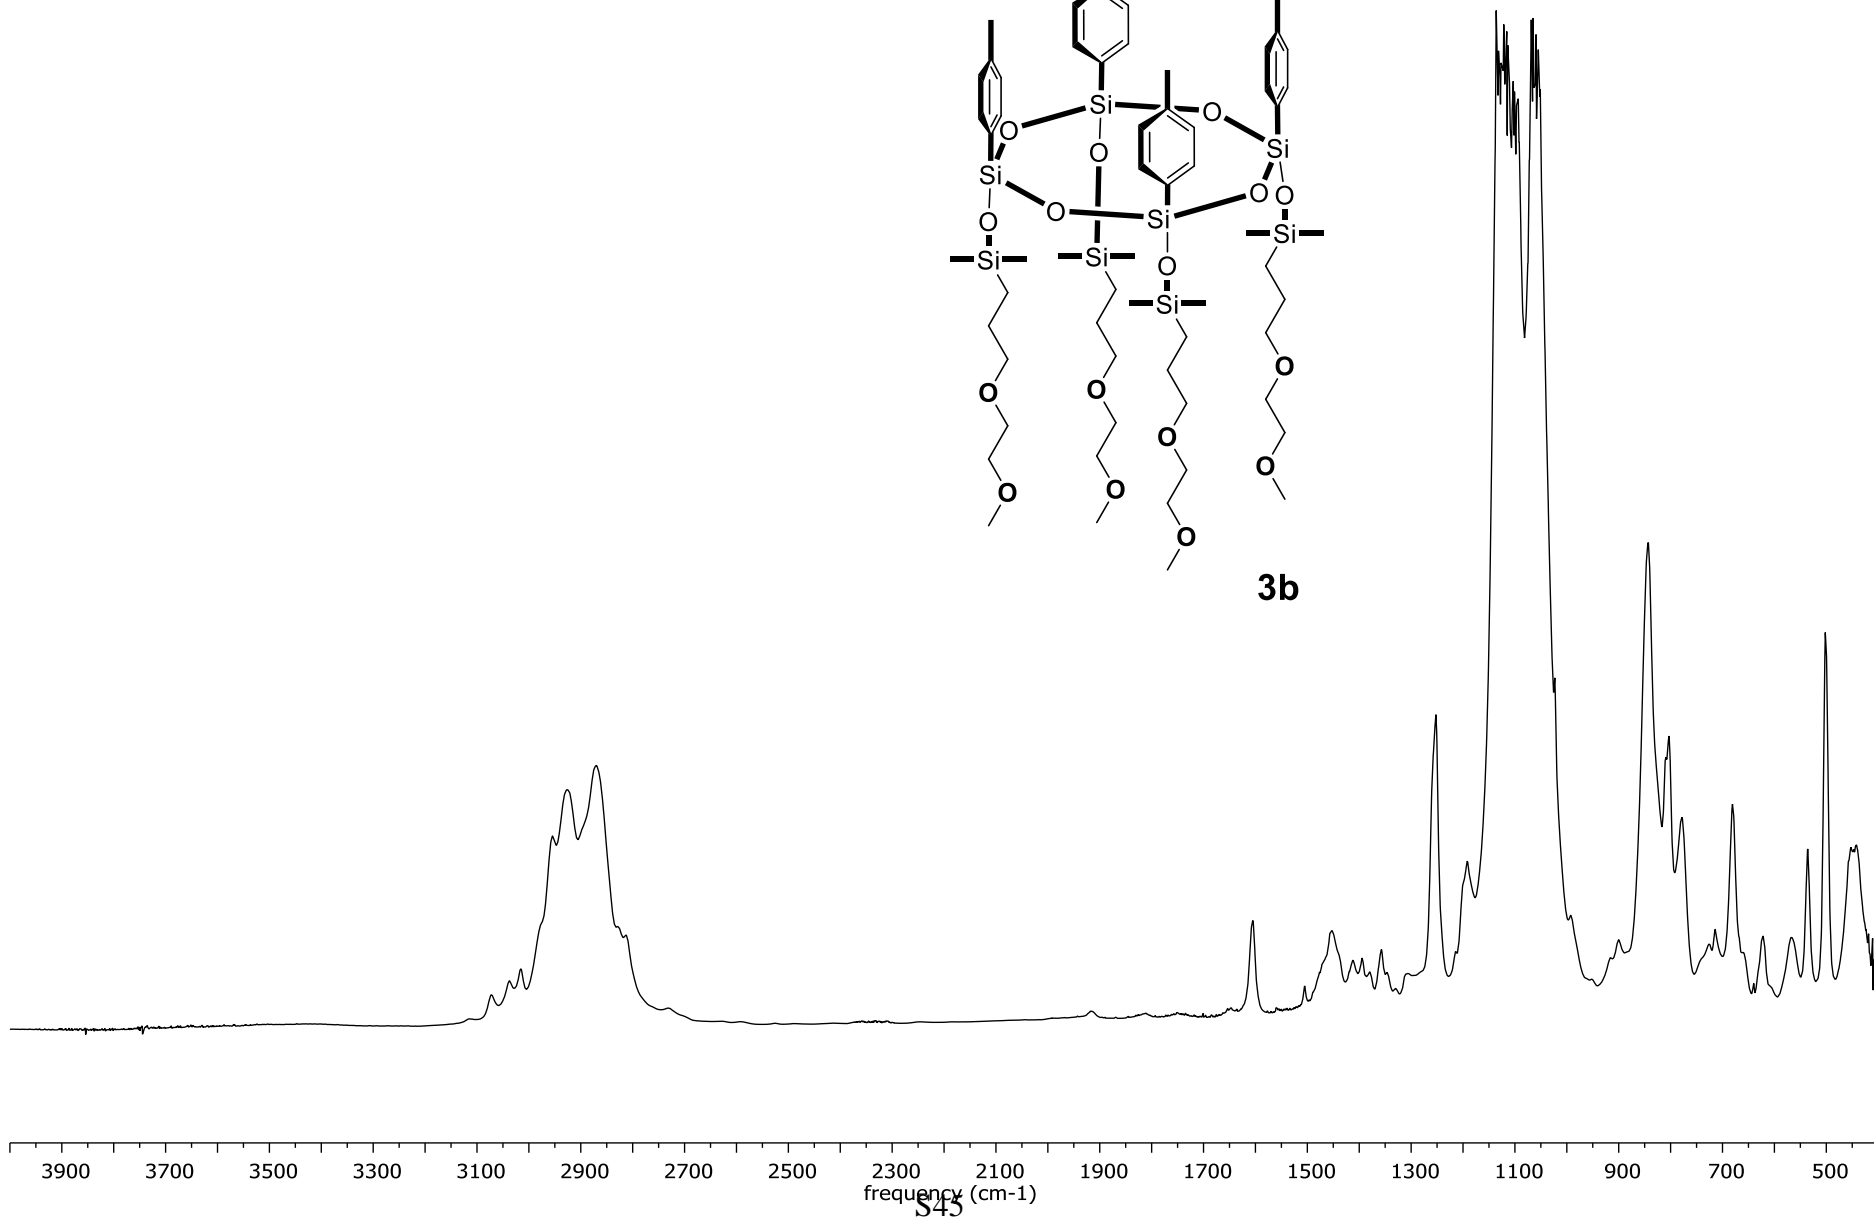

HRMS (ESI)

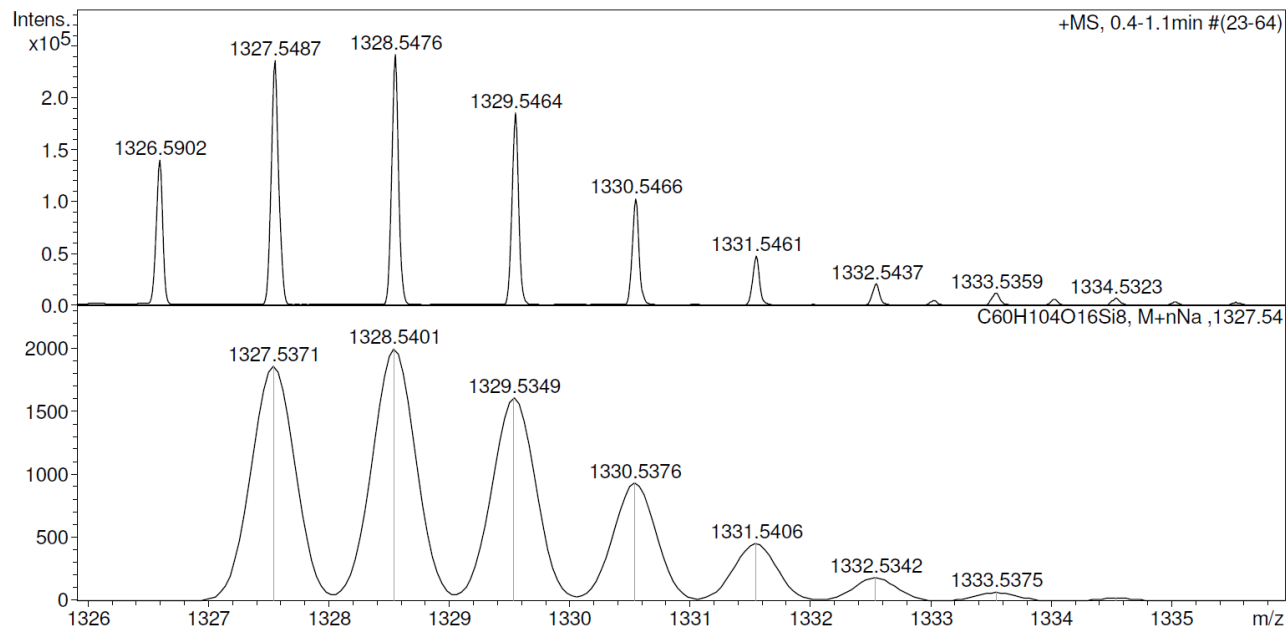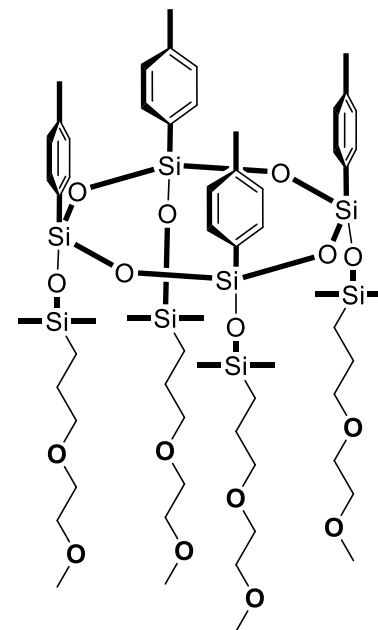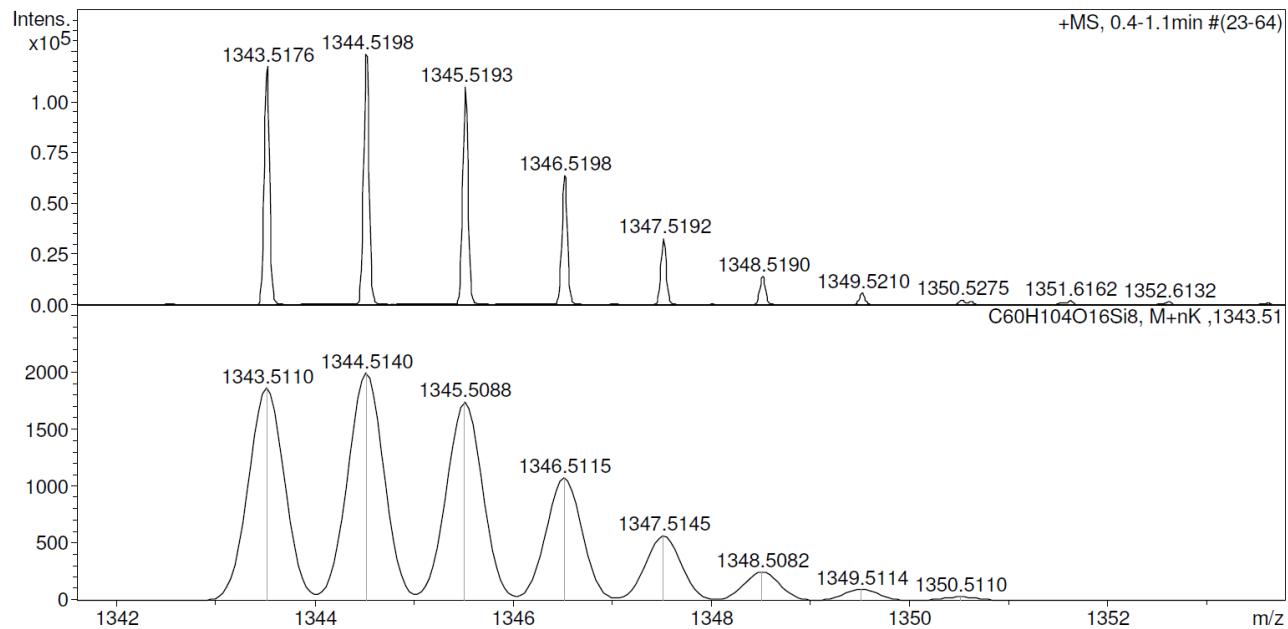

$^1\text{H}$  NMR  
(400 MHz,  $\text{CDCl}_3$ )

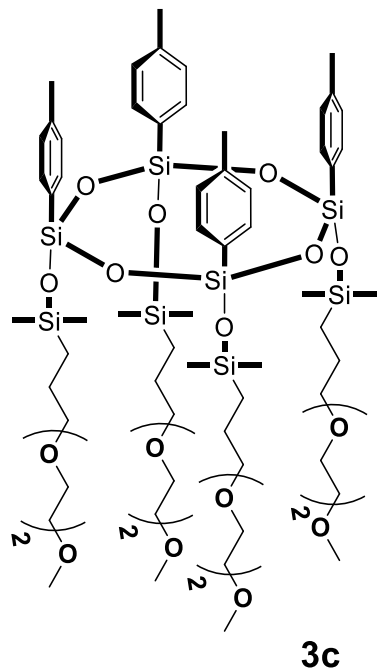

7.28  
7.19  
7.16  
6.92  
6.89

3.64  
3.57  
3.39

2.28

1.58

0.57

0.18

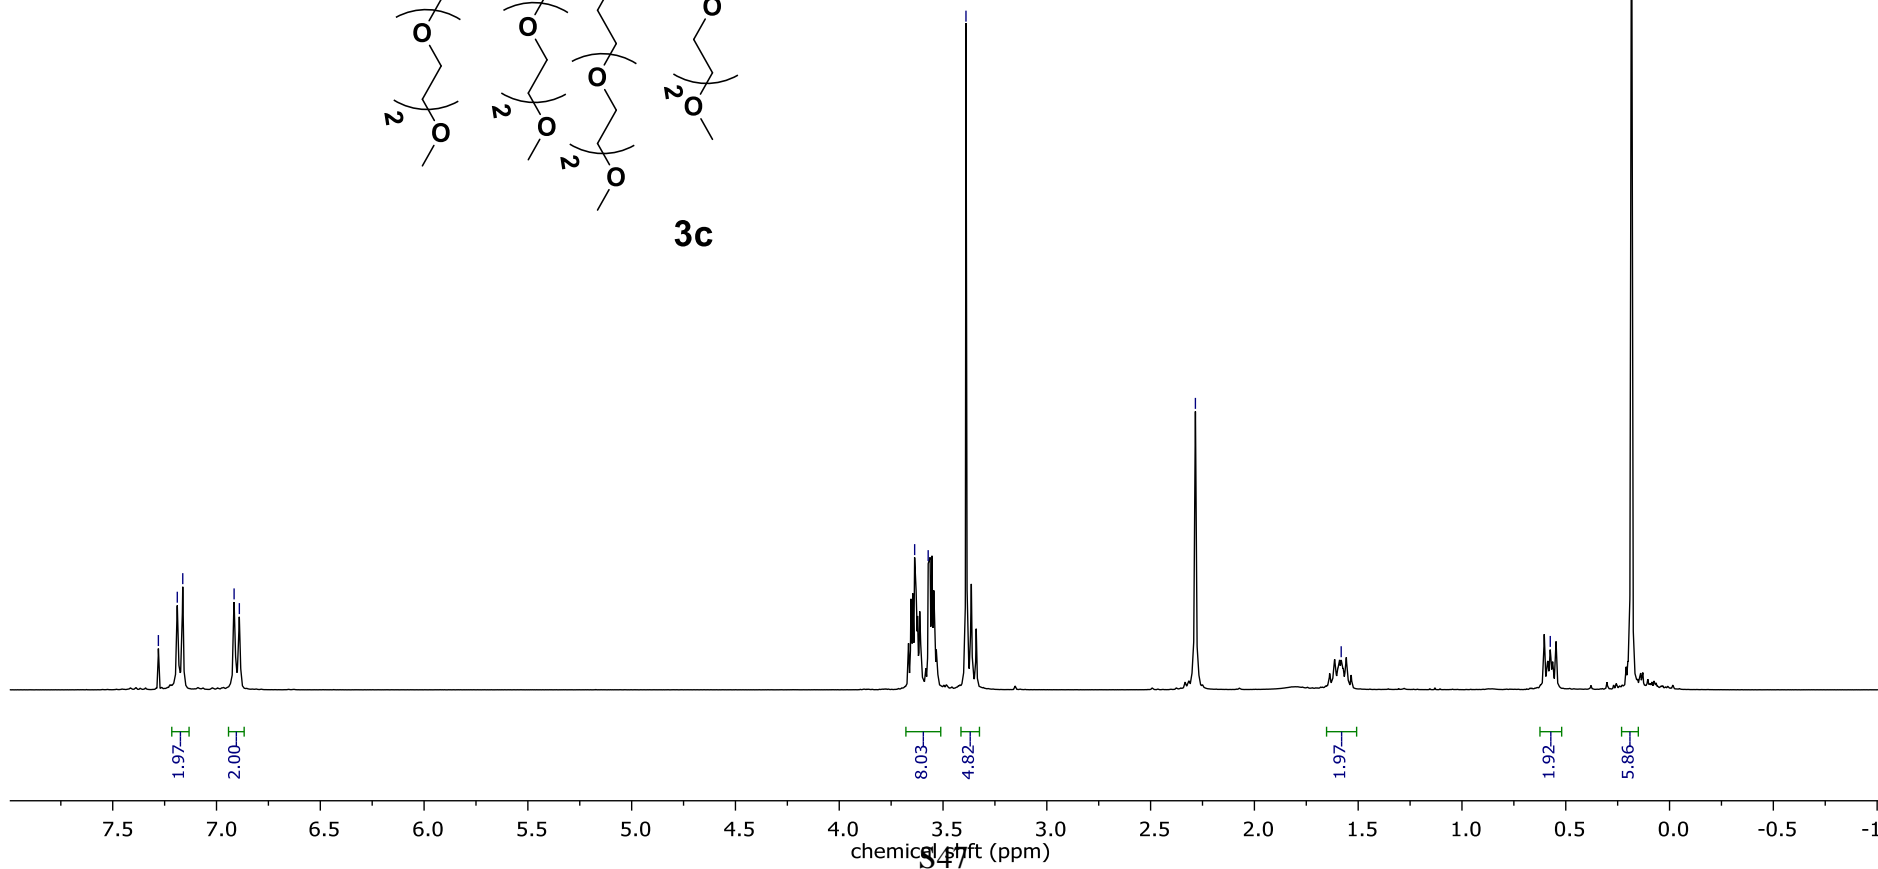

<sup>13</sup>C NMR  
(100 MHz, CDCl<sub>3</sub>)

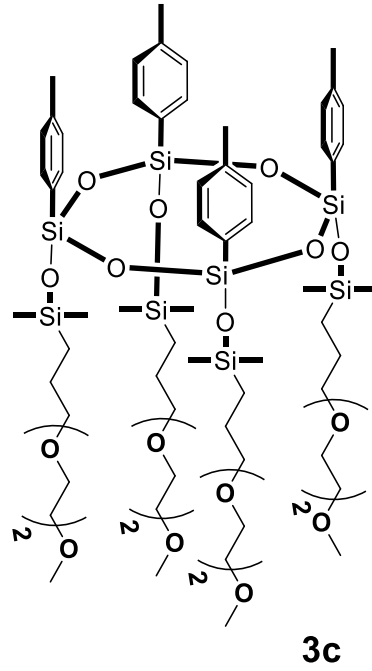

— 139.33  
— 134.00  
— 129.57  
— 128.06

— 77.00  
— 74.06  
— 71.94  
— 70.50  
— 69.90

— 58.97

— 23.21  
— 21.46

— 13.92

— 0.19

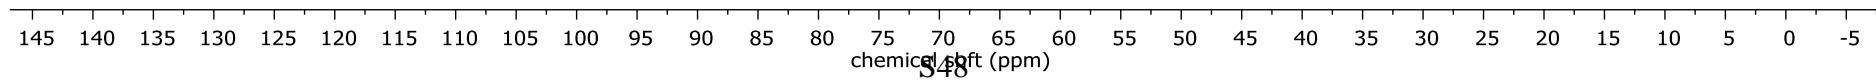



$^{29}\text{Si}$  NMR  
(80 MHz,  $\text{CDCl}_3$ )

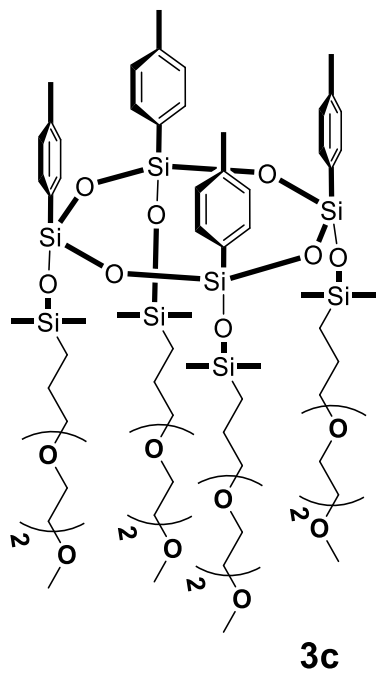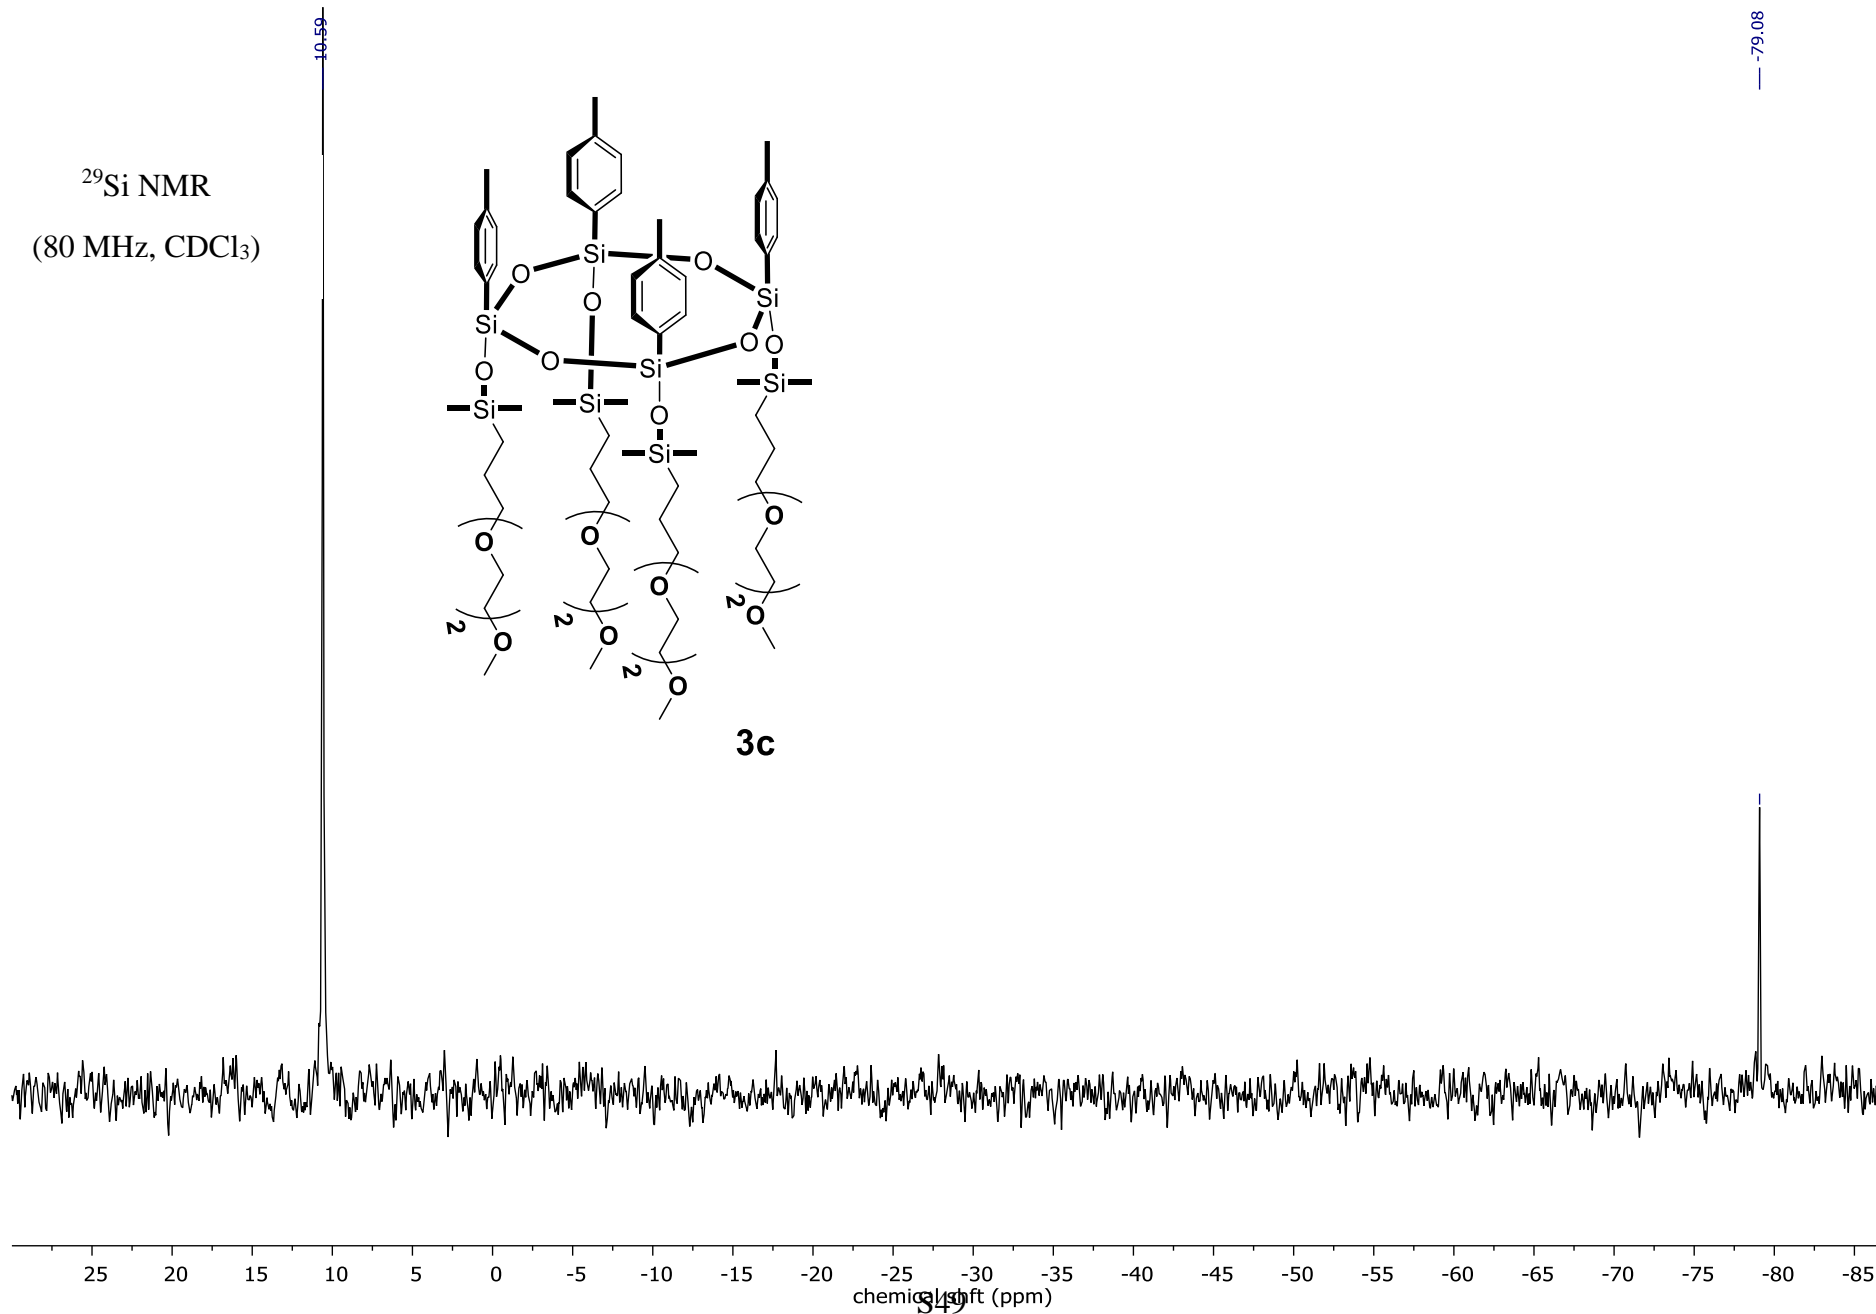

$^1\text{H}$ ,  $^{13}\text{C}$  edited-HSQC NMR,  
( $^1\text{H}$ : 400 MHz,  $^{13}\text{C}$ : 100 MHz,  
 $\text{CDCl}_3$ )

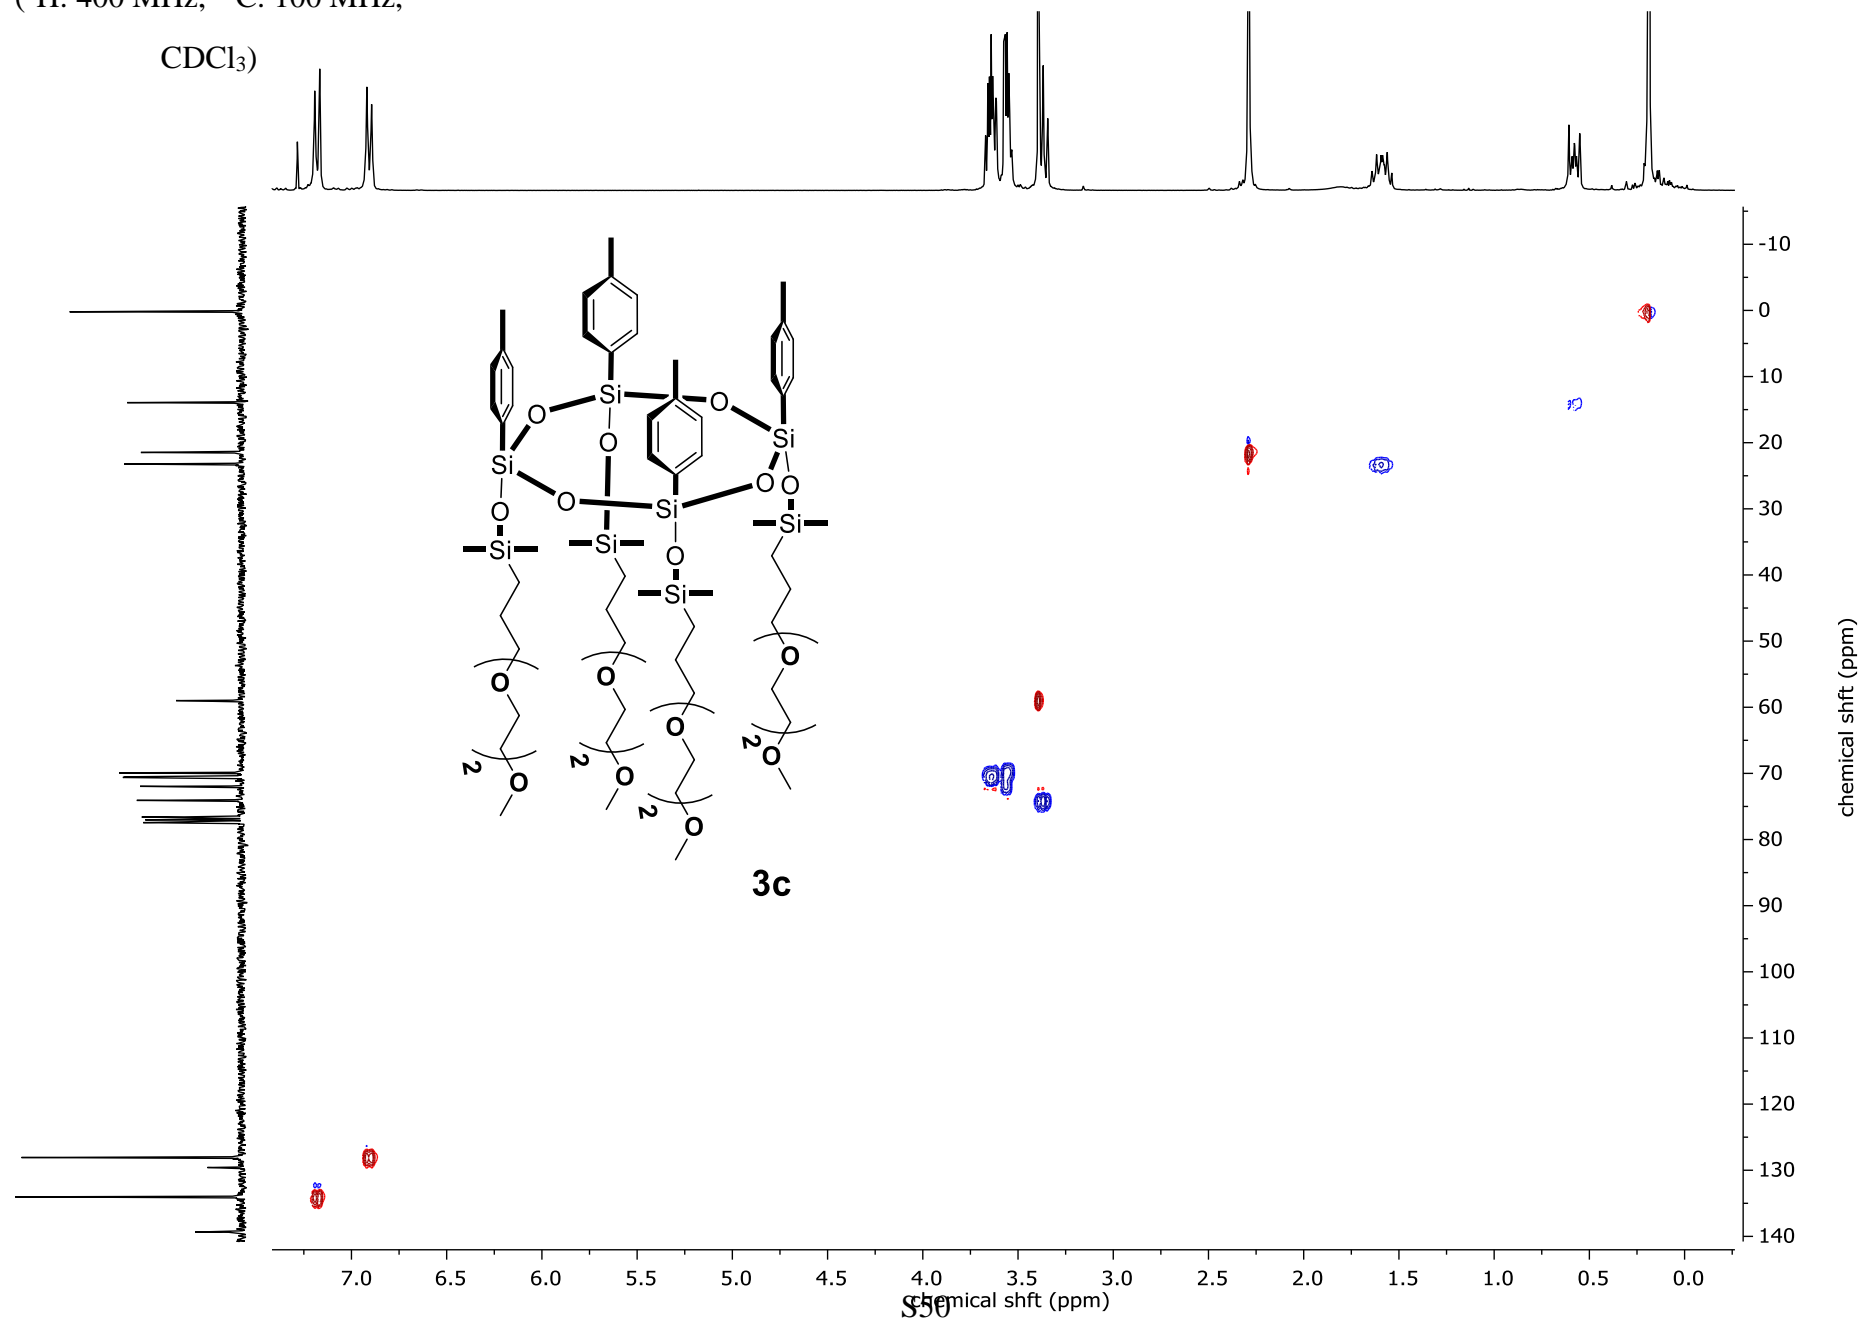

$^1\text{H}, ^{13}\text{C}$ -HMBC NMR,  
( $^1\text{H}$ : 400 MHz,  $^{13}\text{C}$ : 100 MHz,  
 $\text{CDCl}_3$ )

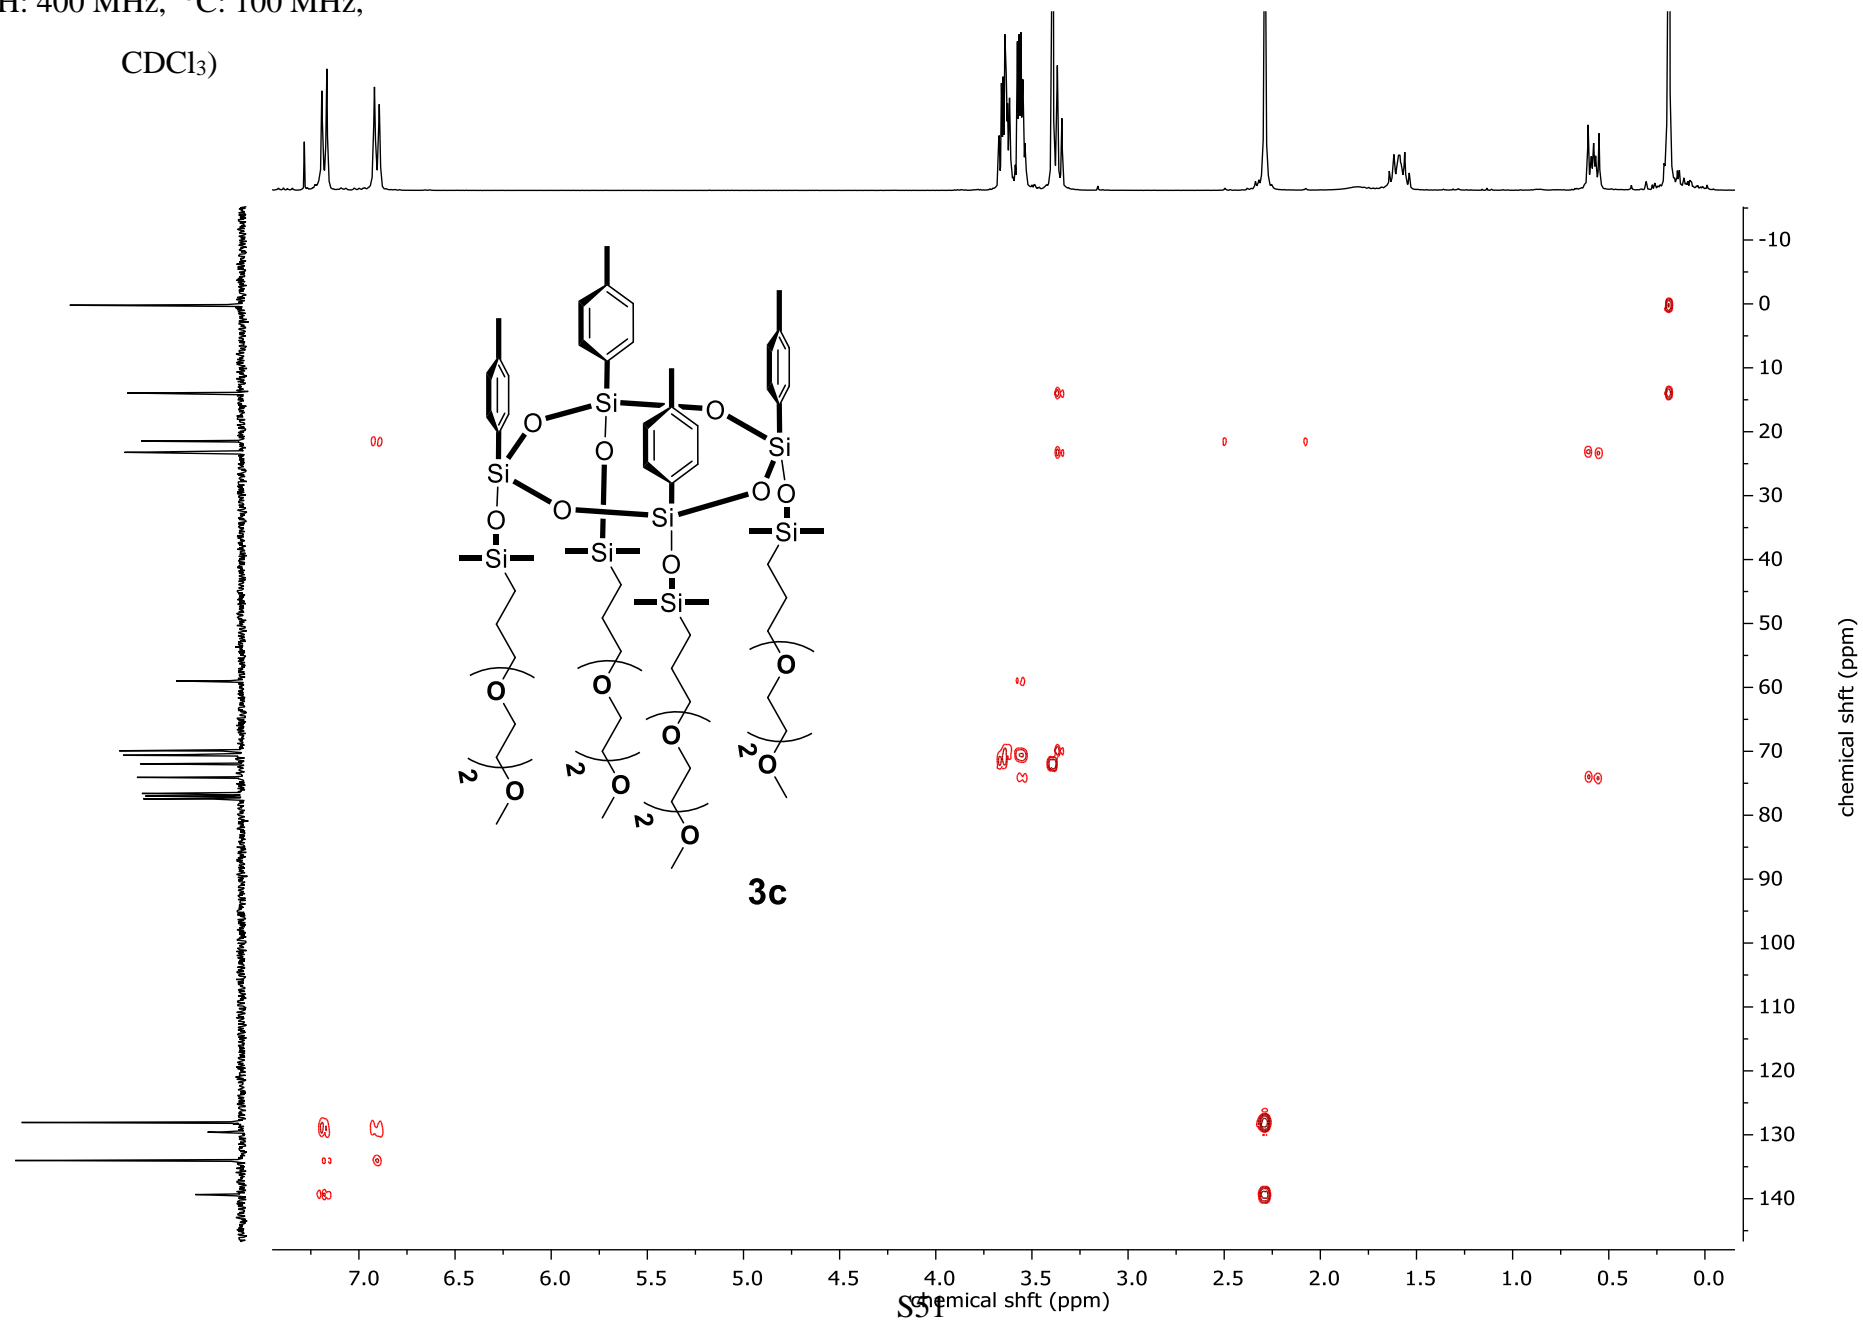

$^1\text{H}, ^{29}\text{Si}$ -HMBC NMR,  
( $^1\text{H}$ : 400 MHz,  $^{29}\text{Si}$ : 80 MHz,  
 $\text{CDCl}_3$ )

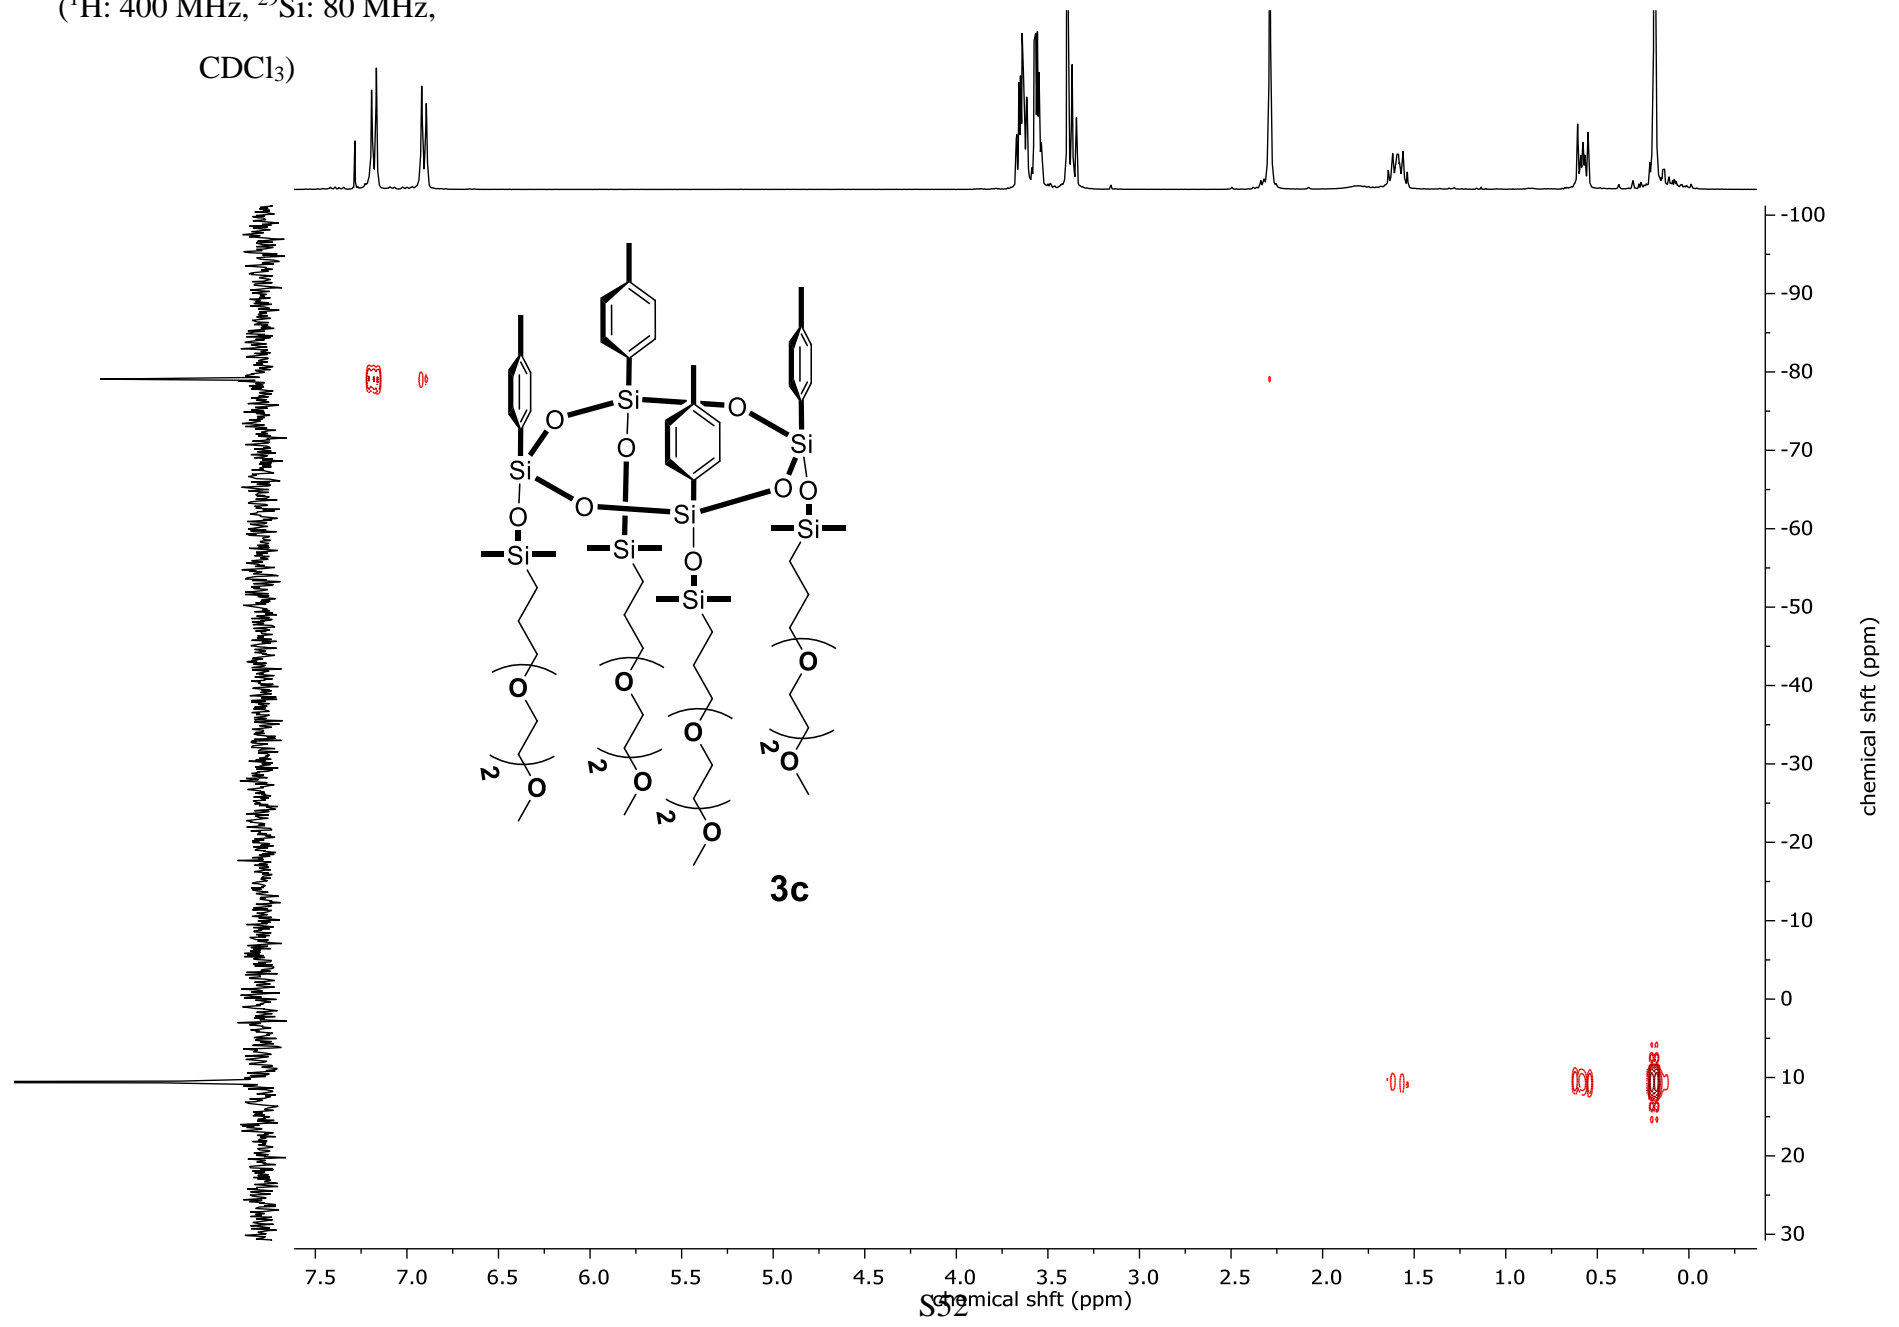

GPC

$M_n = 1465$  (pss)

$M_w = 1589$  (pss)

PDI = 1.05

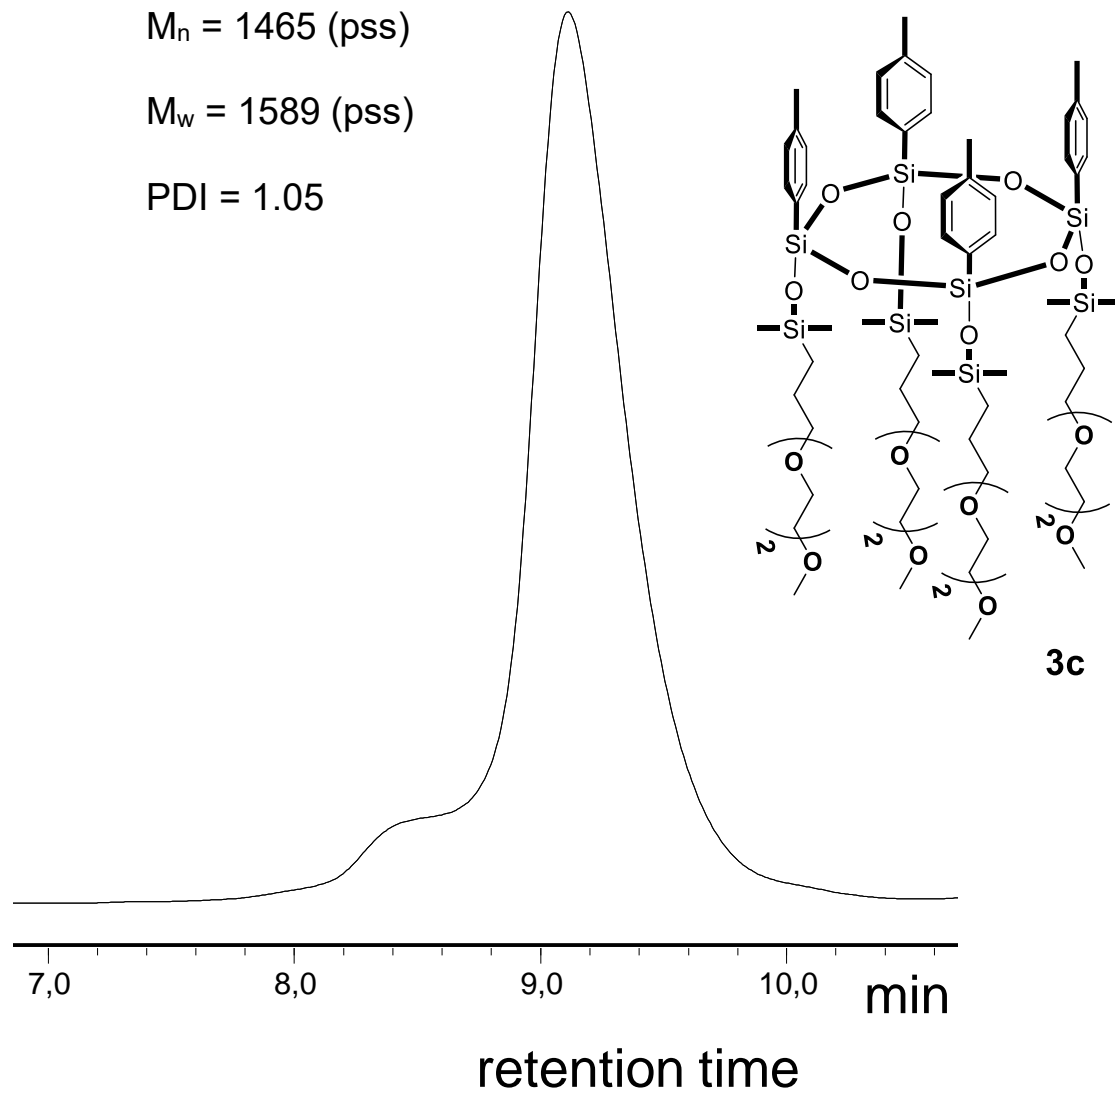

IR-spectrum

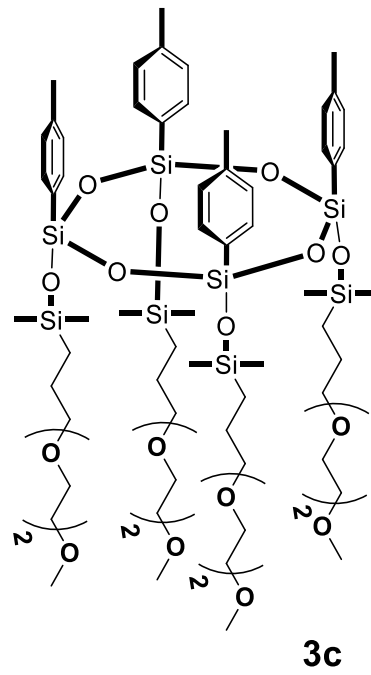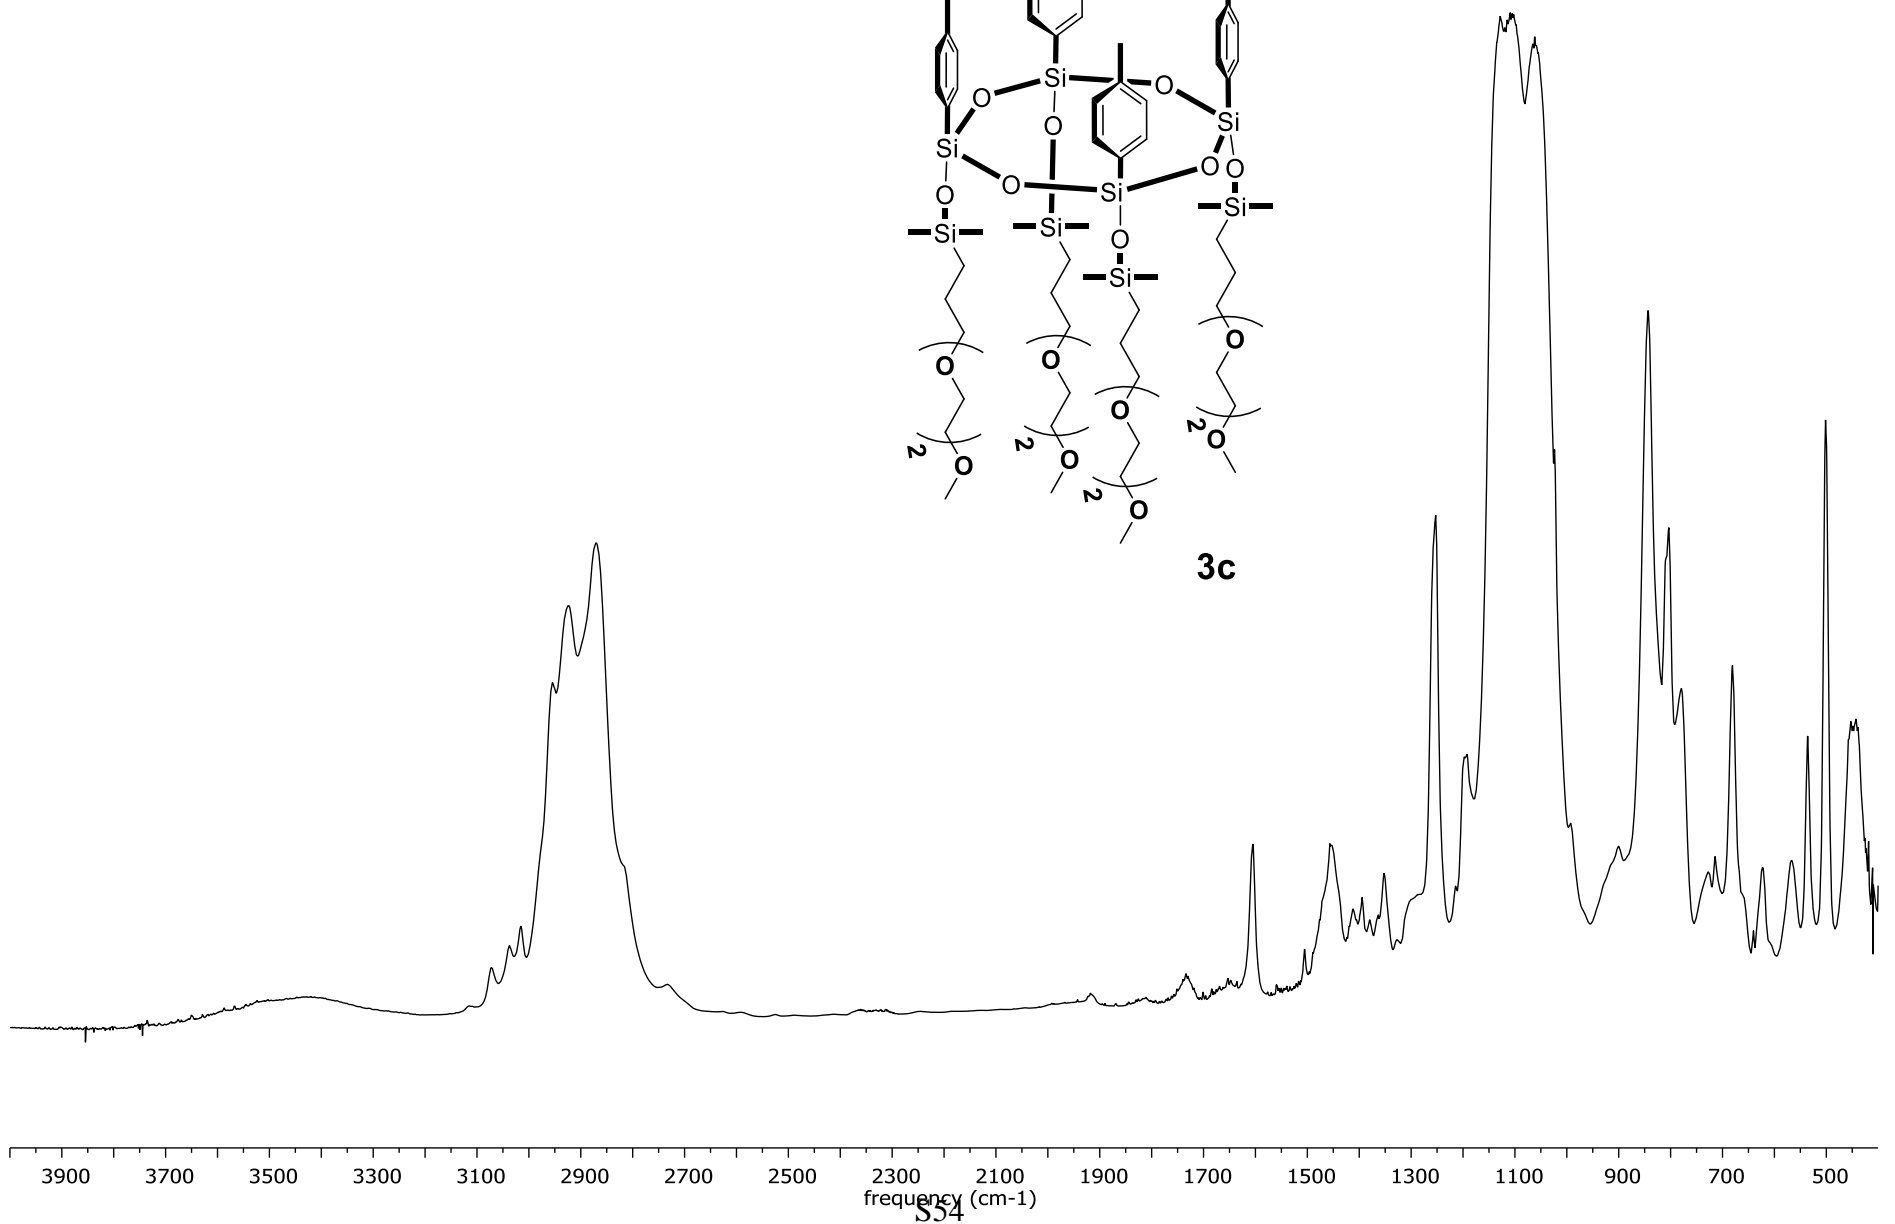

# HRMS (ESI)

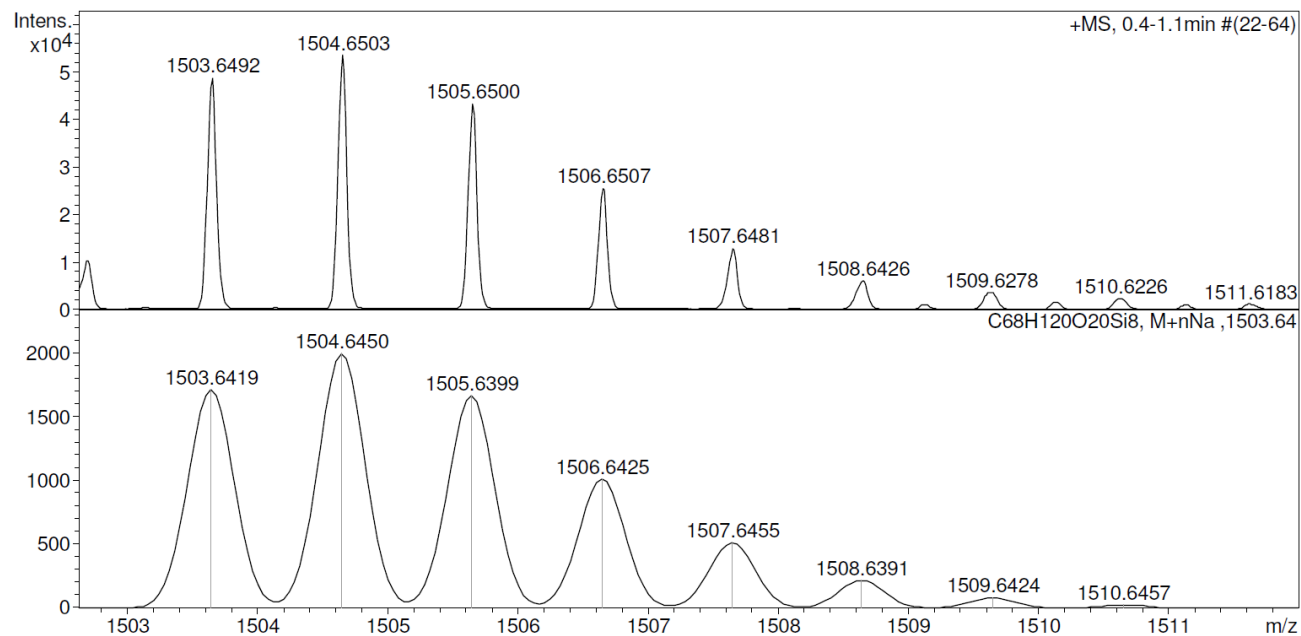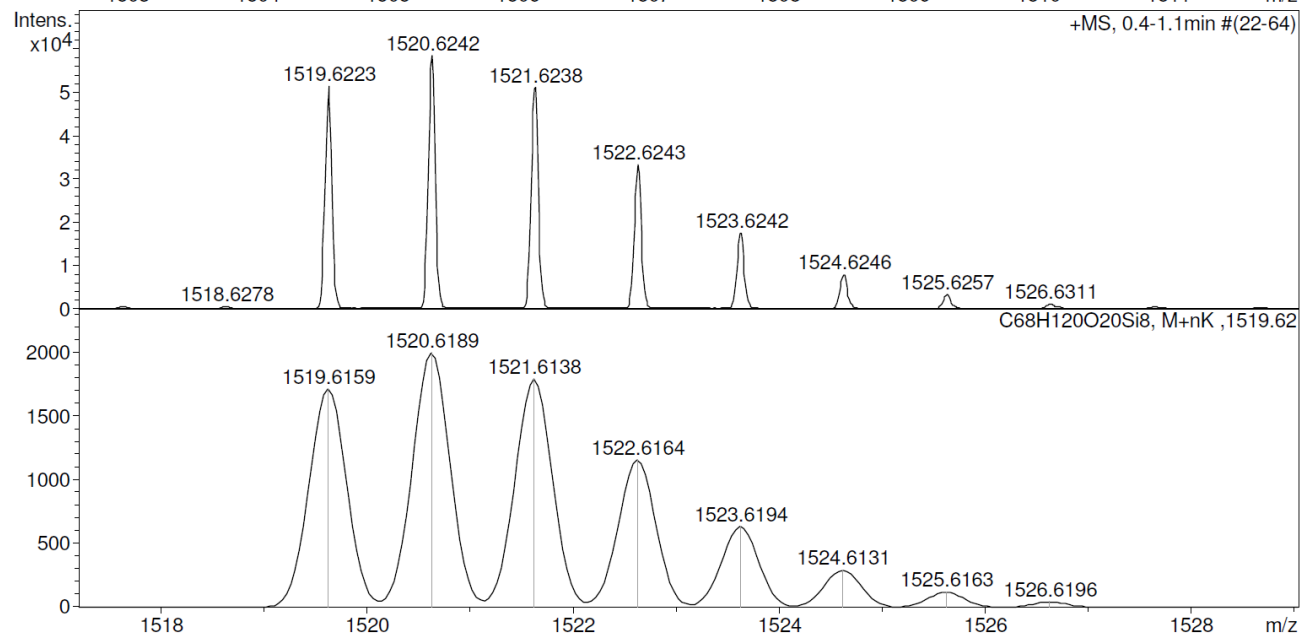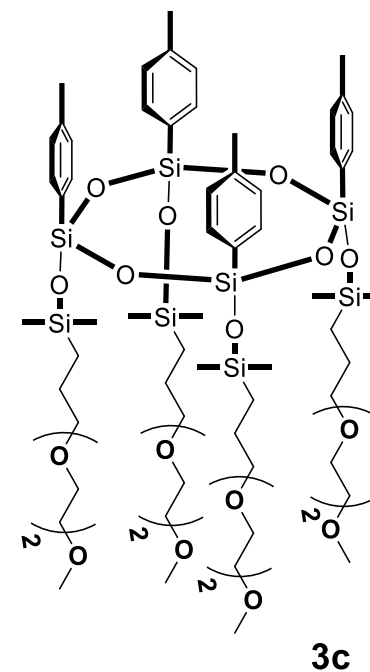

$^1\text{H}$  NMR  
(400 MHz,  $\text{CDCl}_3$ )

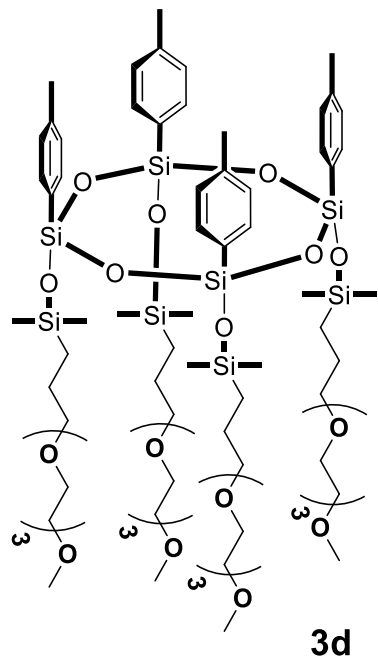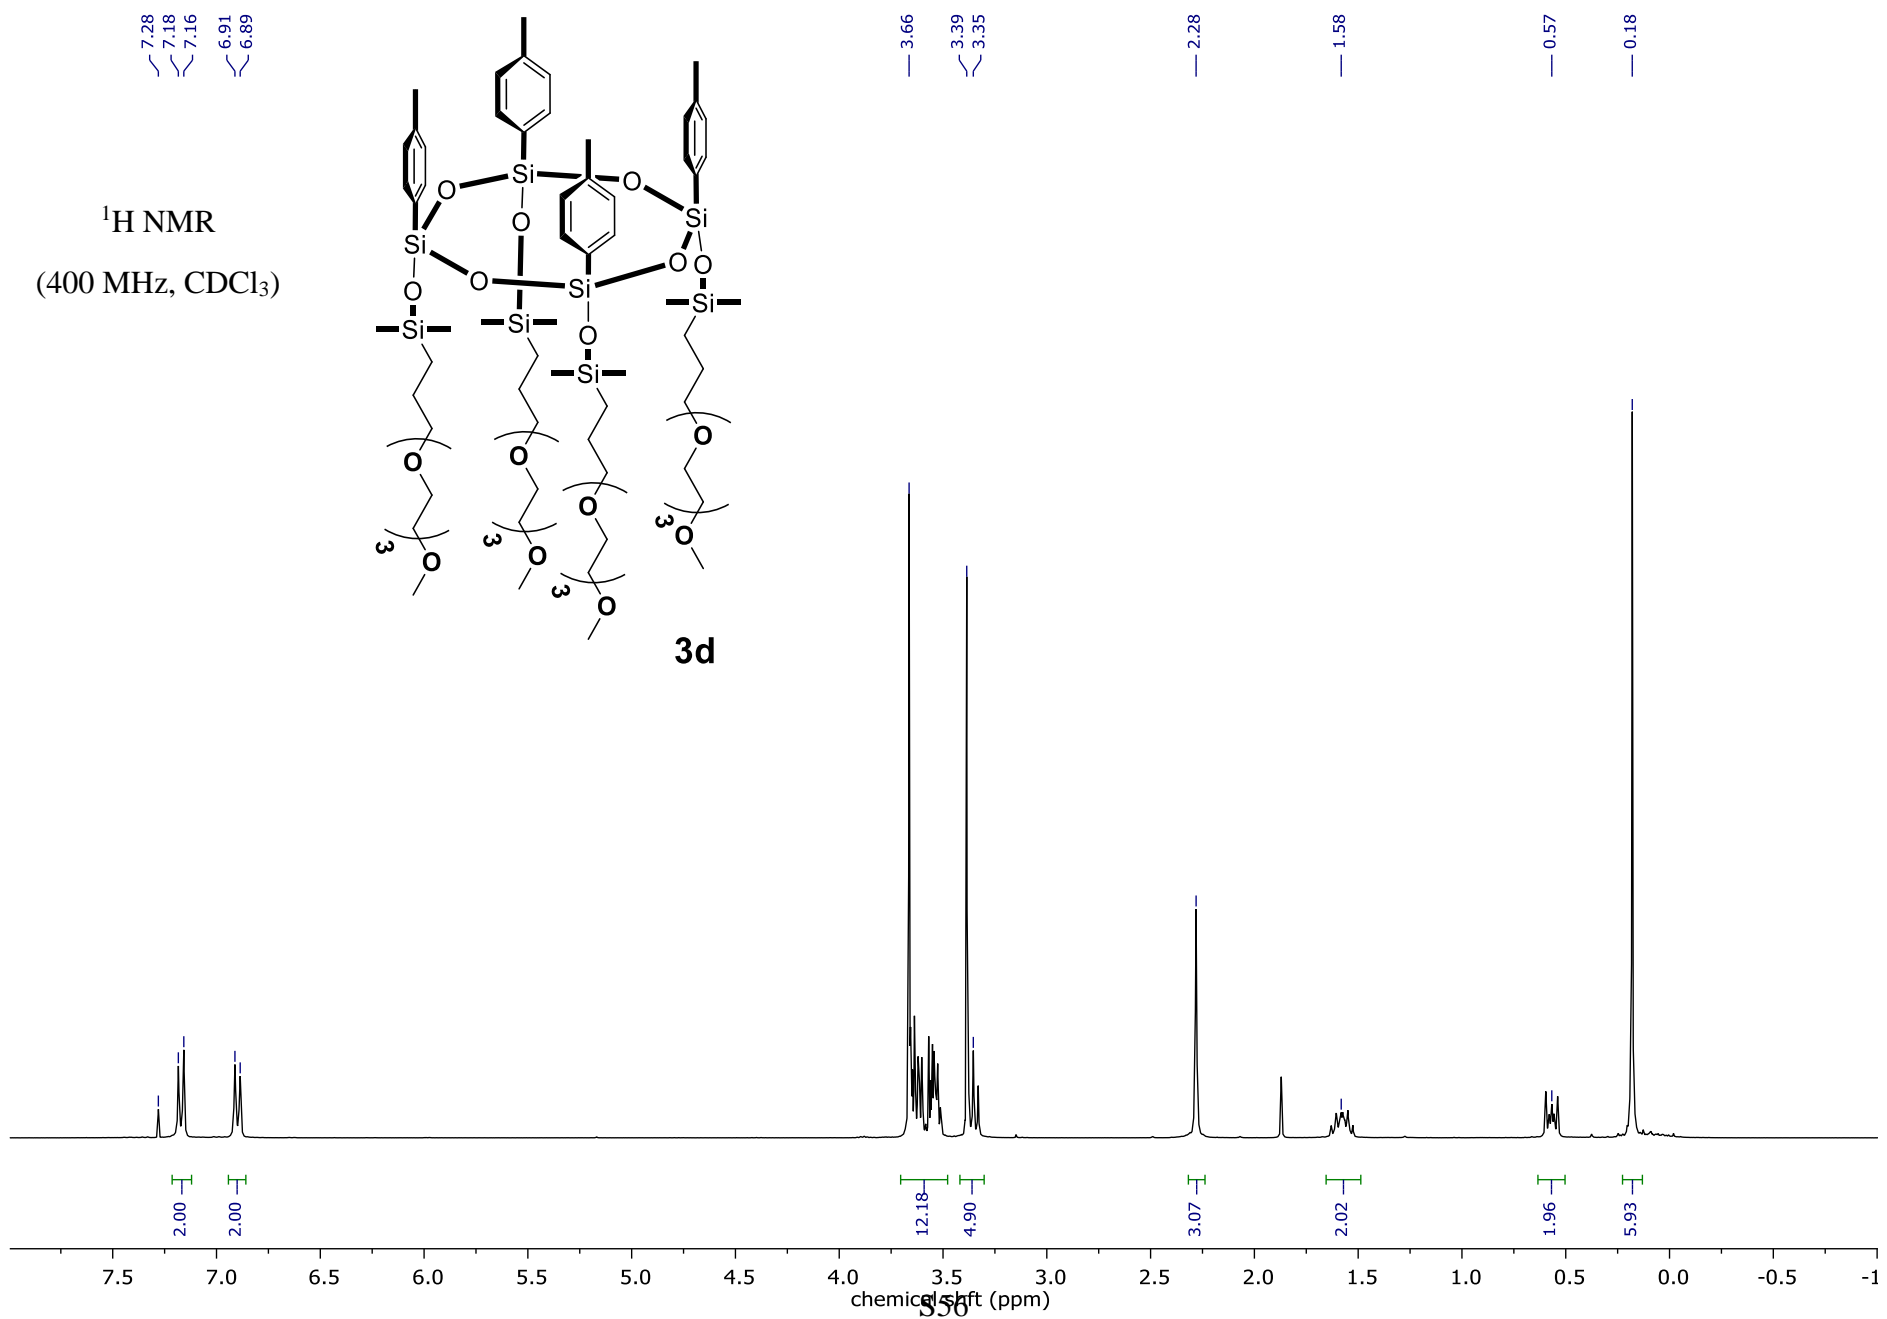



$^{13}\text{C}$  NMR  
(100 MHz,  $\text{CDCl}_3$ )

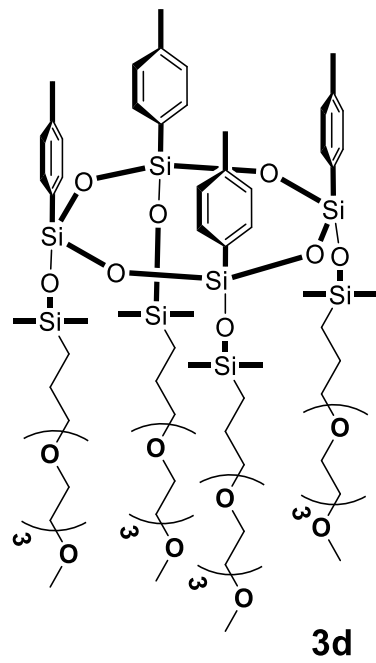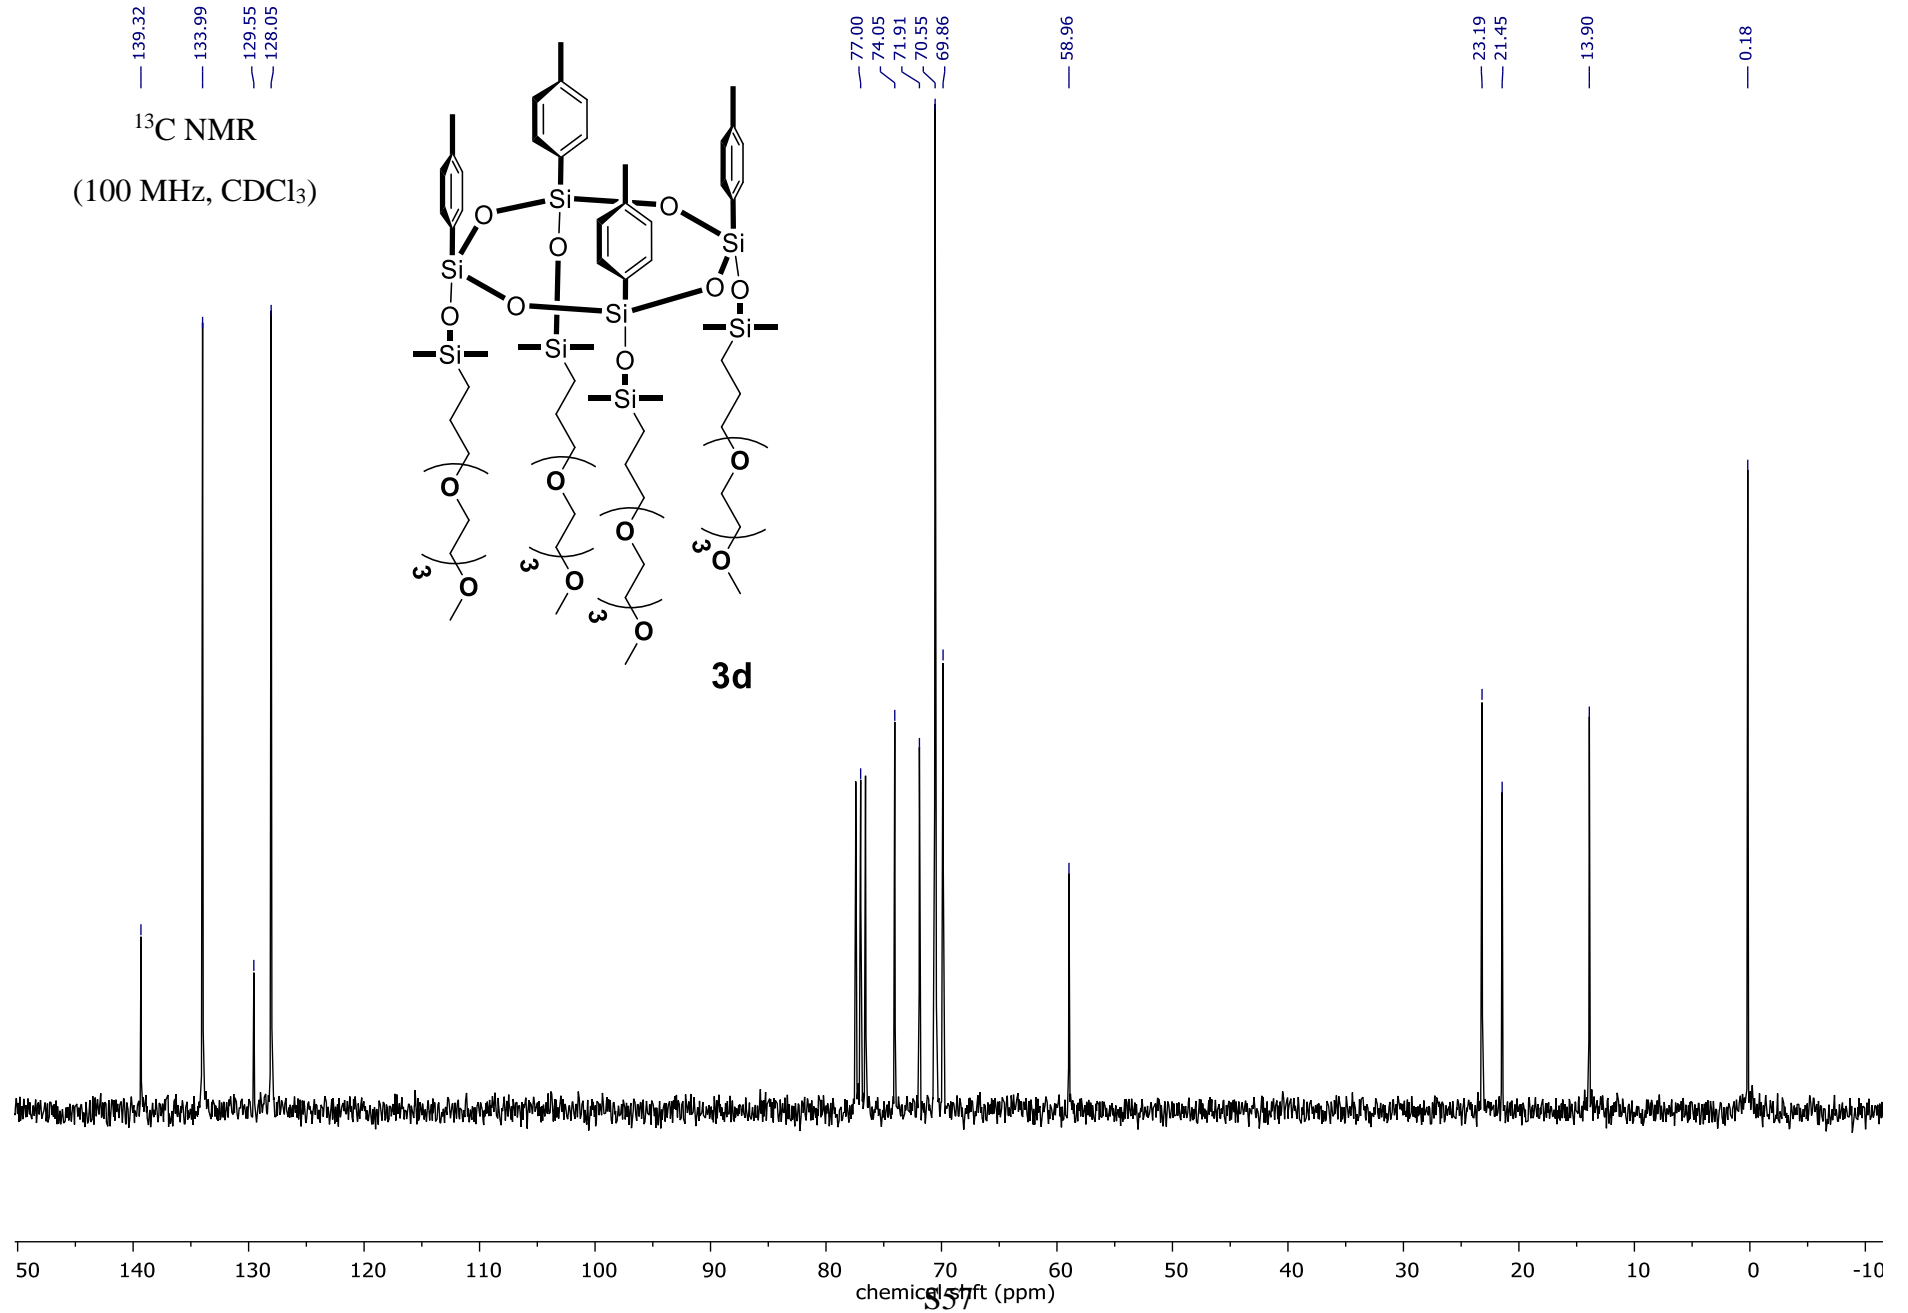

$^{29}\text{Si}$  NMR  
(80 MHz,  $\text{CDCl}_3$ )

— 10.58

— -79.08

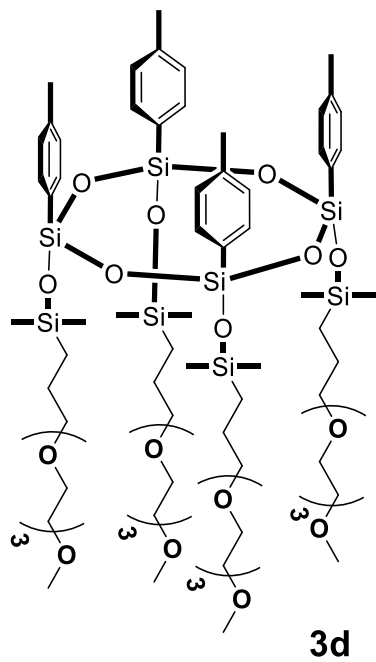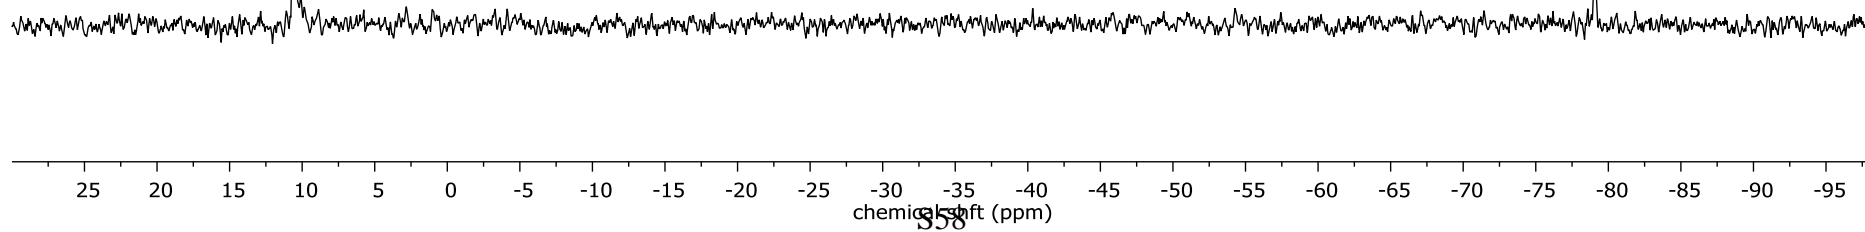

$^1\text{H}$ ,  $^{13}\text{C}$  edited-HSQC NMR,

( $^1\text{H}$ : 400 MHz,  $^{13}\text{C}$ : 100 MHz,

$\text{CDCl}_3$ )

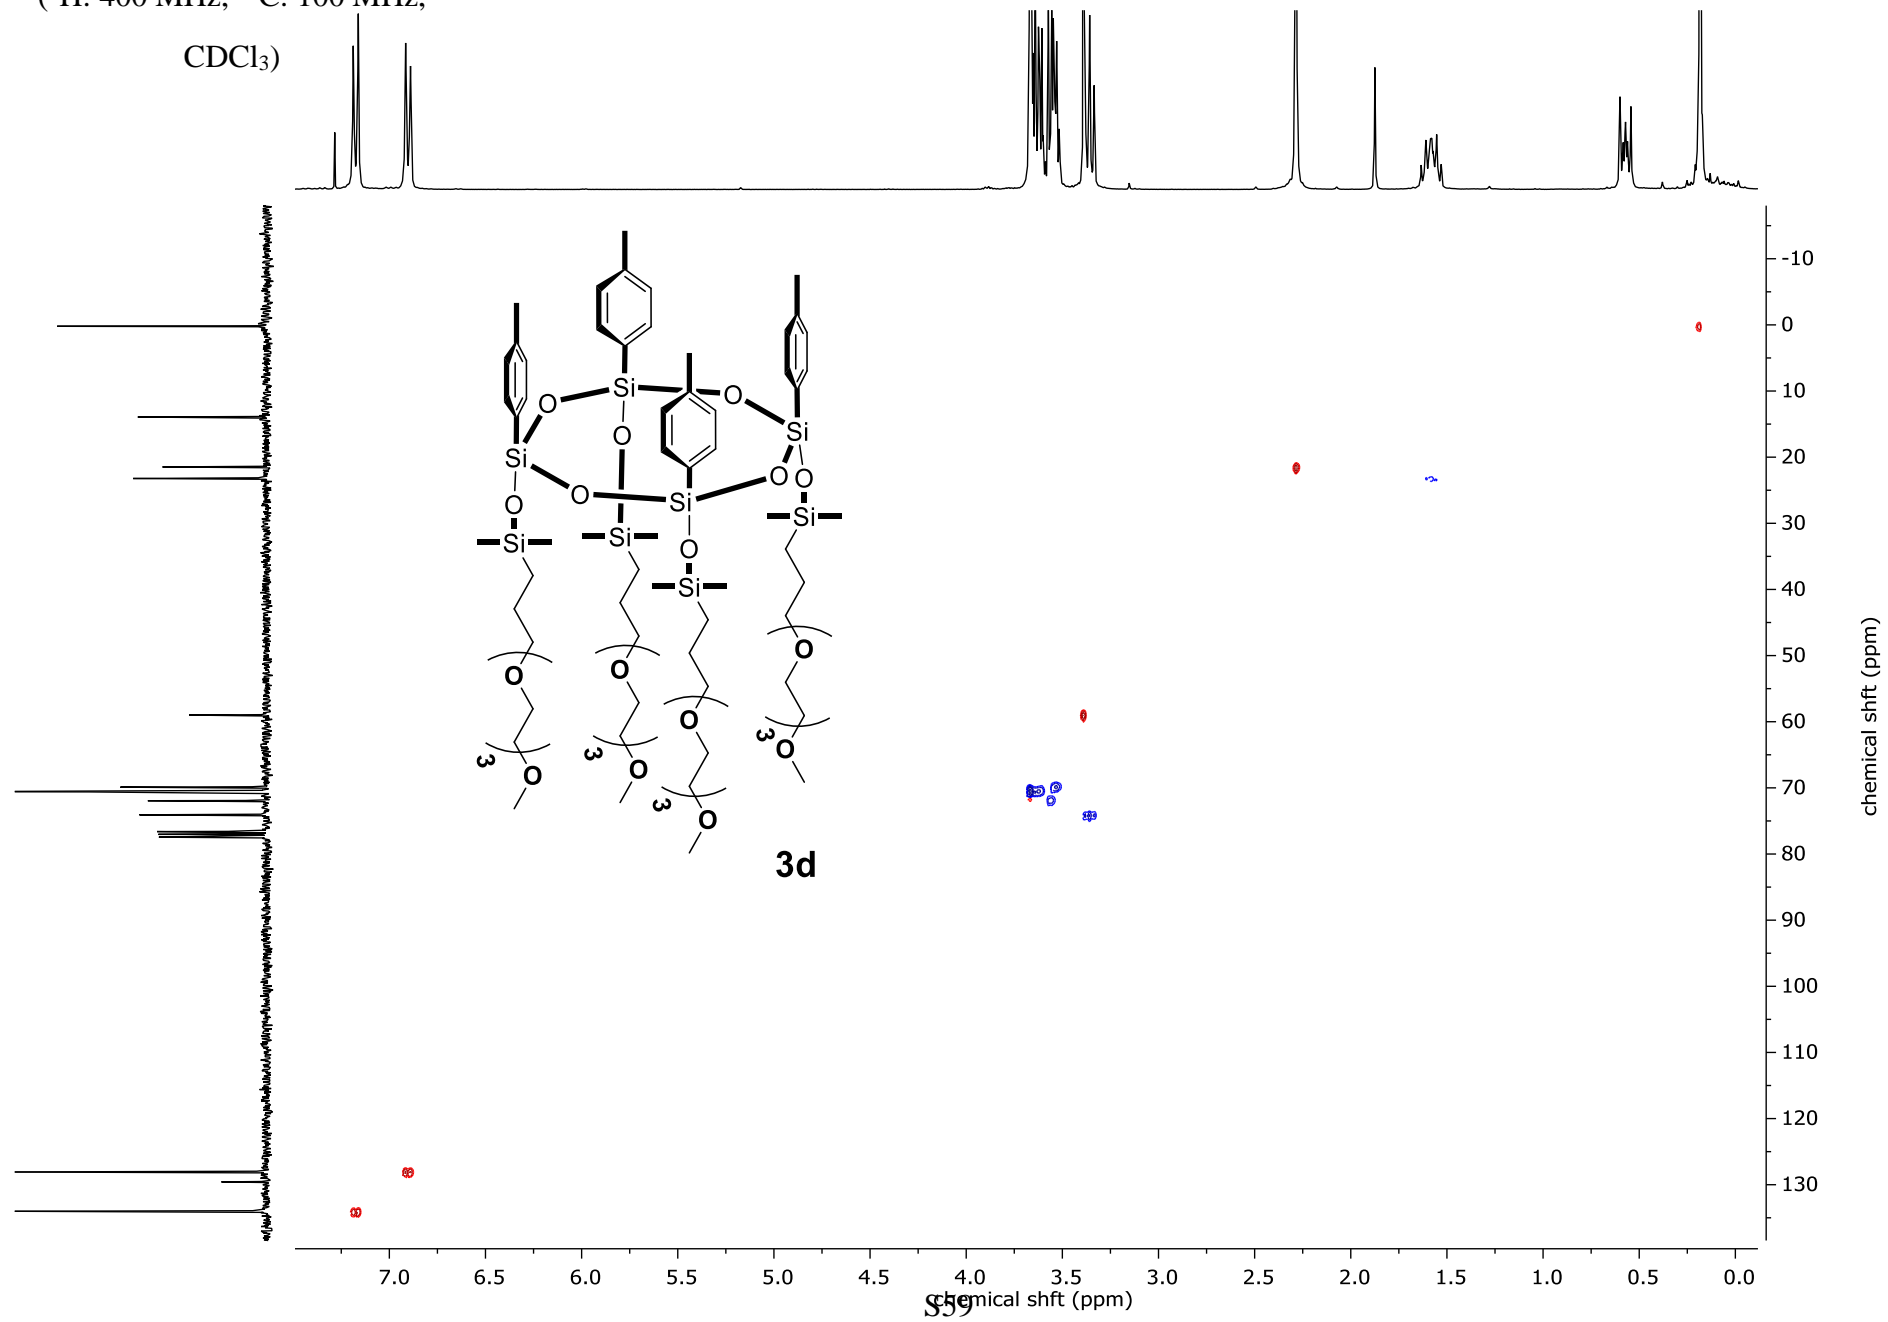

$^1\text{H}, ^{13}\text{C}$ -HMBC NMR,  
( $^1\text{H}$ : 400 MHz,  $^{13}\text{C}$ : 100 MHz,  
 $\text{CDCl}_3$ )

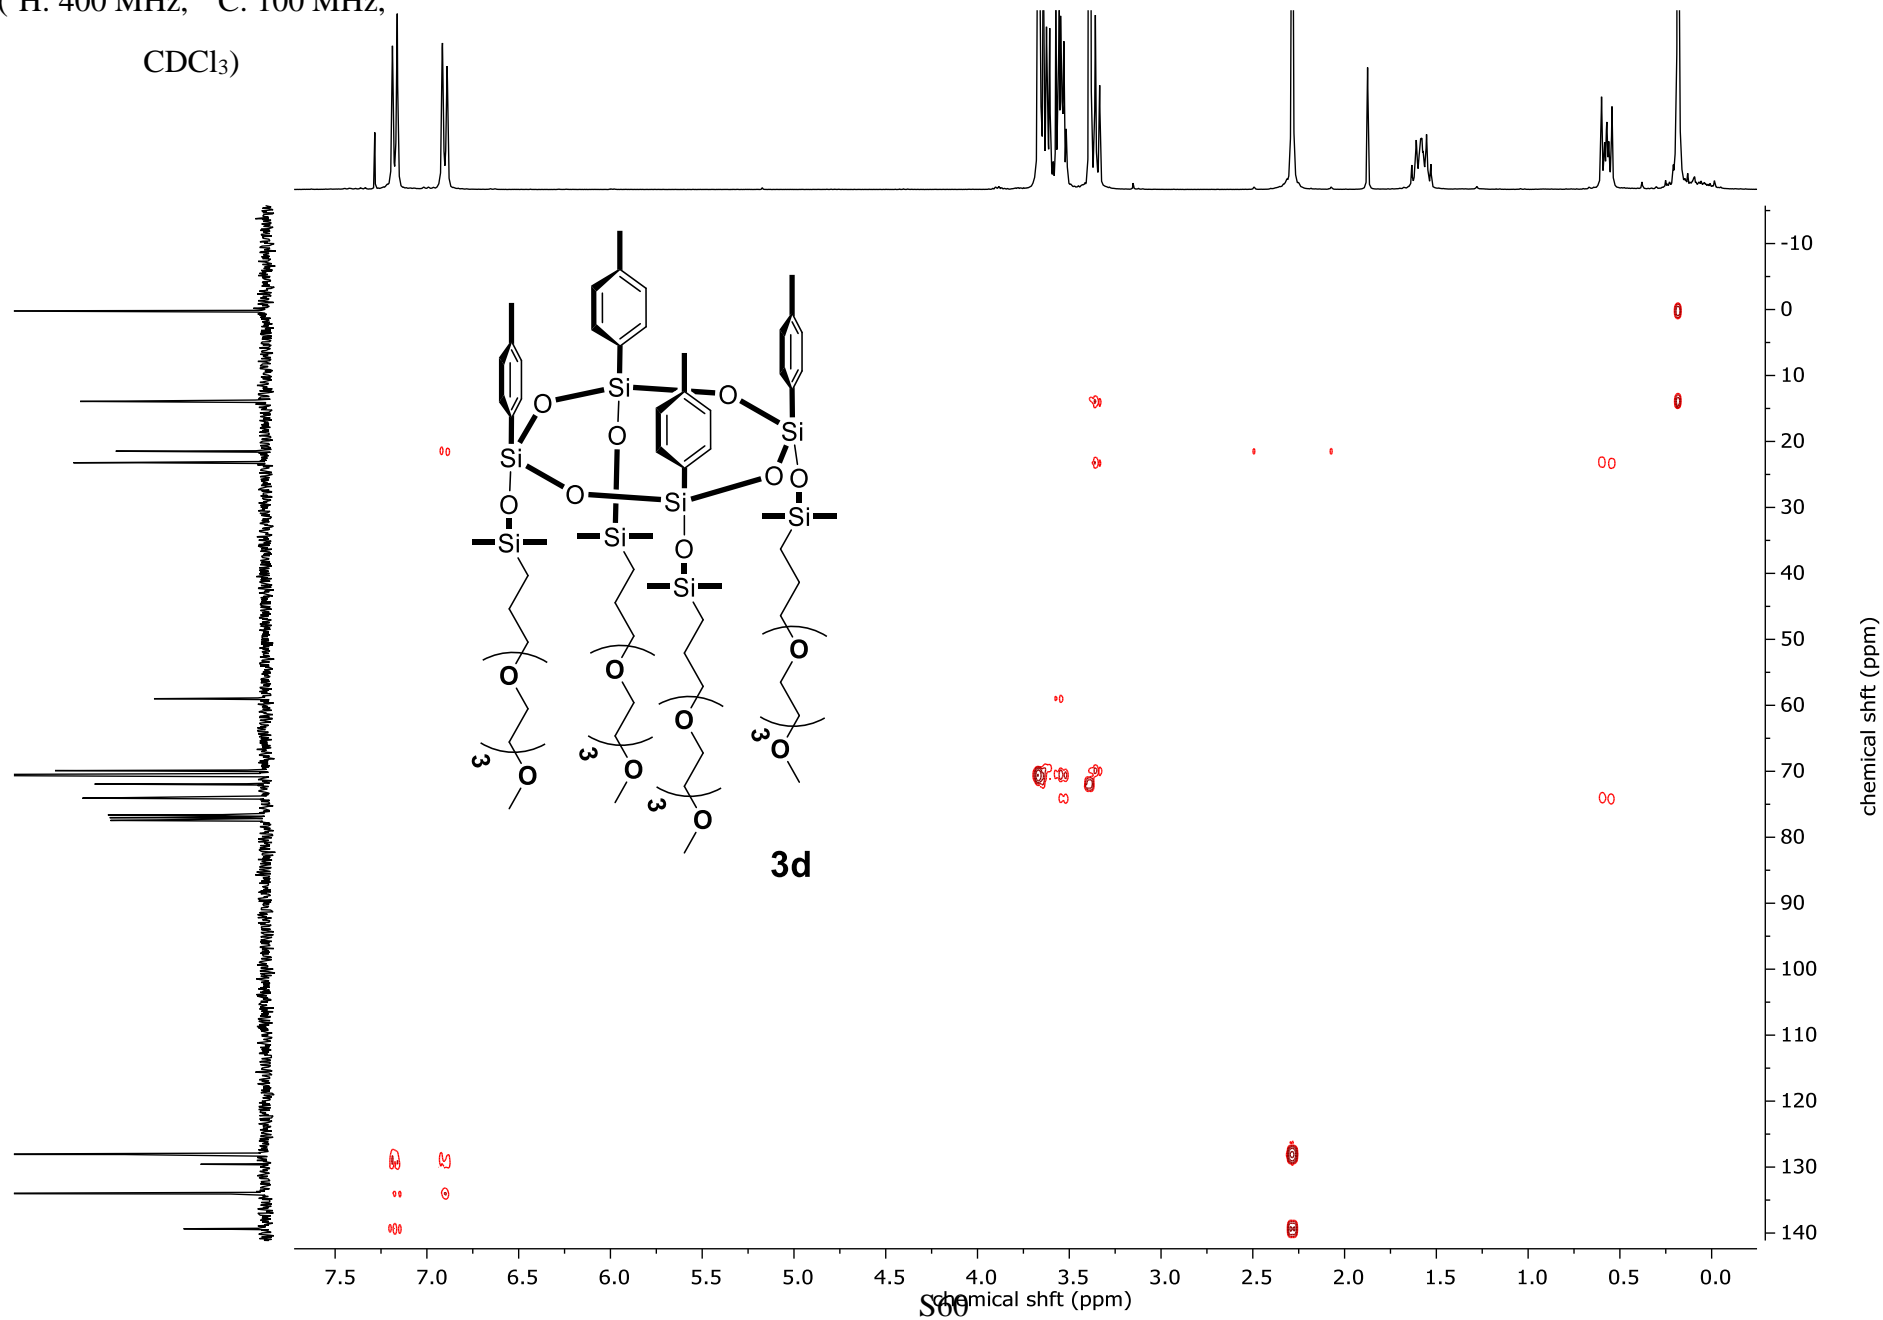

$^1\text{H}, ^{29}\text{Si}$ -HMBC NMR,  
( $^1\text{H}$ : 400 MHz,  $^{29}\text{Si}$ : 80 MHz,  
 $\text{CDCl}_3$ )

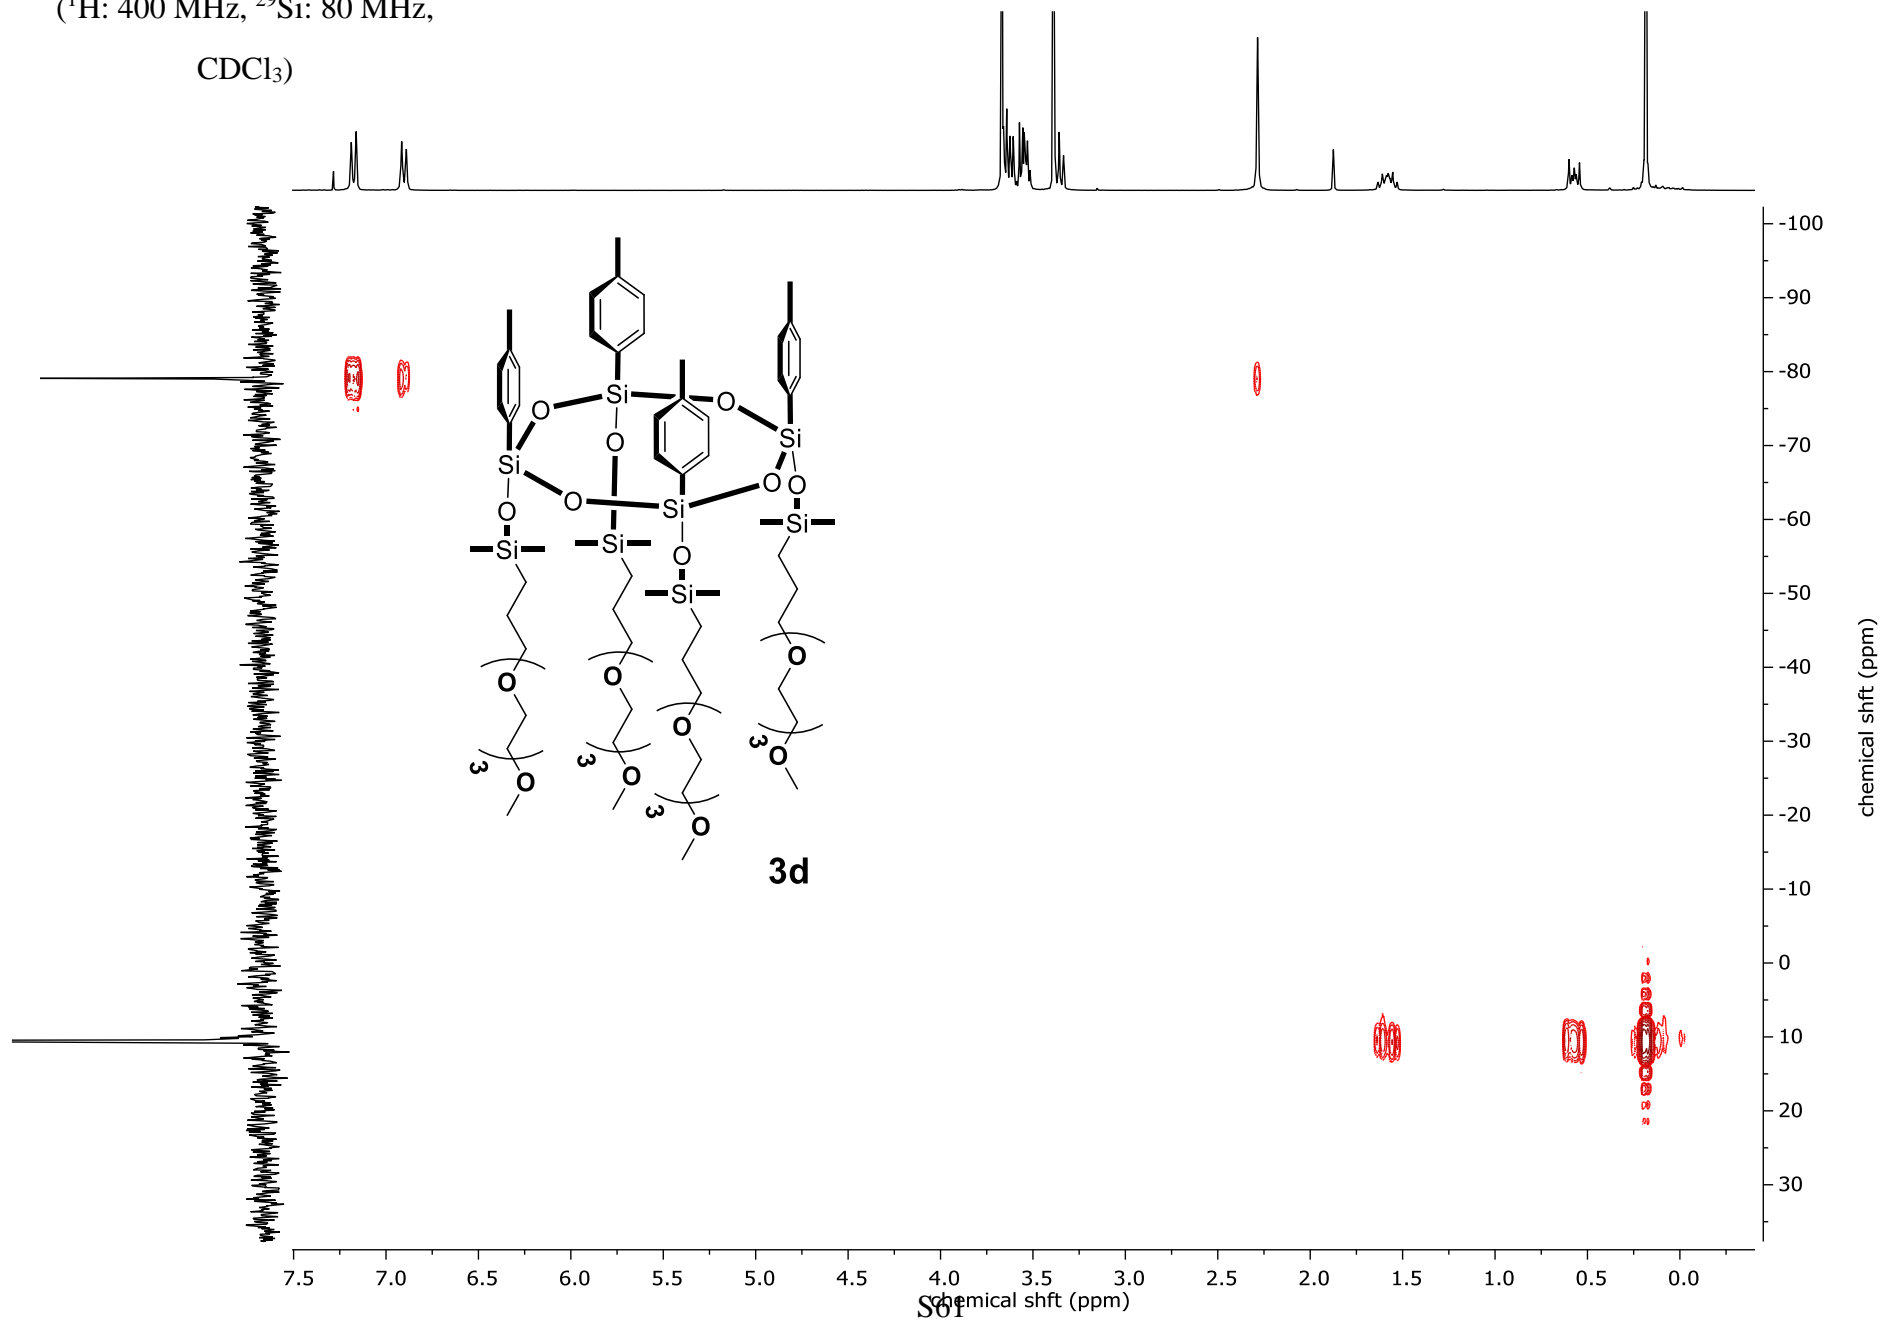

$^1\text{H}, ^{13}\text{C}$ -HSQMBC NMR,  
( $^1\text{H}$ : 400 MHz,  $^{13}\text{C}$ : 100 MHz,  
 $\text{CDCl}_3$ )

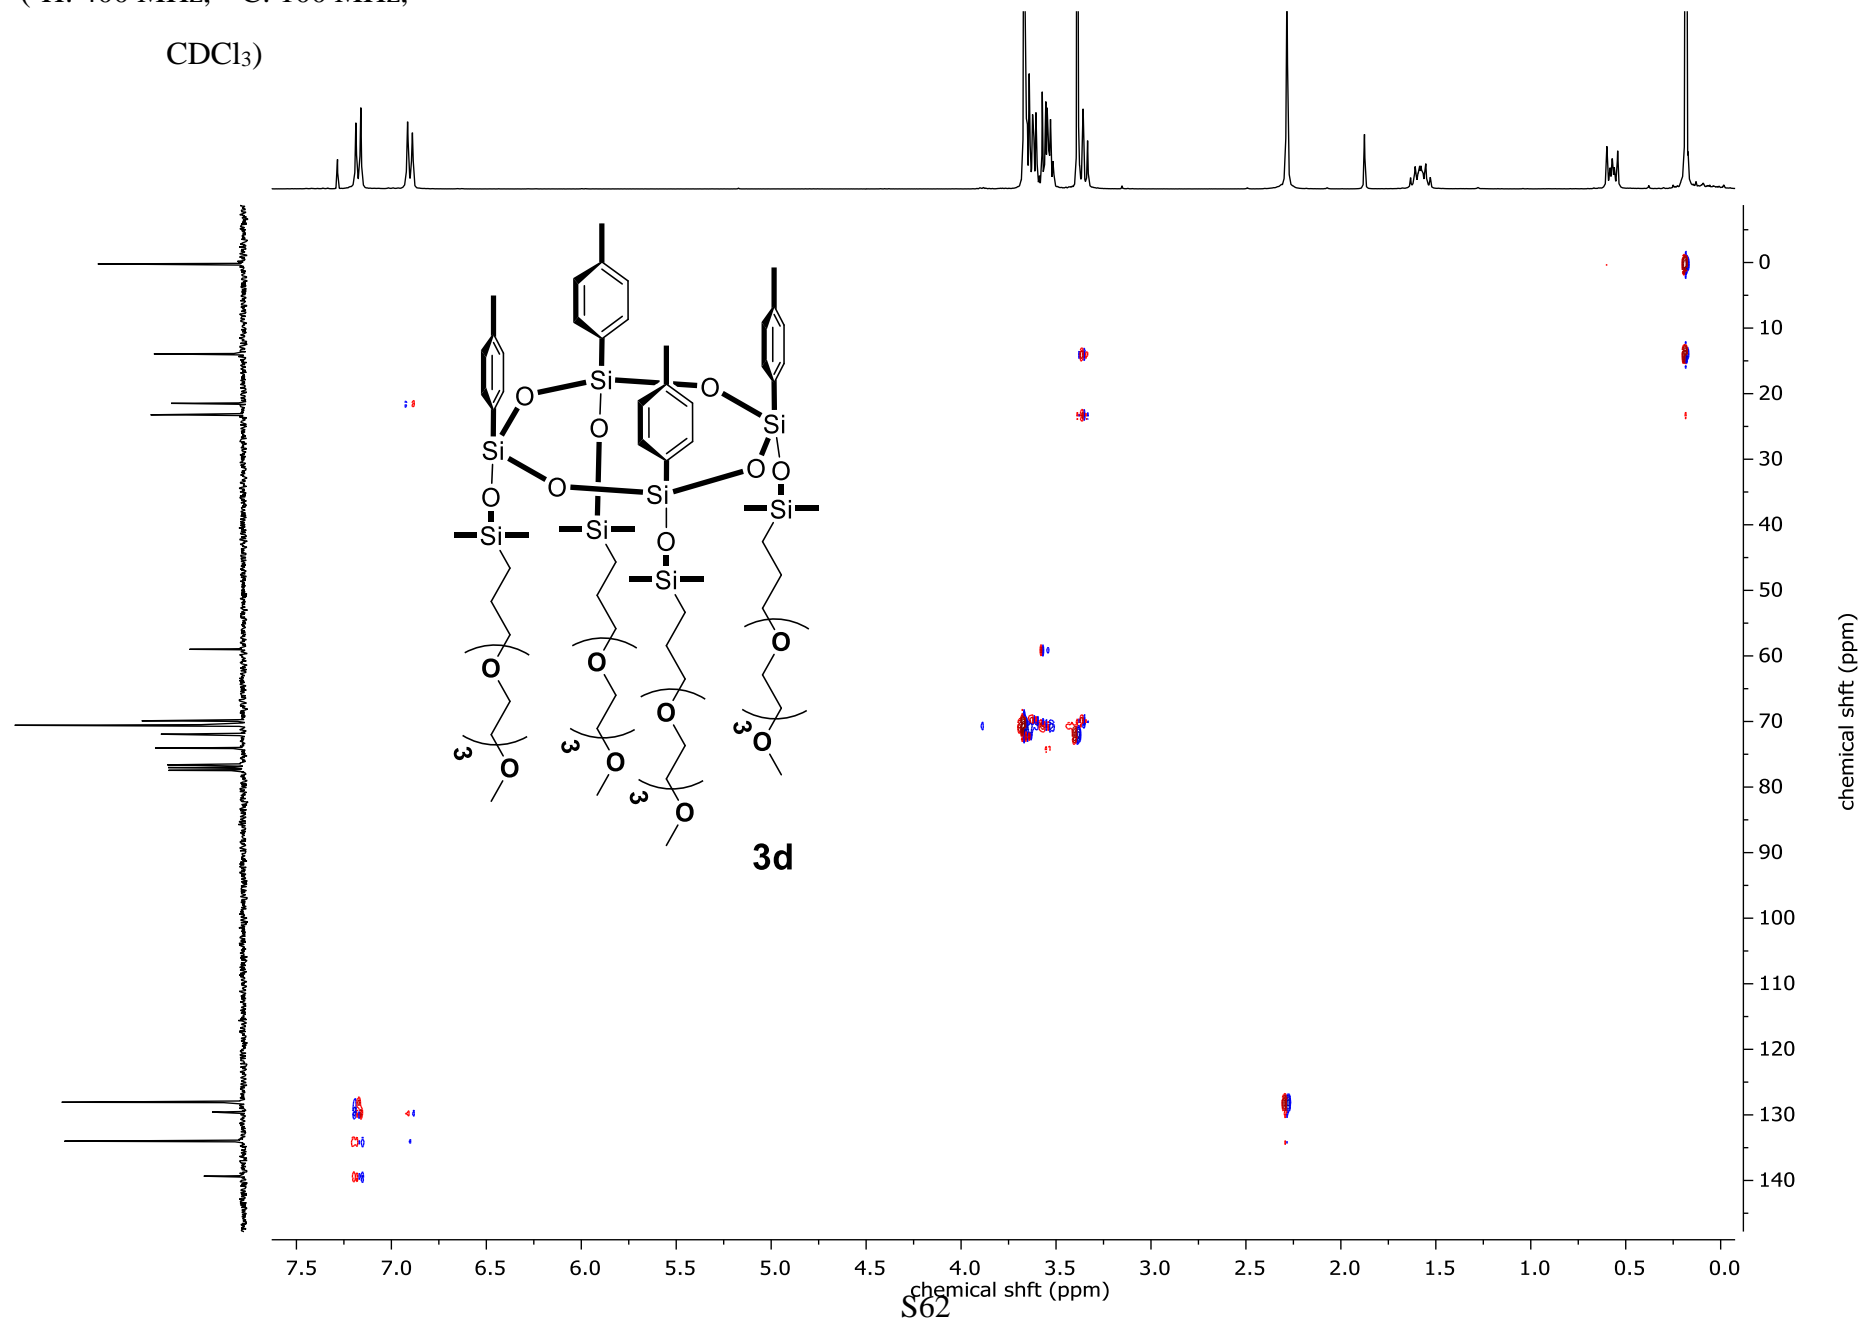

$^1\text{H}, ^{29}\text{Si}$ -HSQMBC NMR,

( $^1\text{H}$ : 400 MHz,  $^{29}\text{Si}$ : 80 MHz,

$\text{CDCl}_3$ )

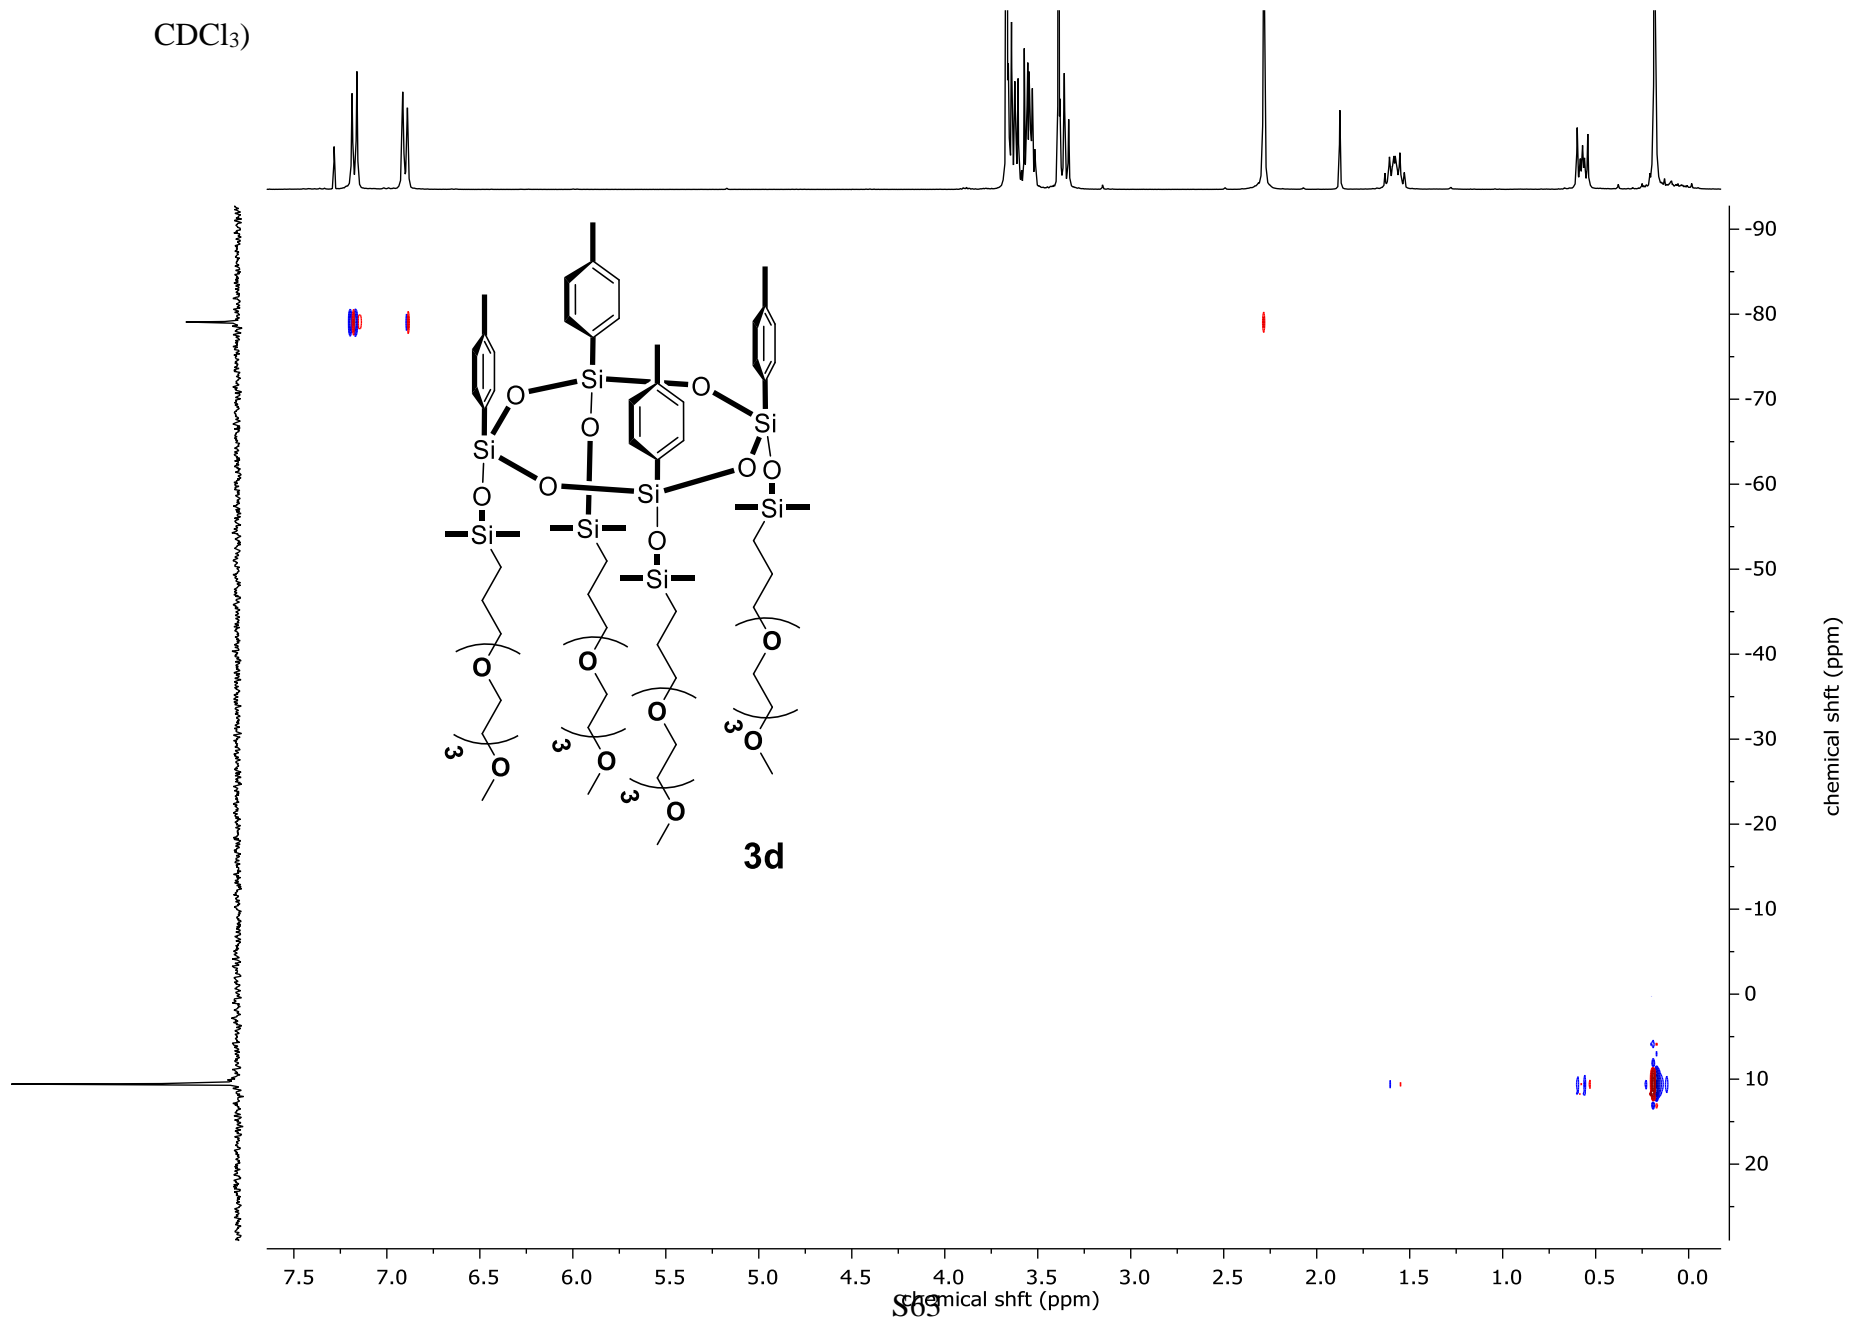

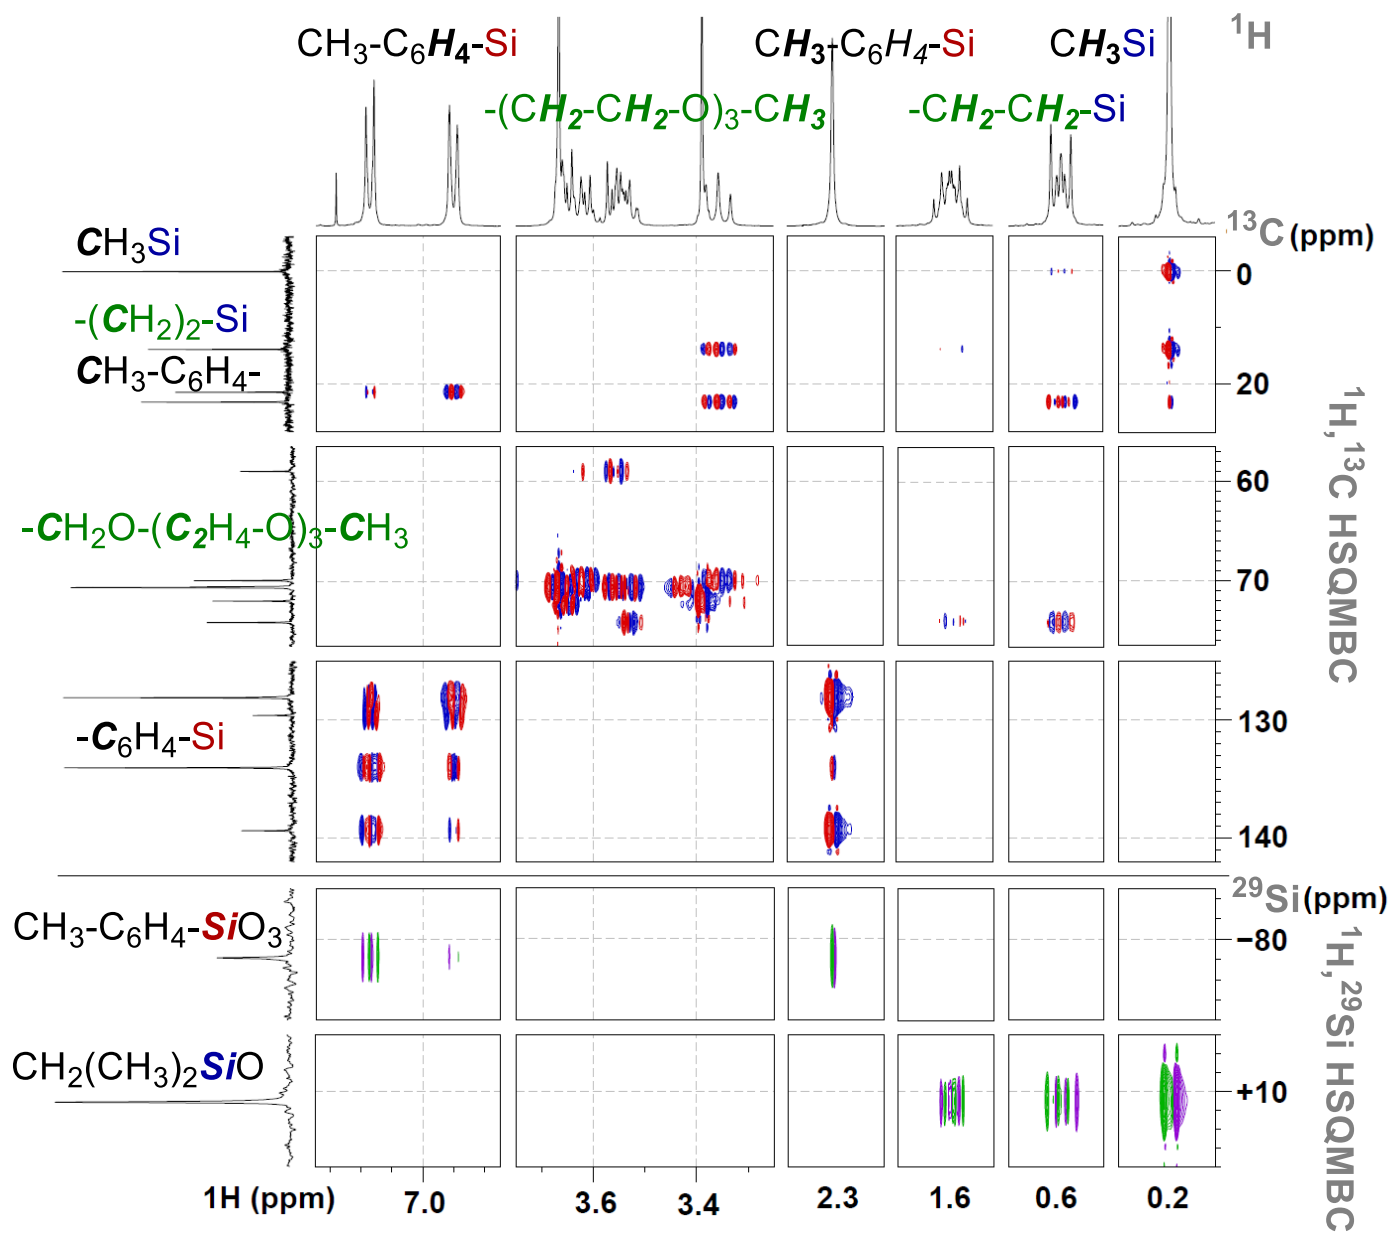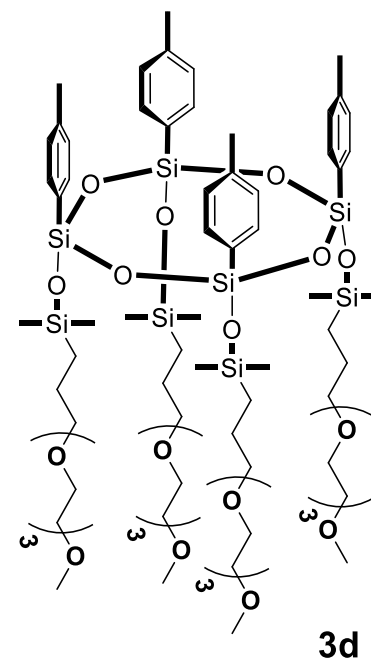



GPC

$M_n = 1686$  (pss)

$M_w = 1760$  (pss)

PDI = 1.05

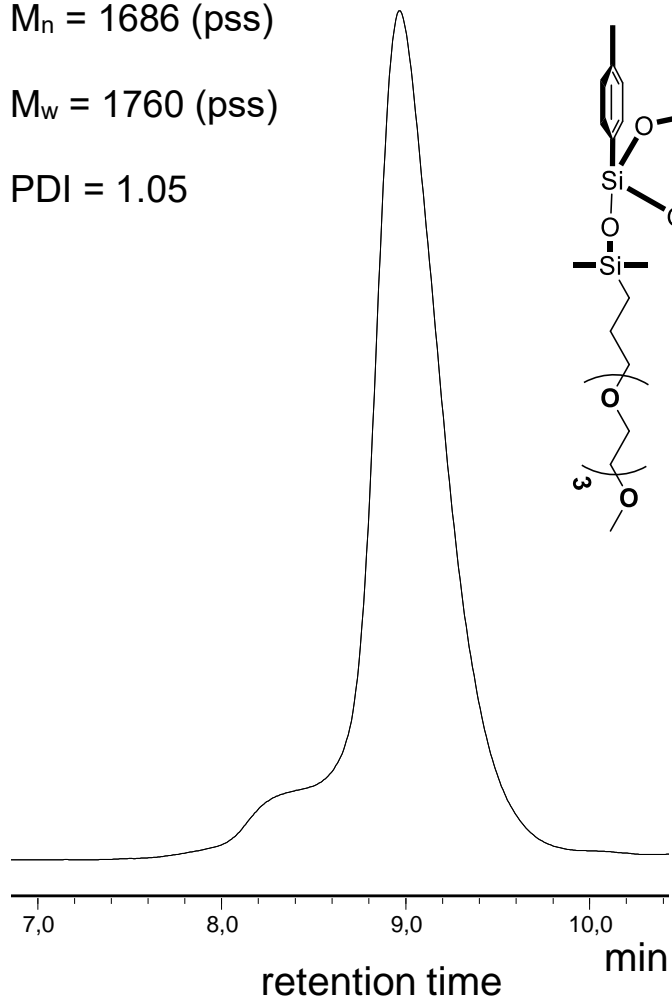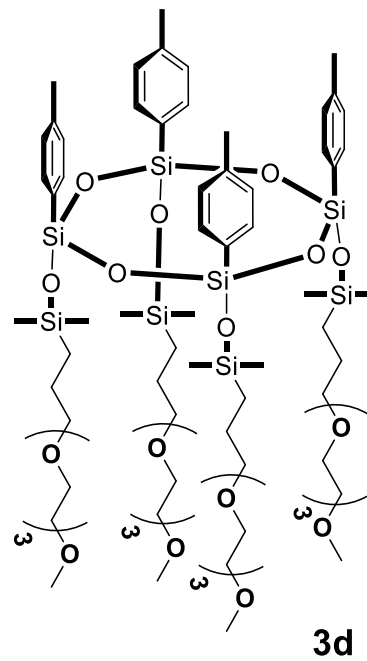

IR-spectrum

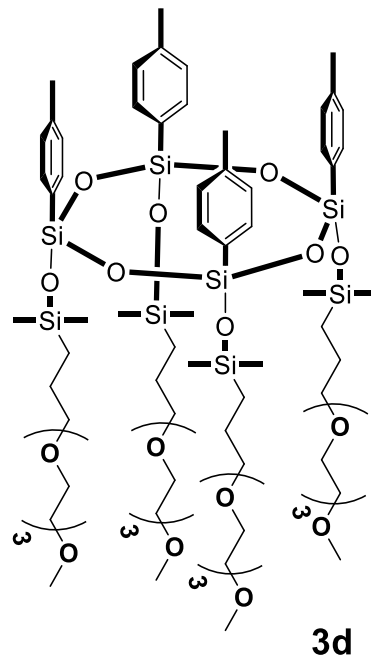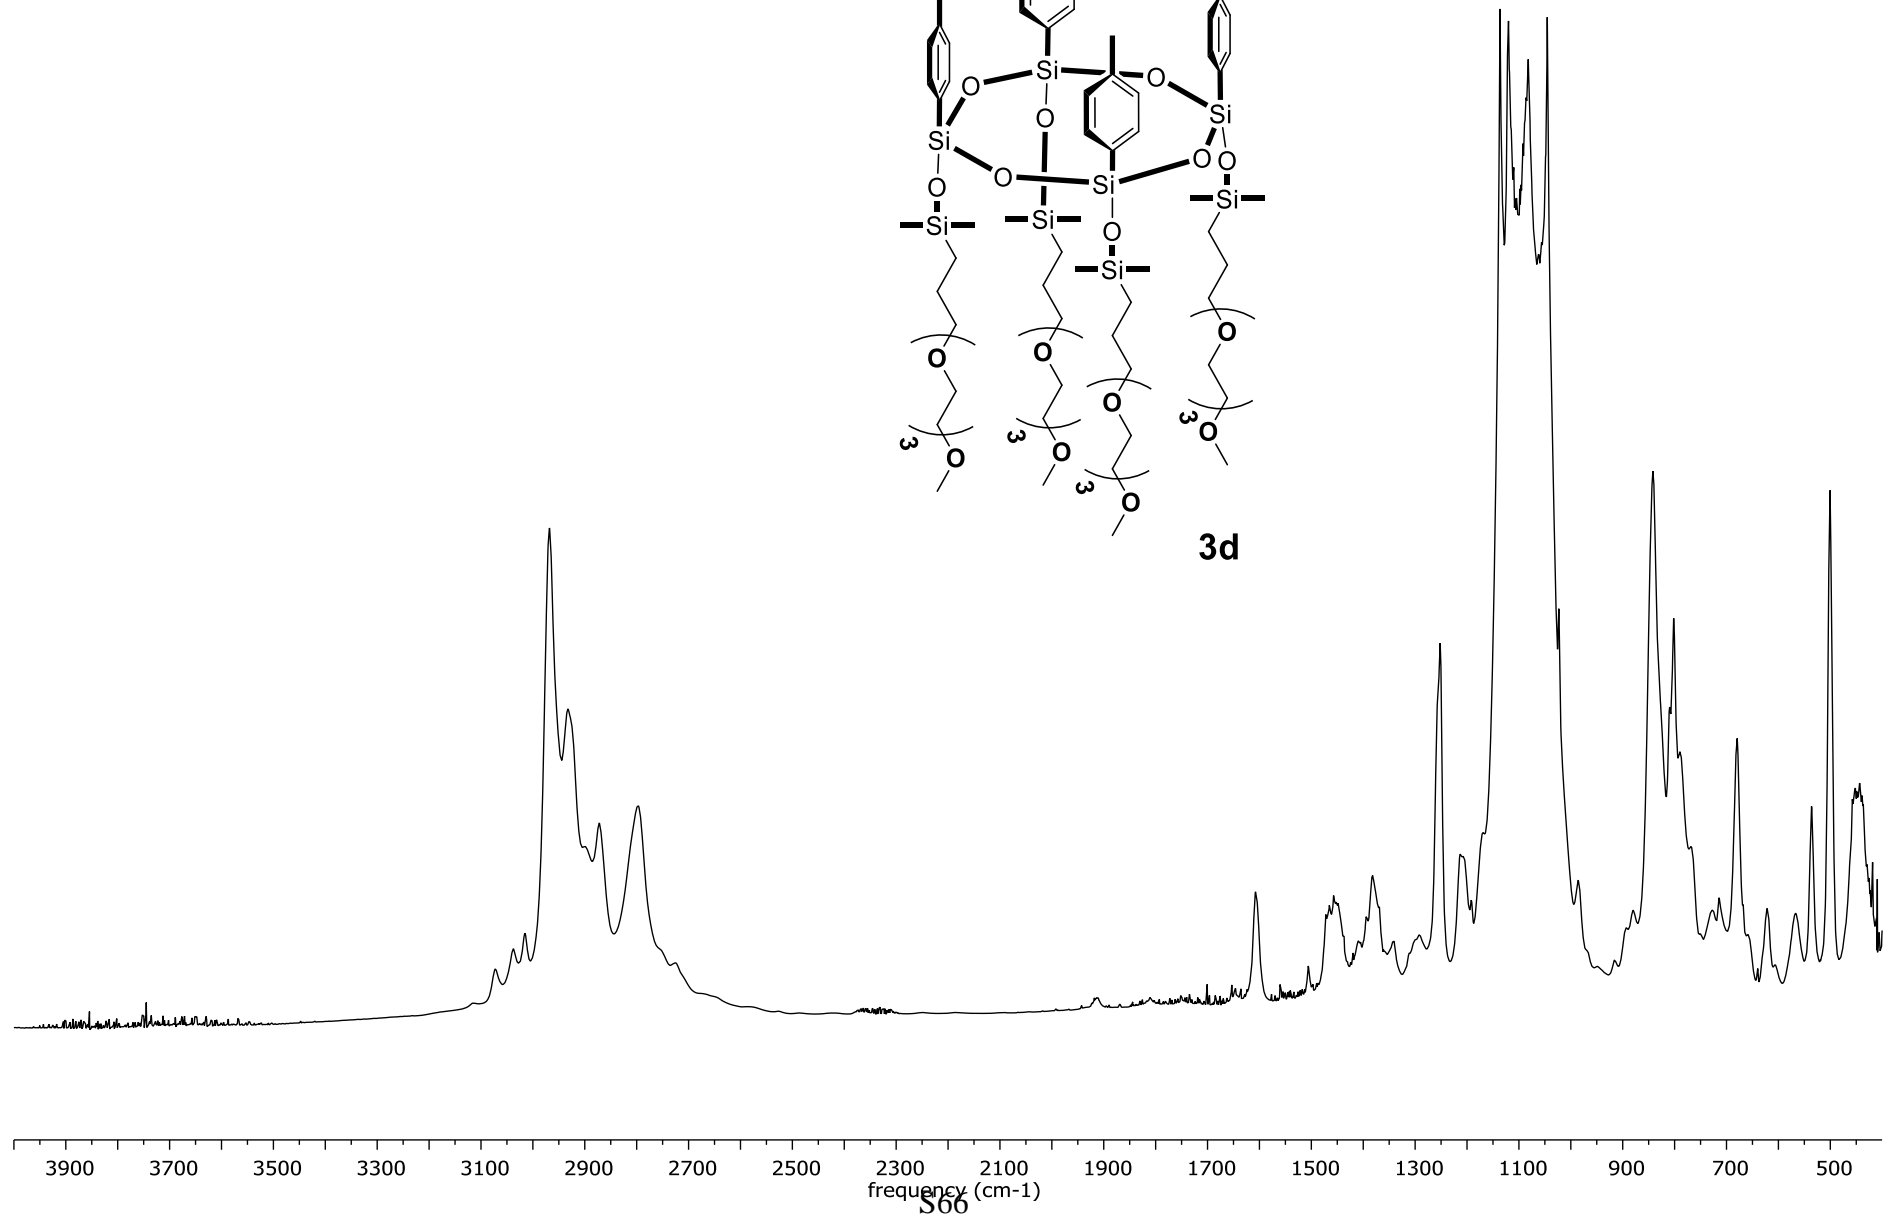

# HRMS (ESI)

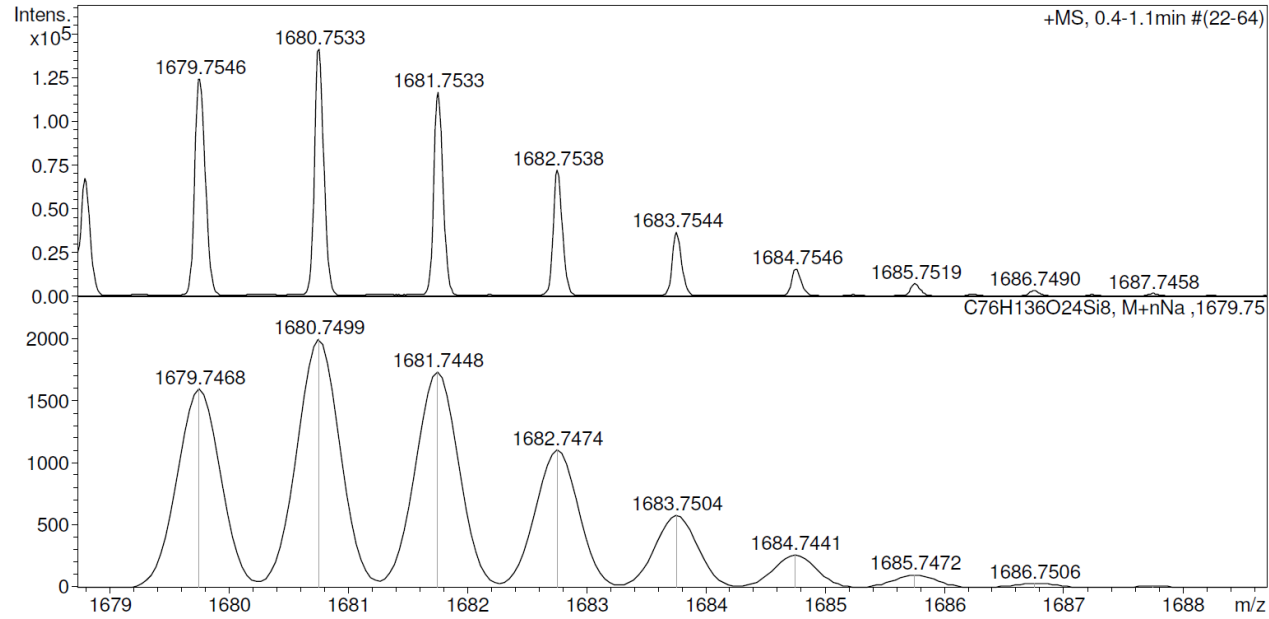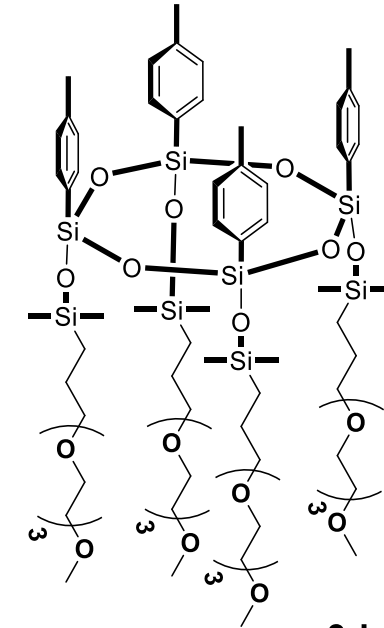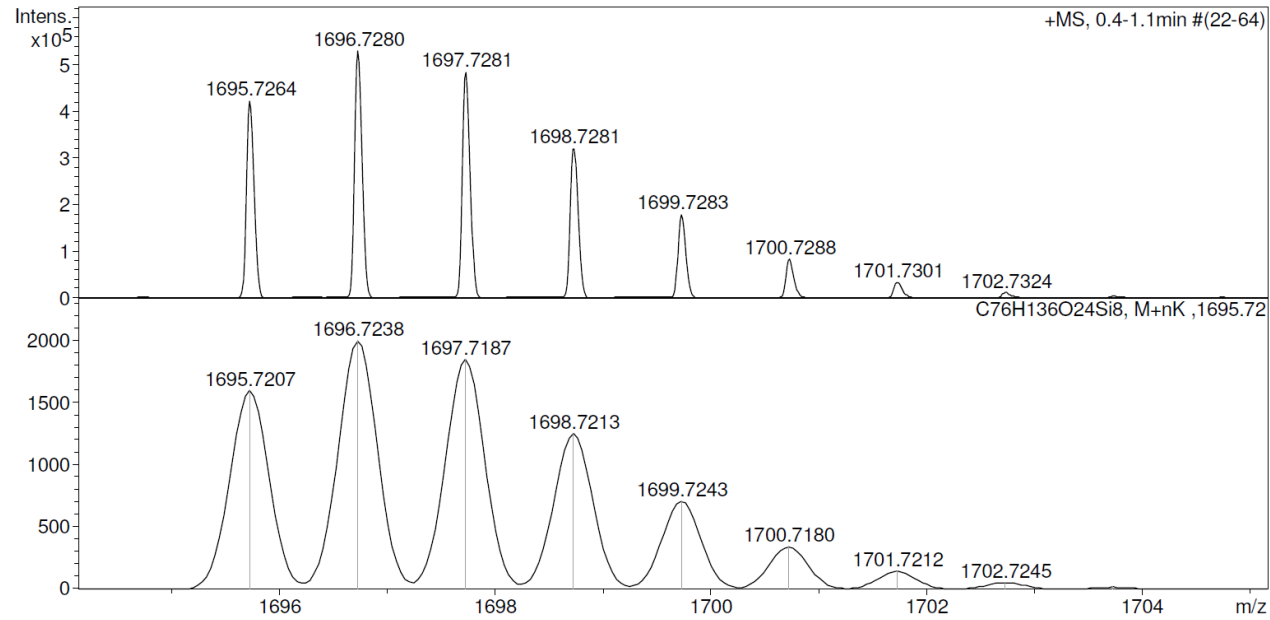

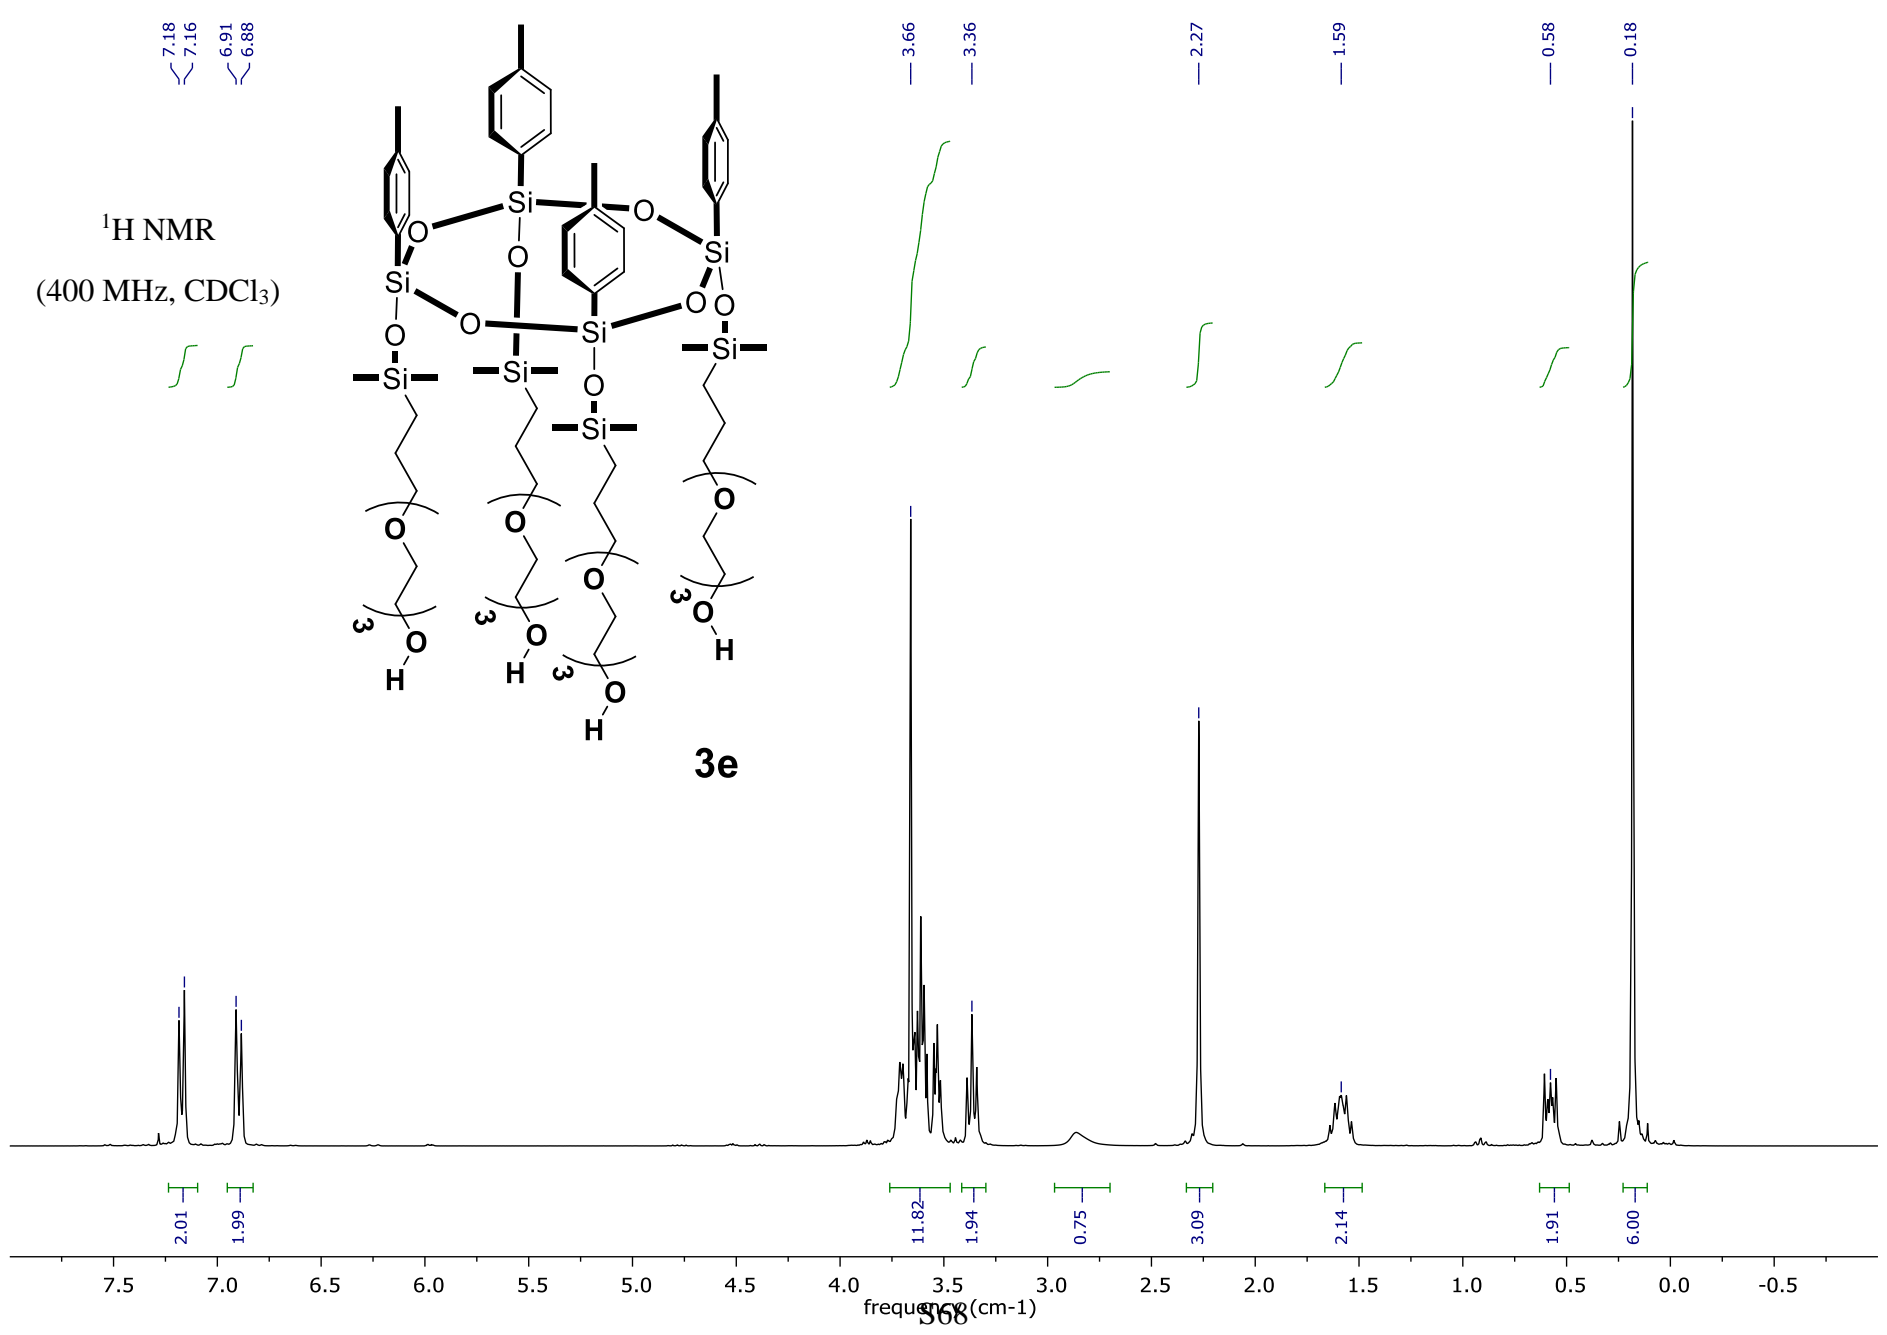

$^{13}\text{C}$  NMR  
(100 MHz,  $\text{CDCl}_3$ )

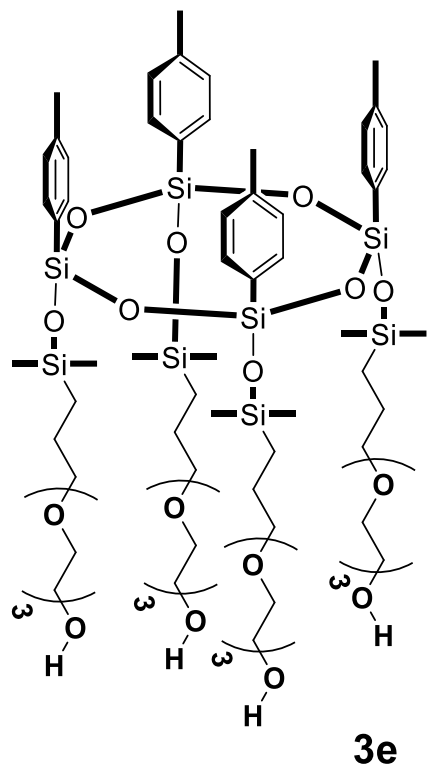

139.23  
133.88  
129.44  
127.95

77.00  
73.94  
72.41  
70.49  
70.24  
69.75

61.54

23.07  
21.36

13.80

0.10

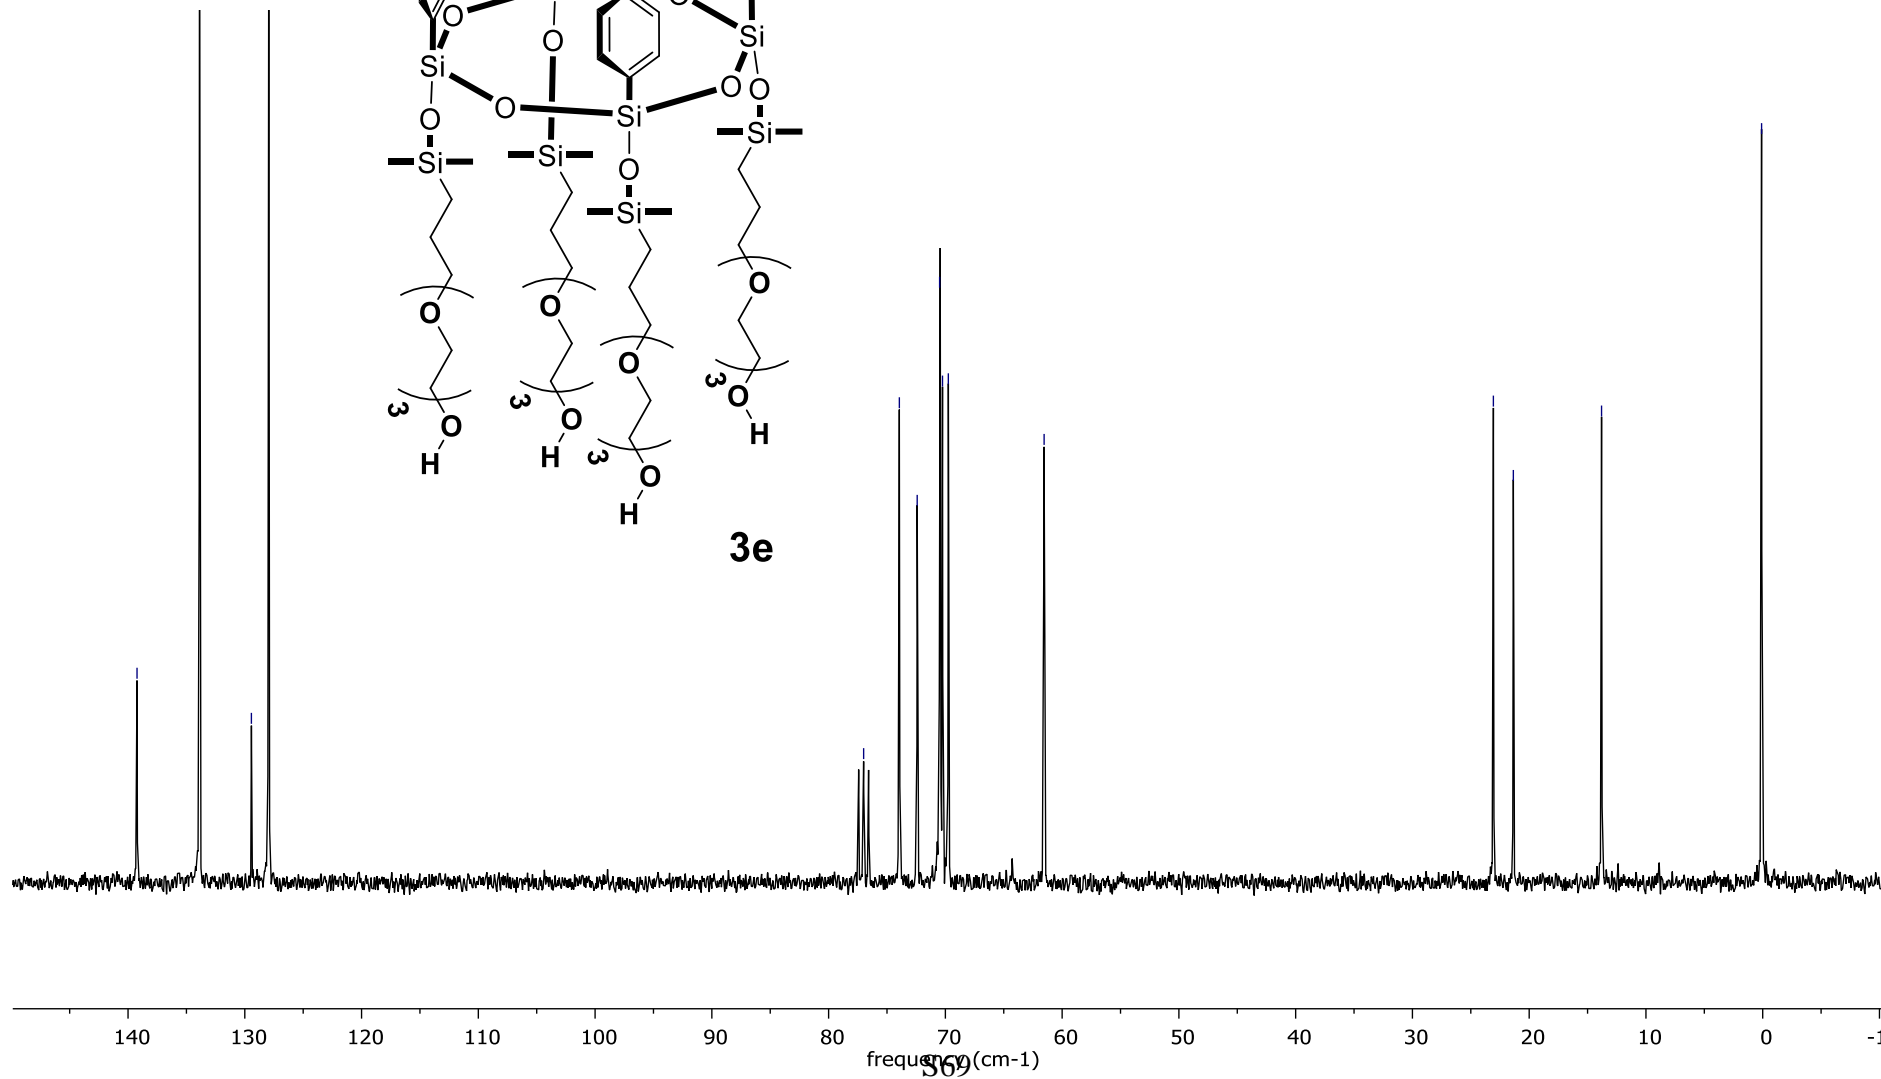

<sup>29</sup>Si NMR  
(80 MHz, CDCl<sub>3</sub>)

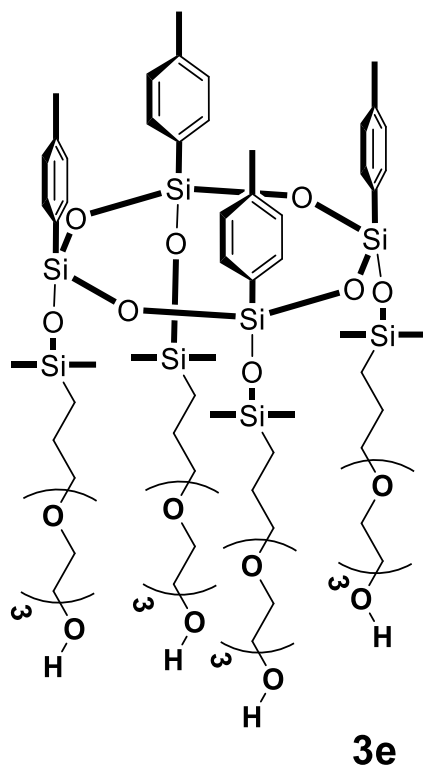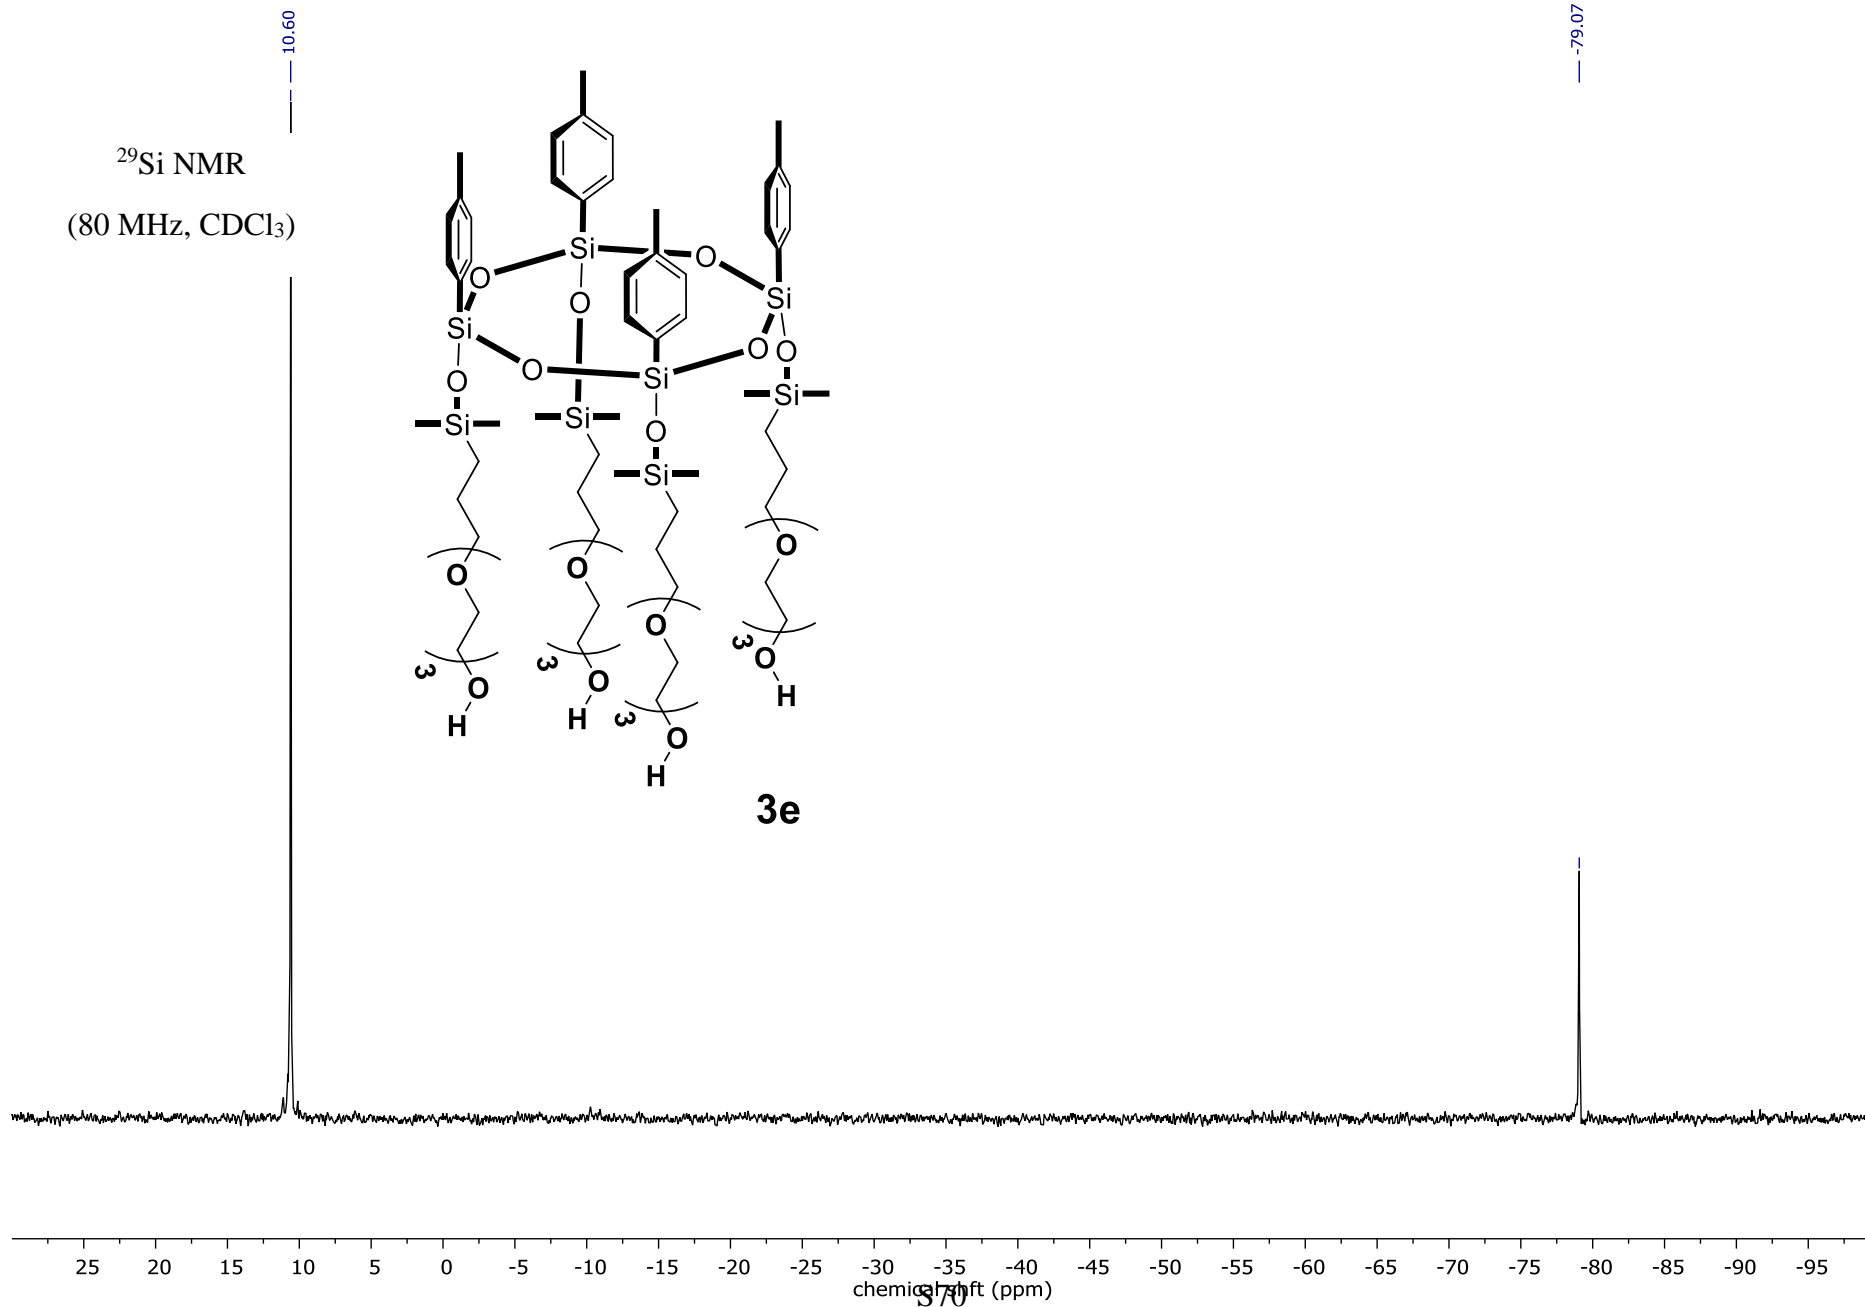

$^1\text{H}$ ,  $^{13}\text{C}$  edited-HSQC NMR,  
( $^1\text{H}$ : 400 MHz,  $^{13}\text{C}$ : 100 MHz,  
 $\text{CDCl}_3$ )

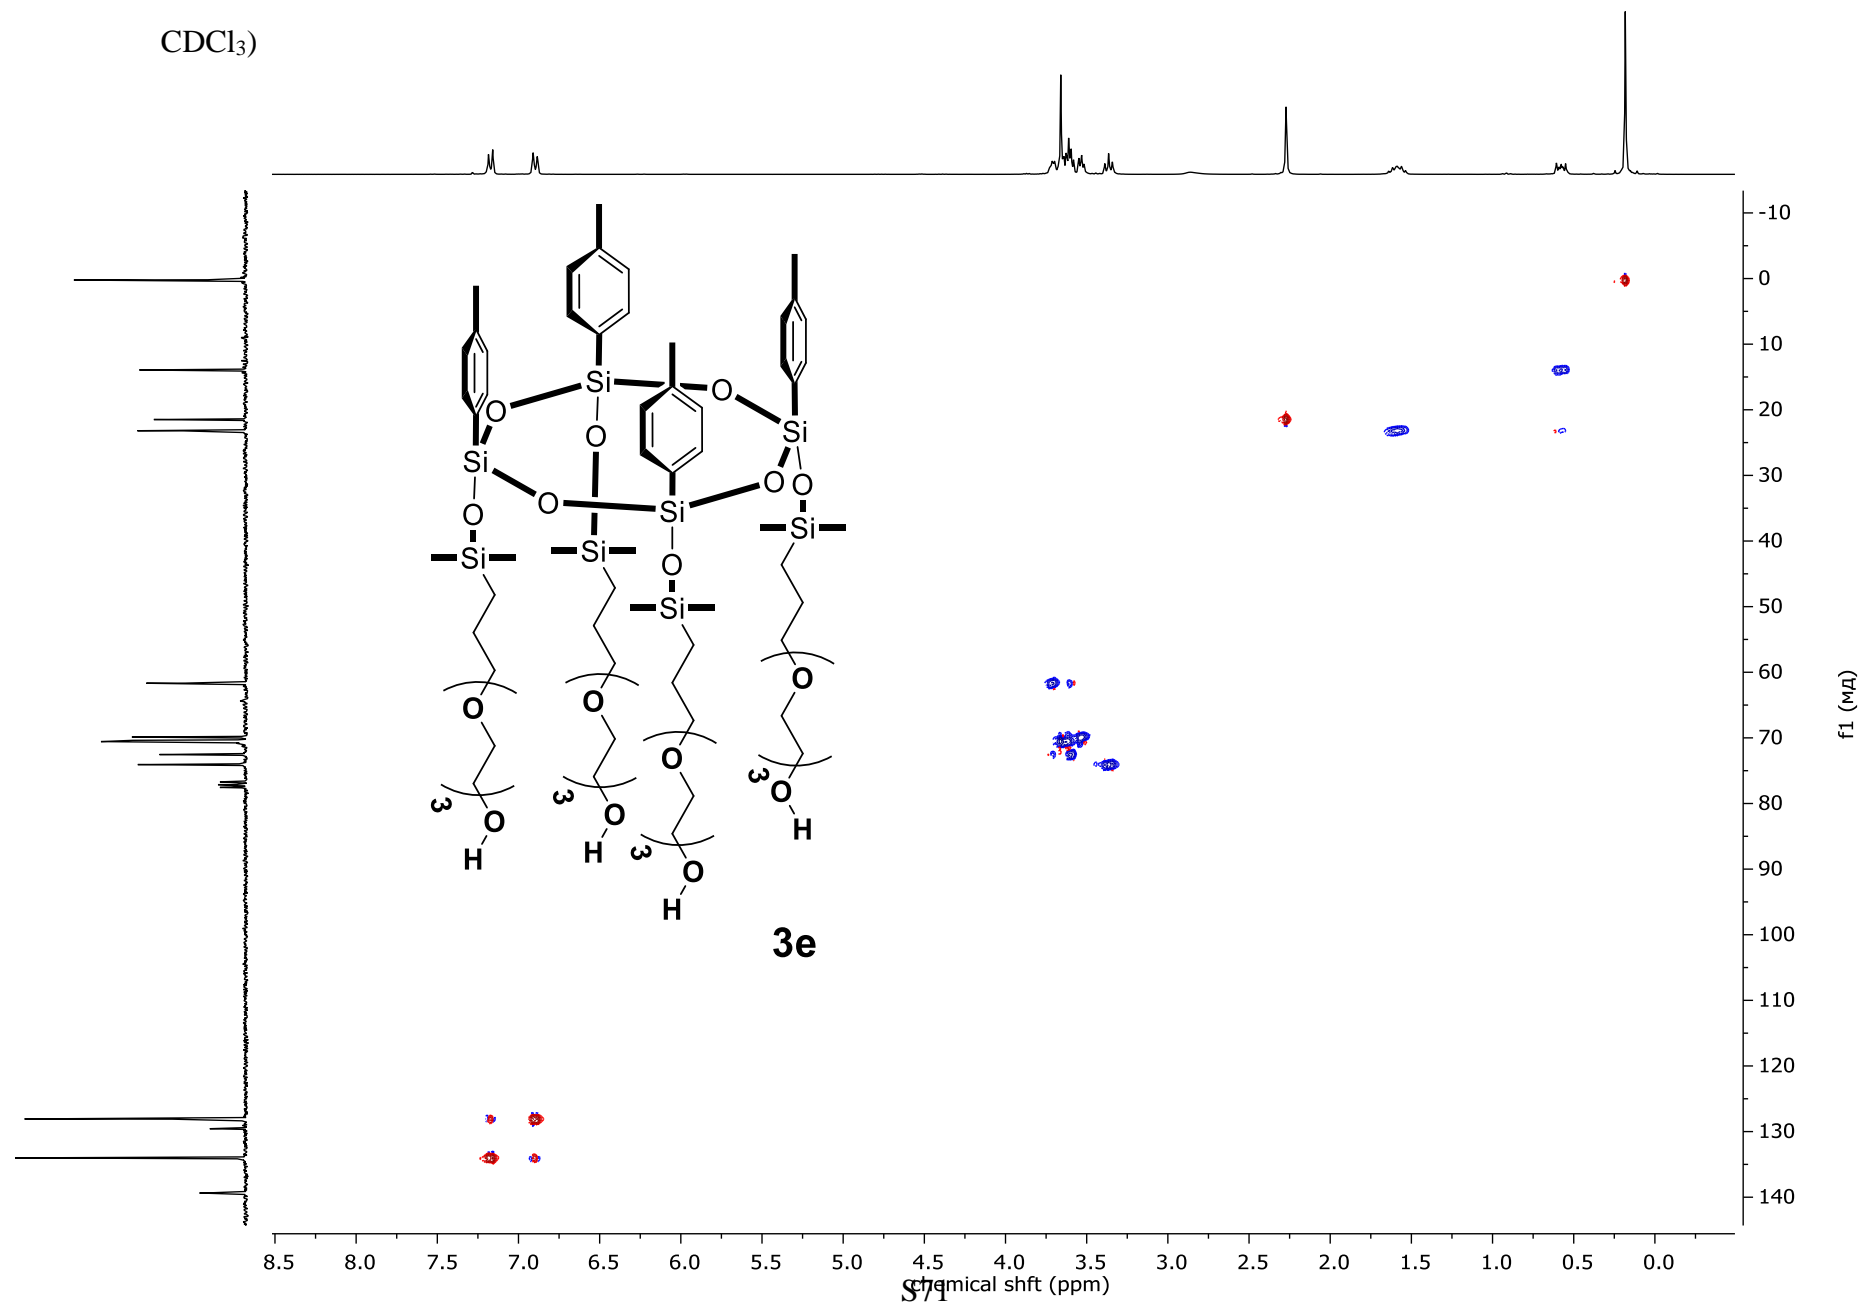

$^1\text{H}, ^{13}\text{C}$ -HMBC NMR,  
( $^1\text{H}$ : 400 MHz,  $^{13}\text{C}$ : 100 MHz,  
 $\text{CDCl}_3$ )

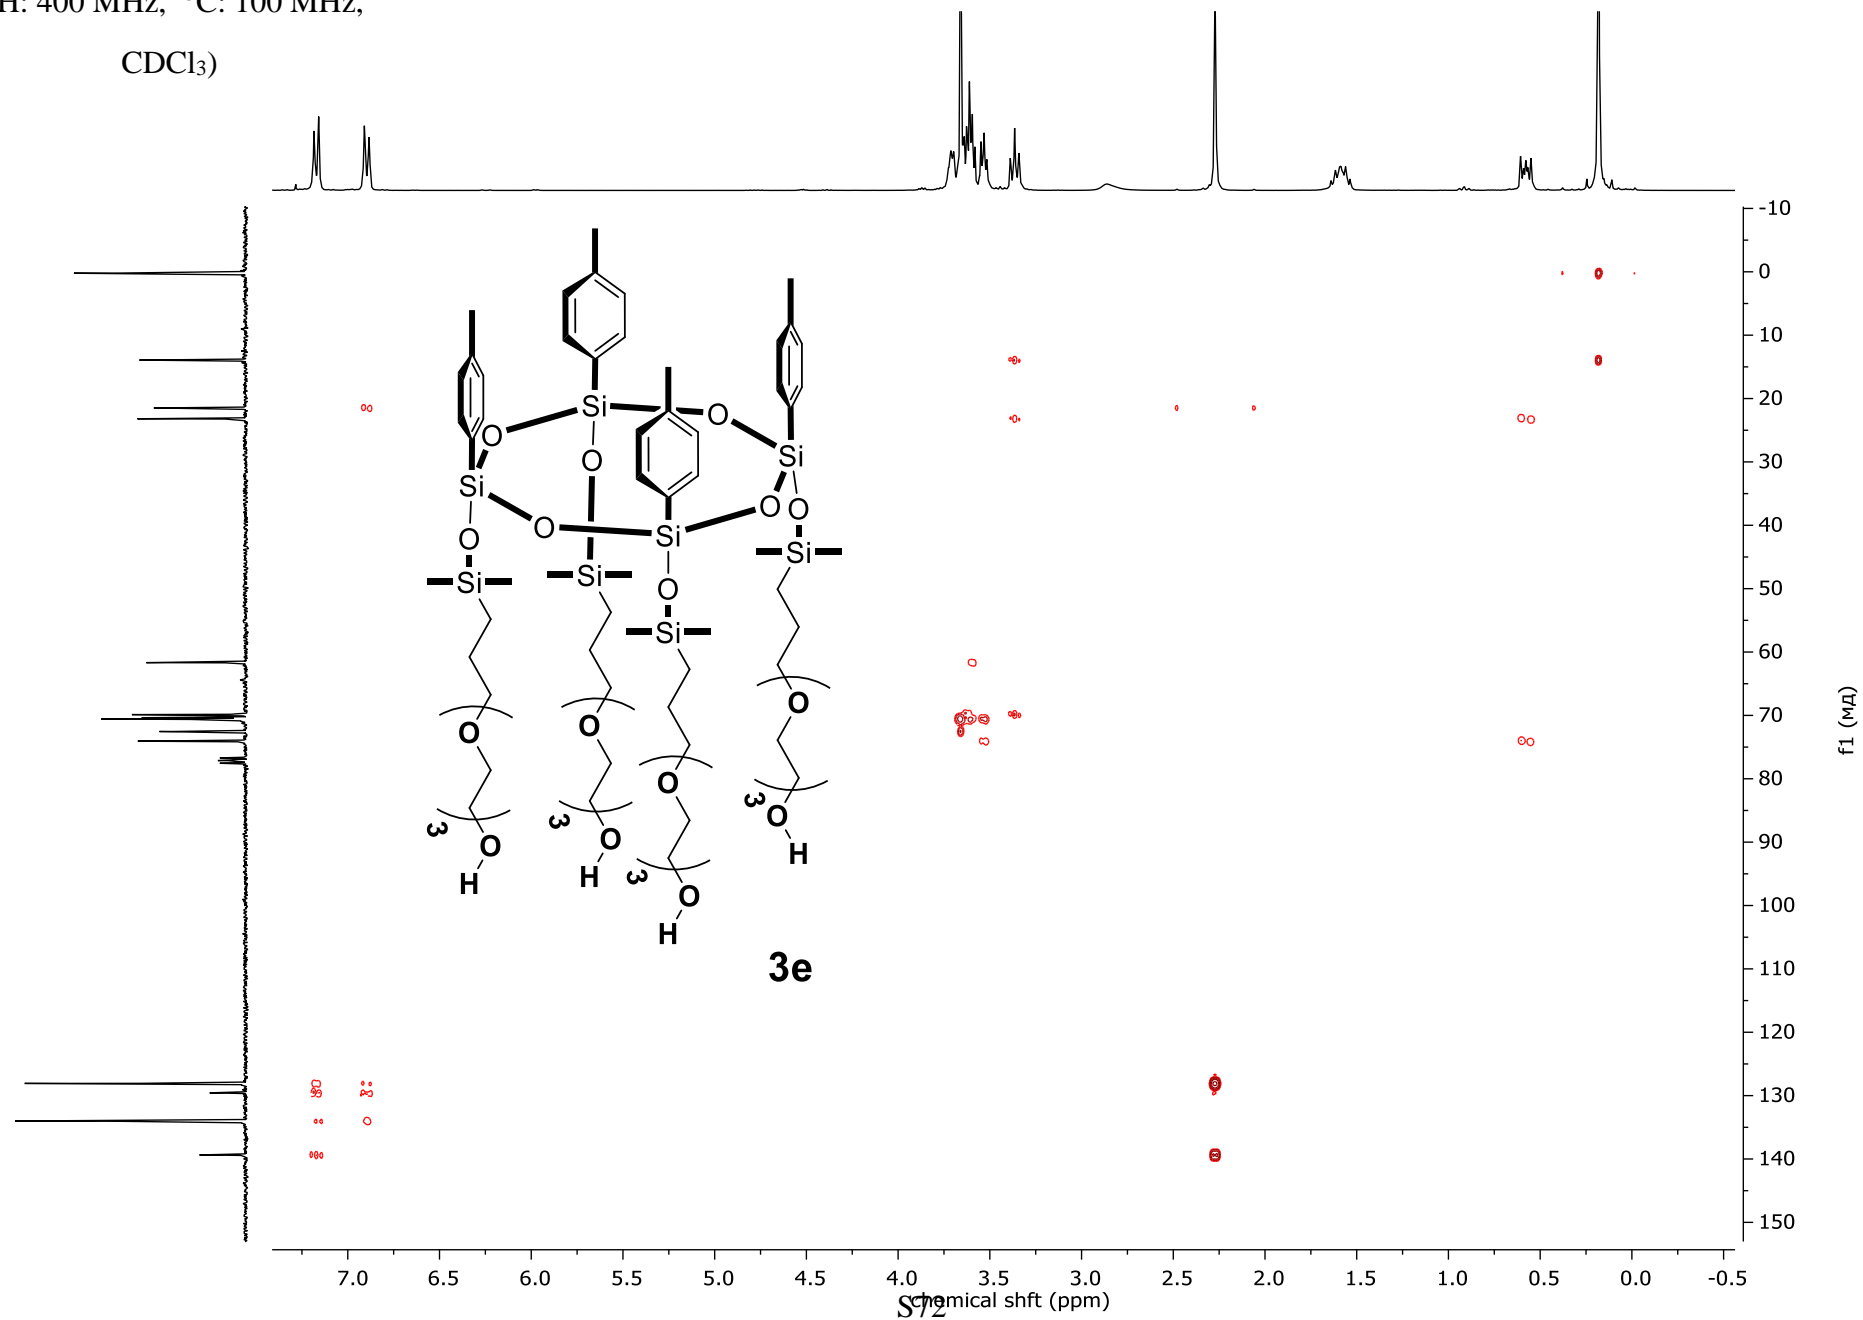



$^1\text{H}, ^{29}\text{Si}$ -HMBC NMR,  
( $^1\text{H}$ : 400 MHz,  $^{29}\text{Si}$ : 80 MHz,  
 $\text{CDCl}_3$ )

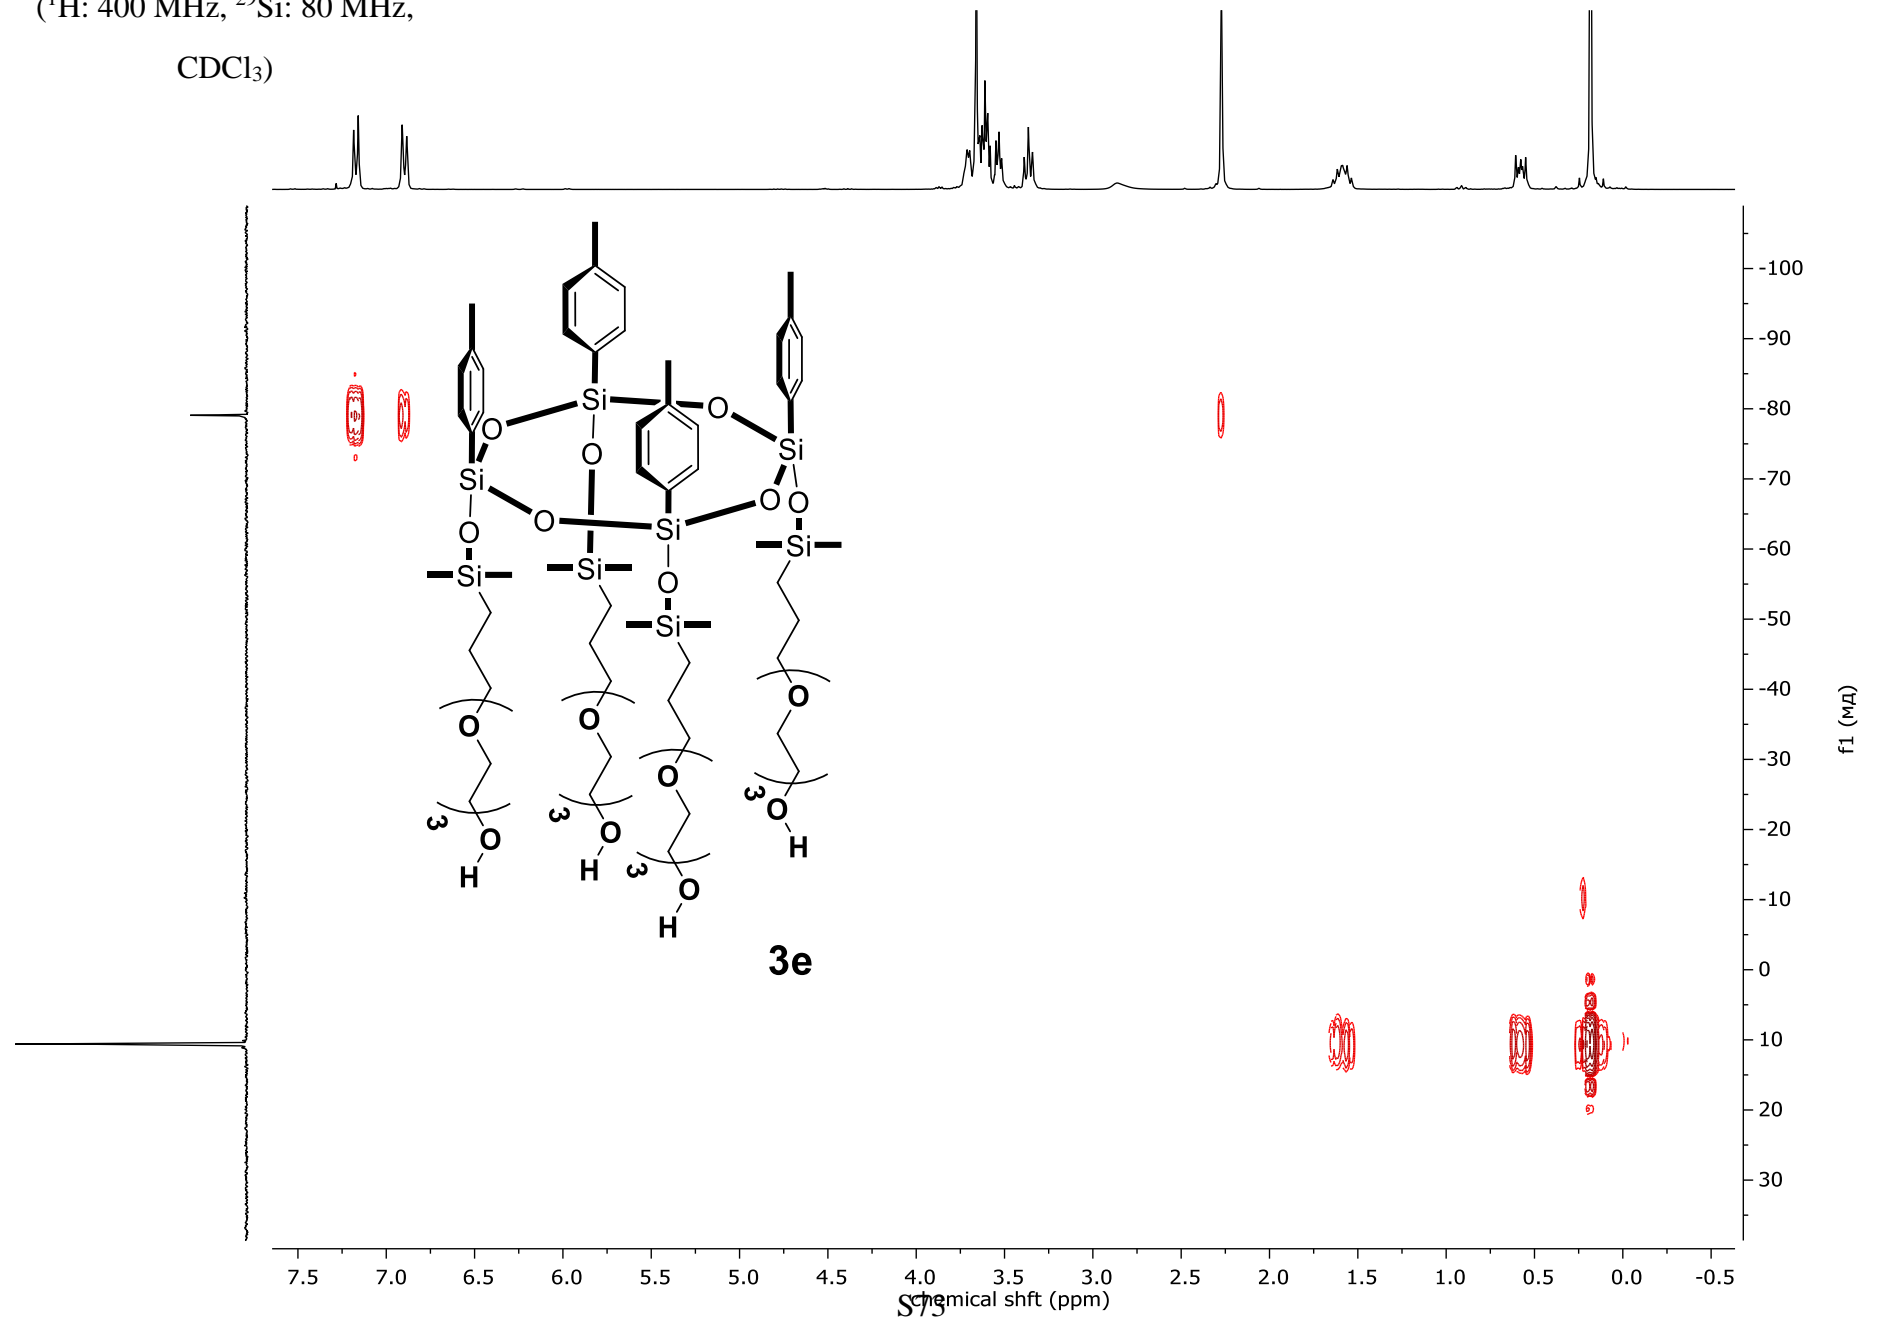

IR-spectrum

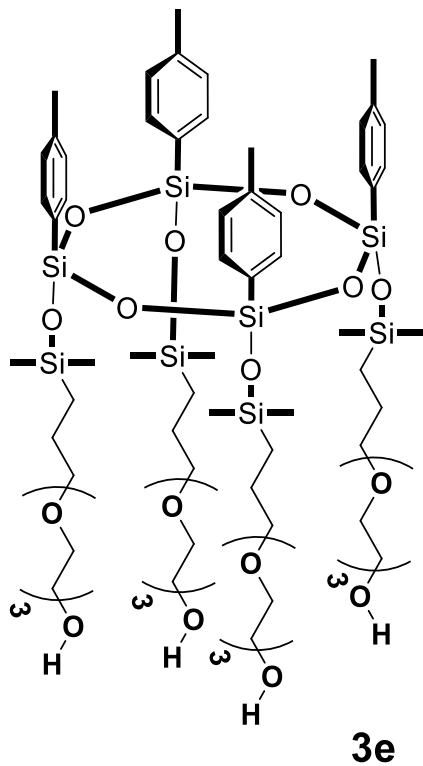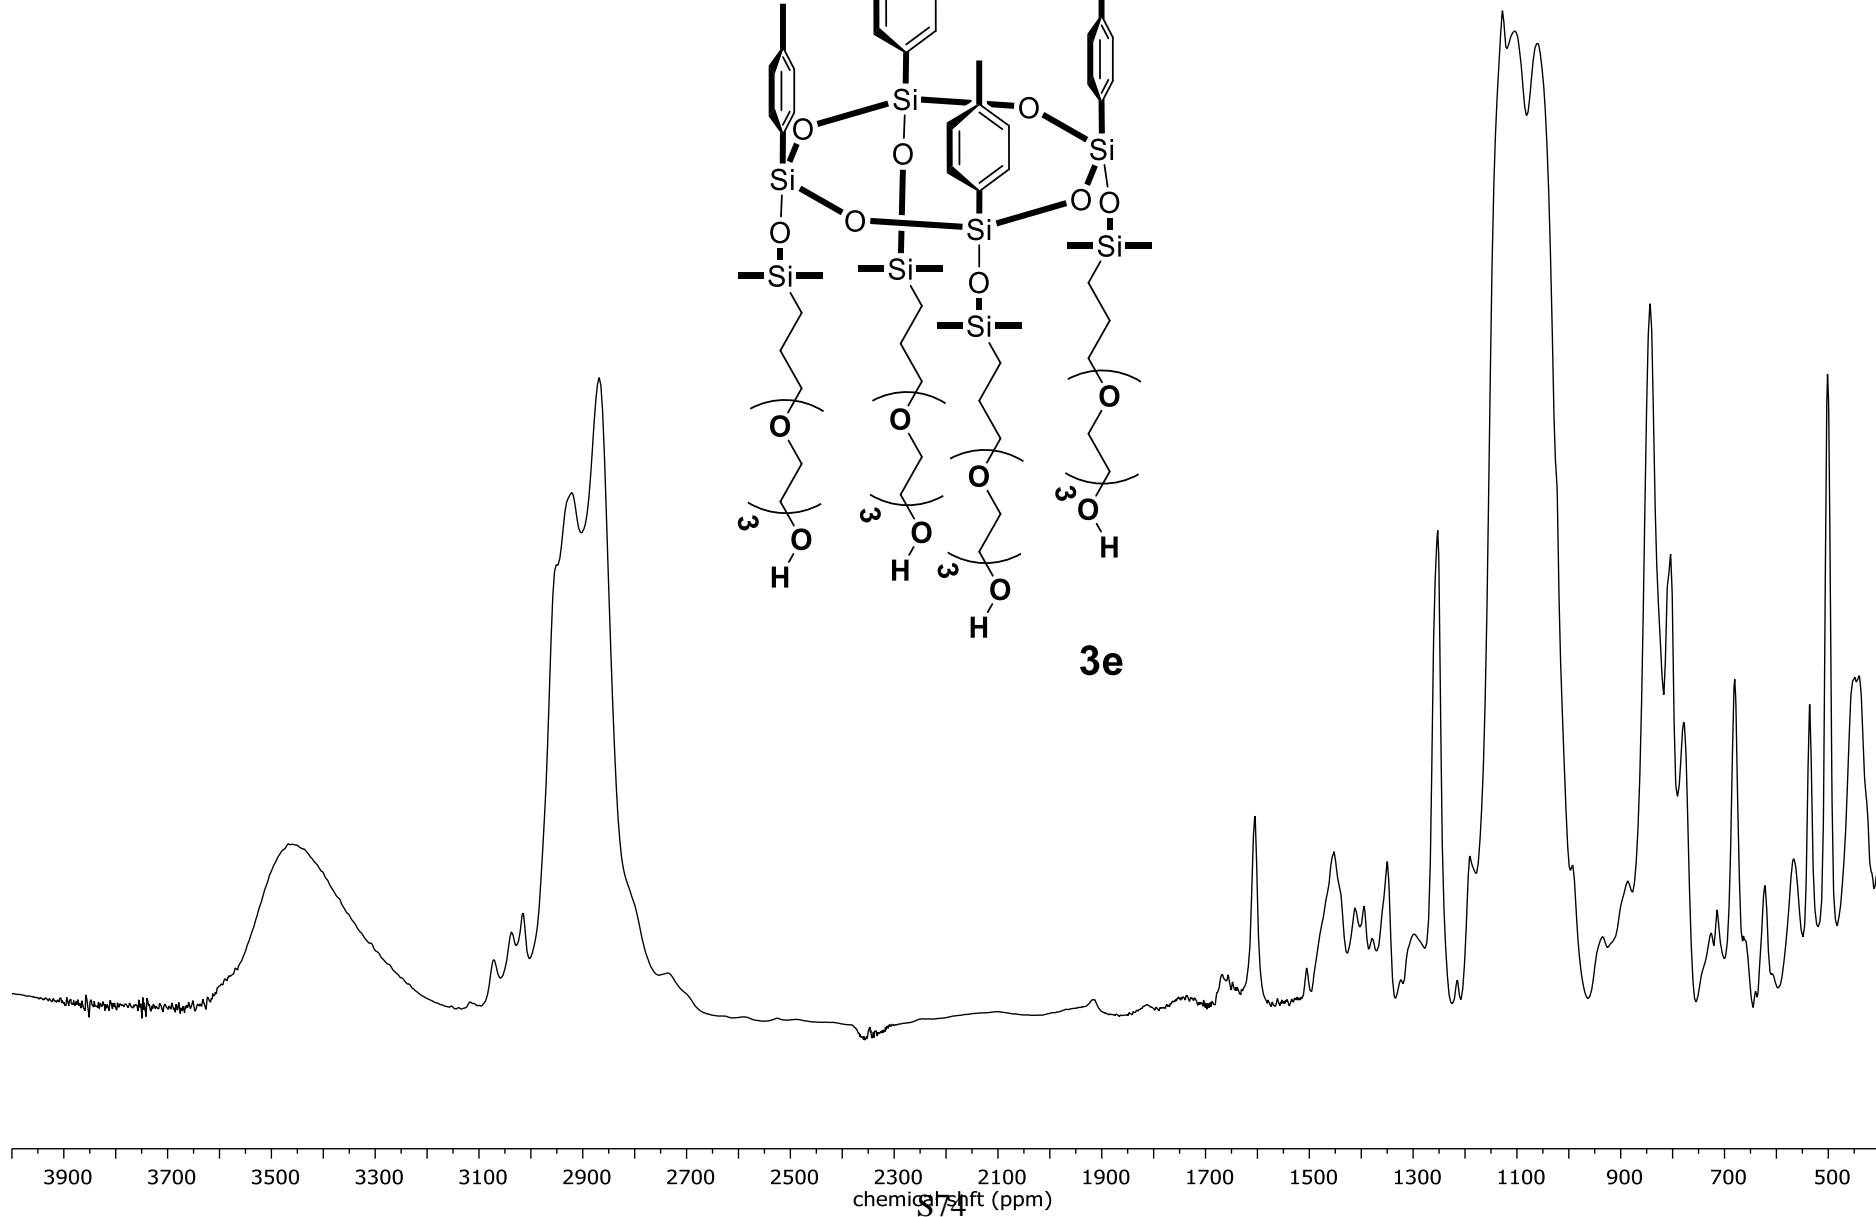

HRMS (ESI)

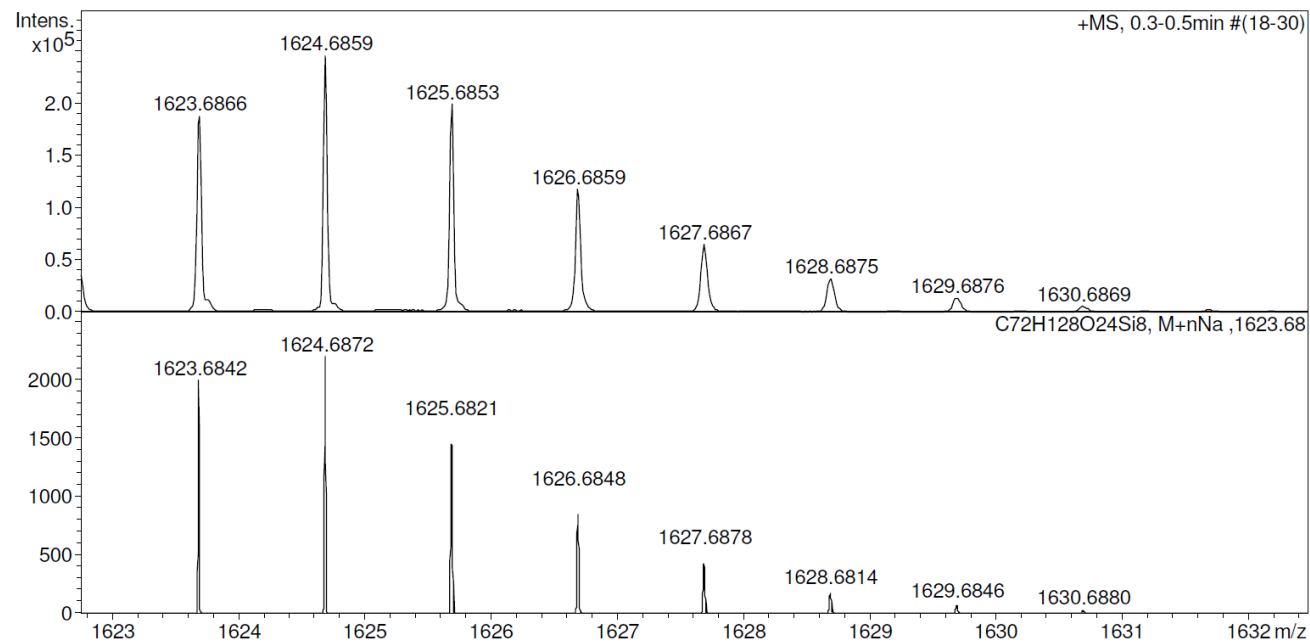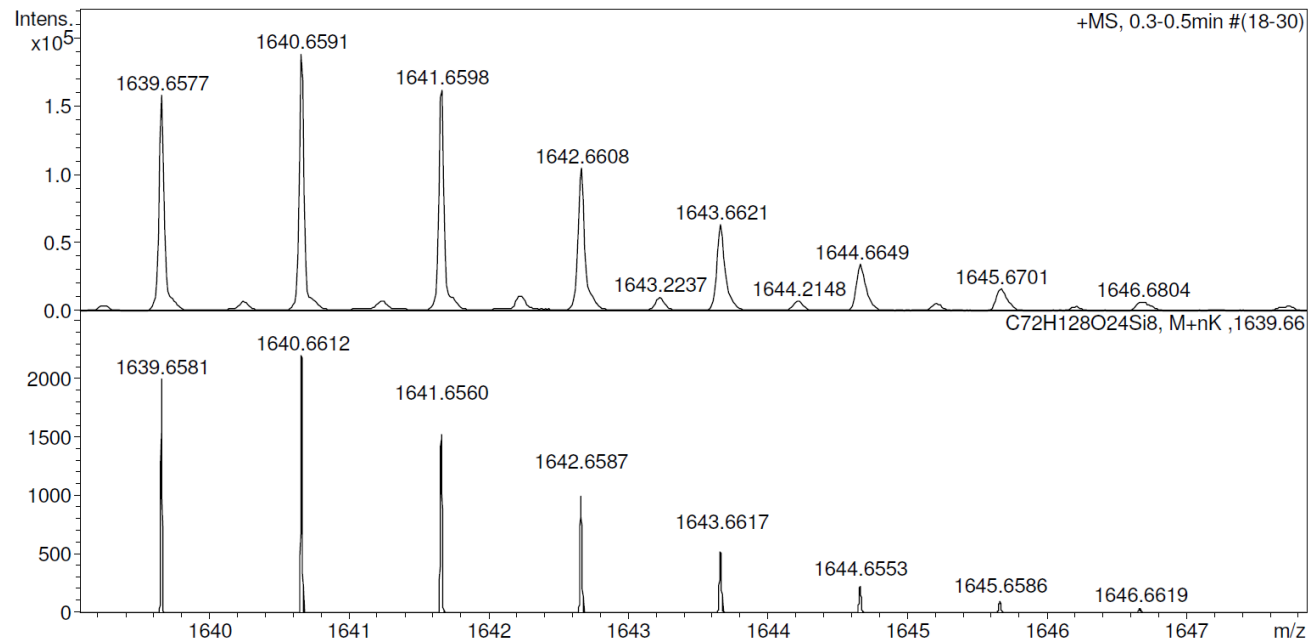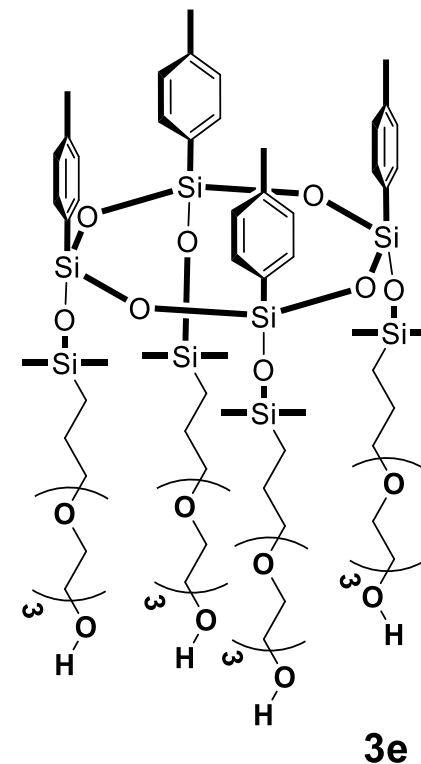

$^1\text{H}$  NMR  
(400 MHz,  $\text{CDCl}_3$ )

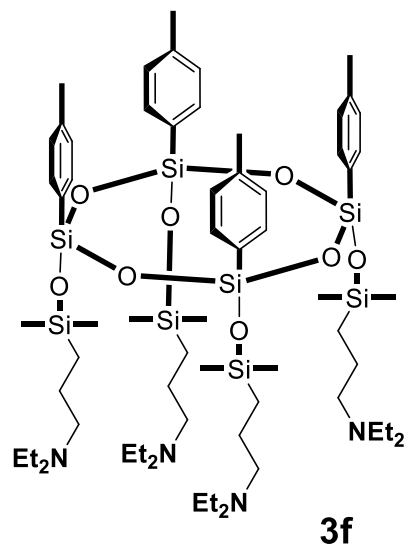

7.28  
7.20  
7.18  
6.91  
6.90

2.47  
2.35  
2.28

1.41

0.99

0.54

0.20

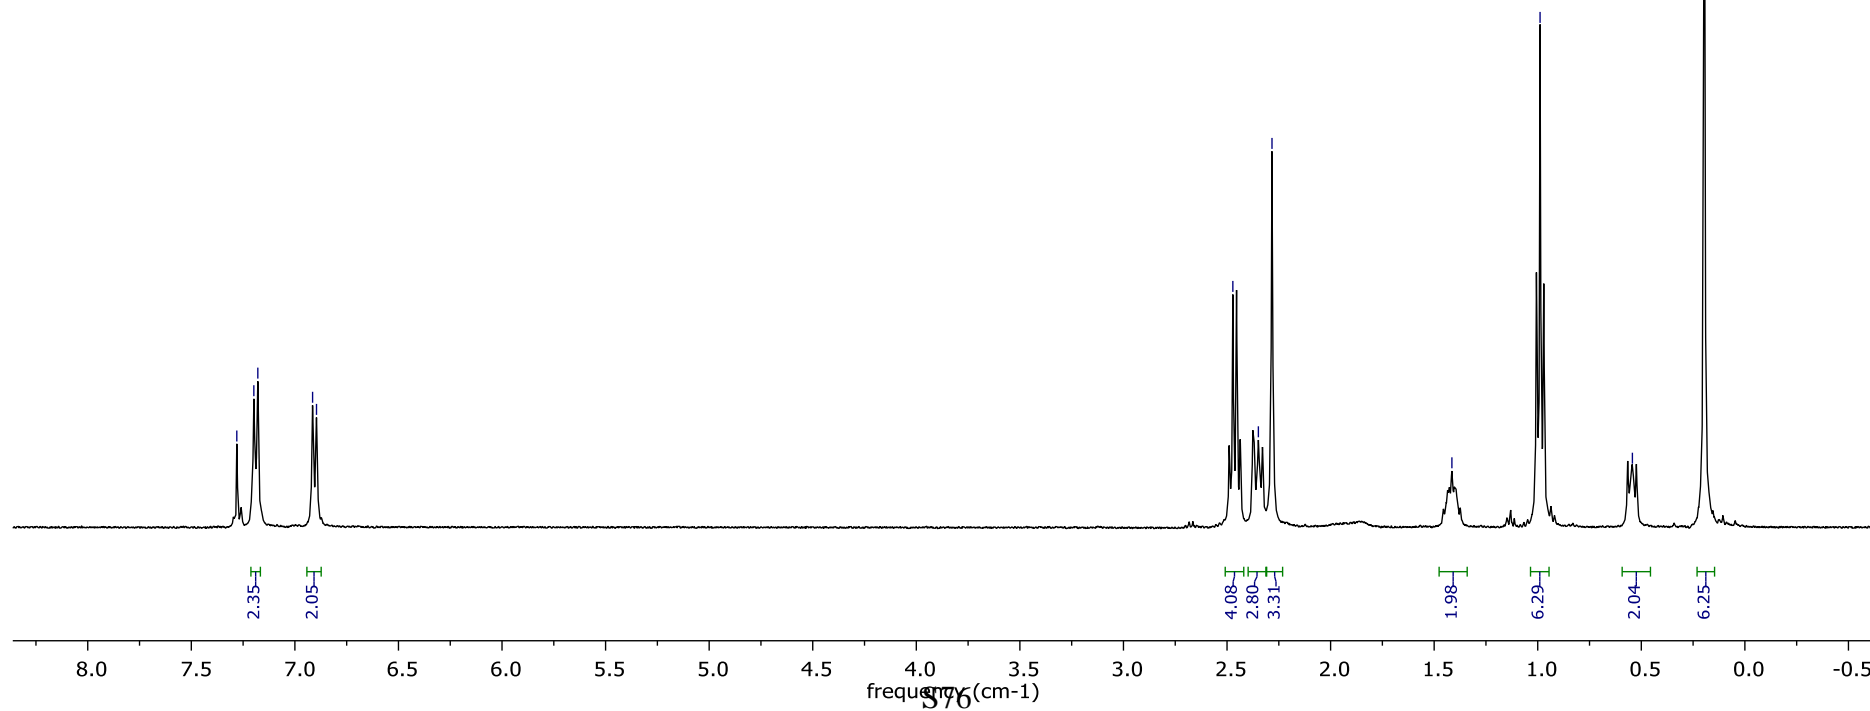

$^{13}\text{C}$  NMR  
(100 MHz,  $\text{CDCl}_3$ )

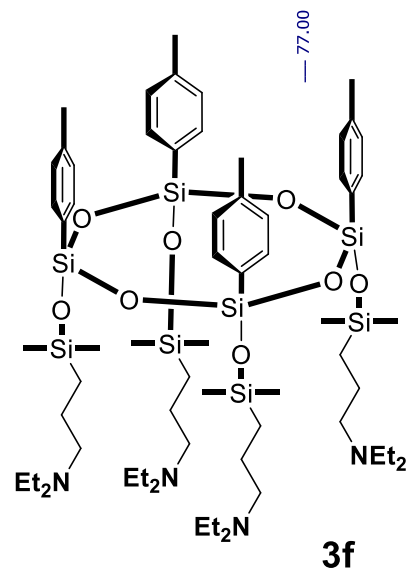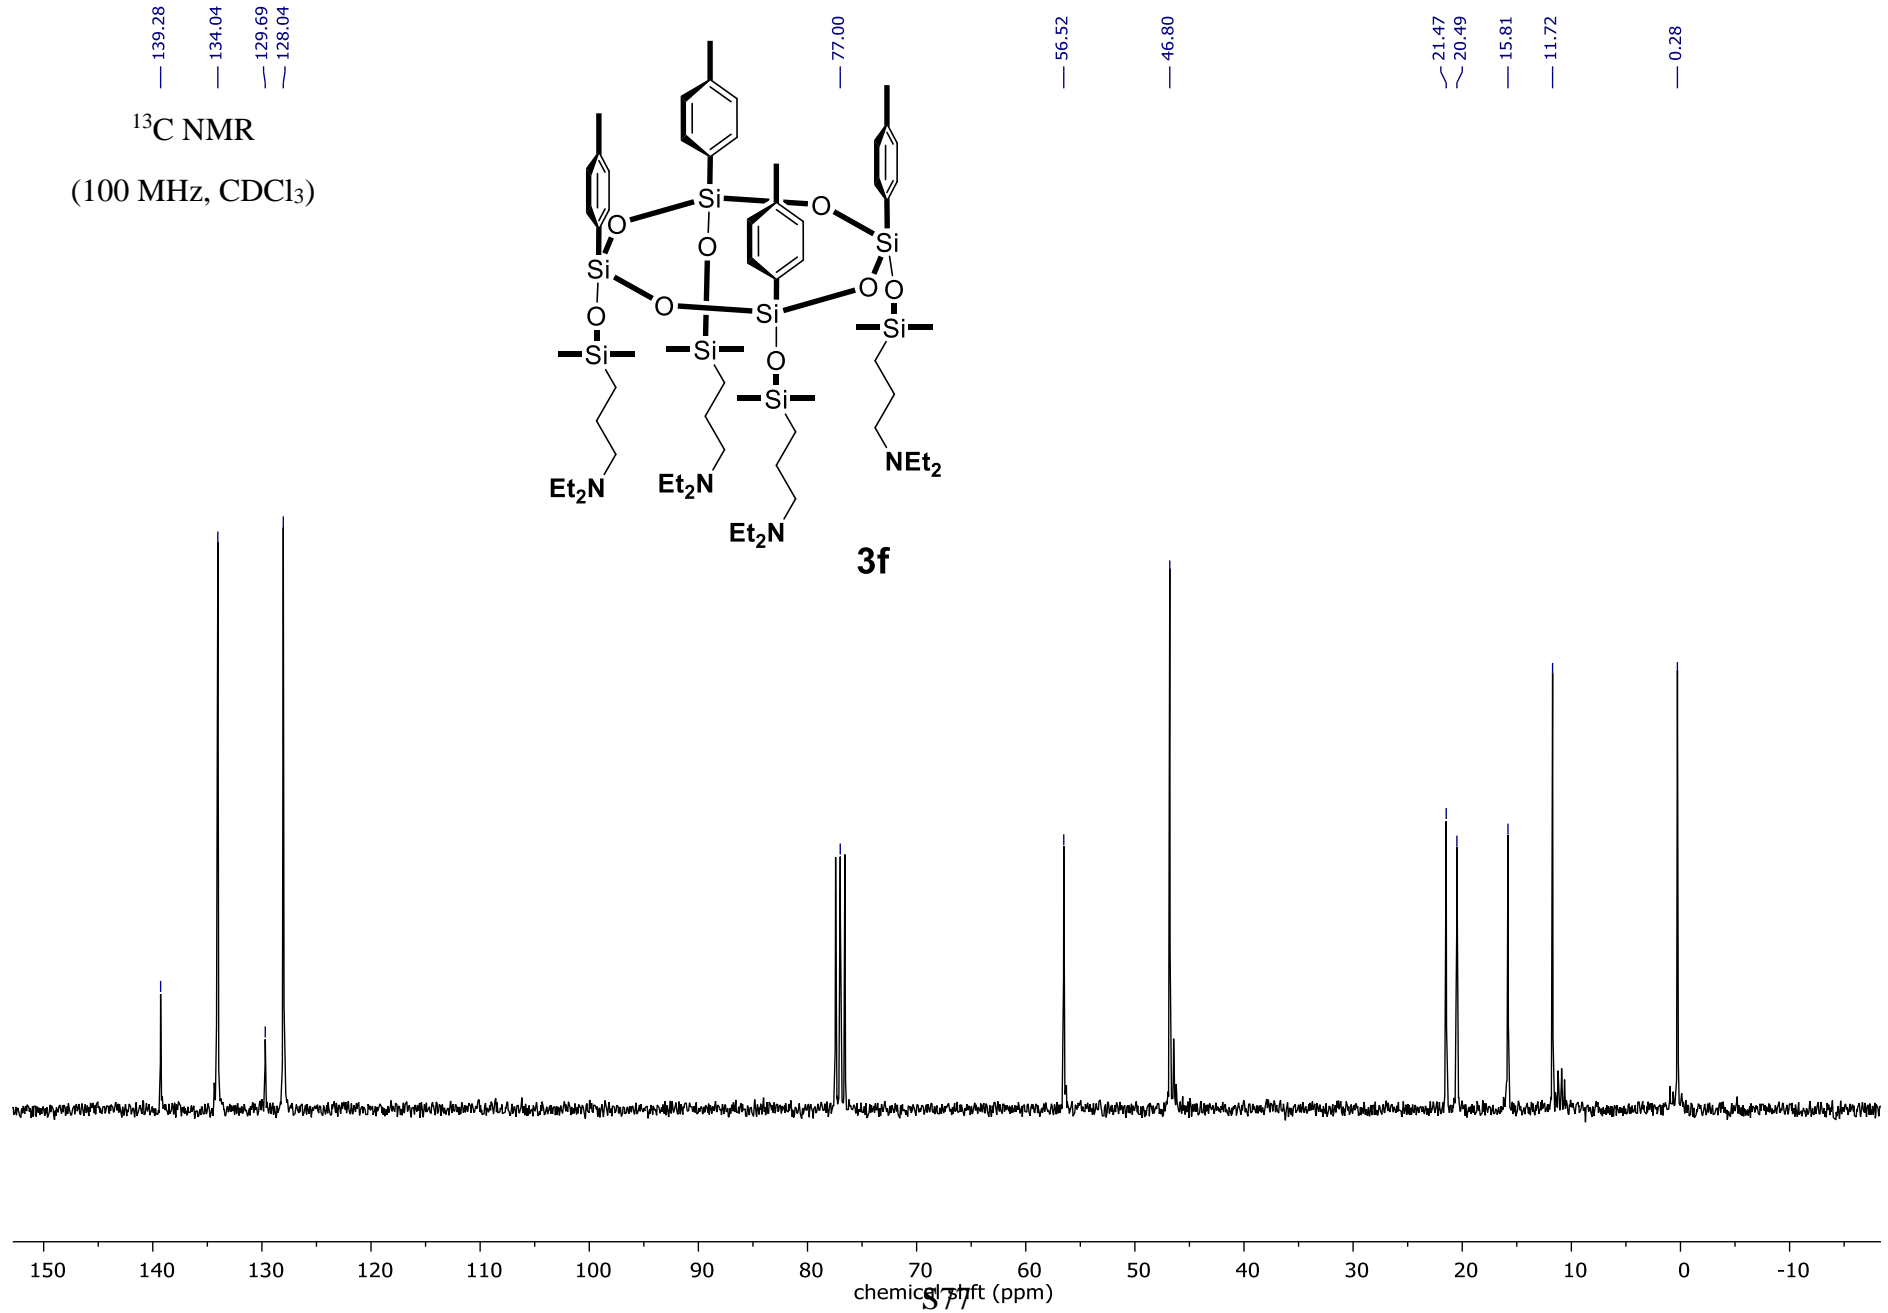

$^{29}\text{Si}$  NMR  
(80 MHz,  $\text{CDCl}_3$ )

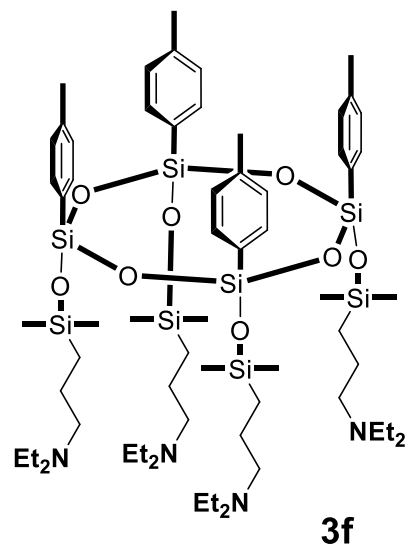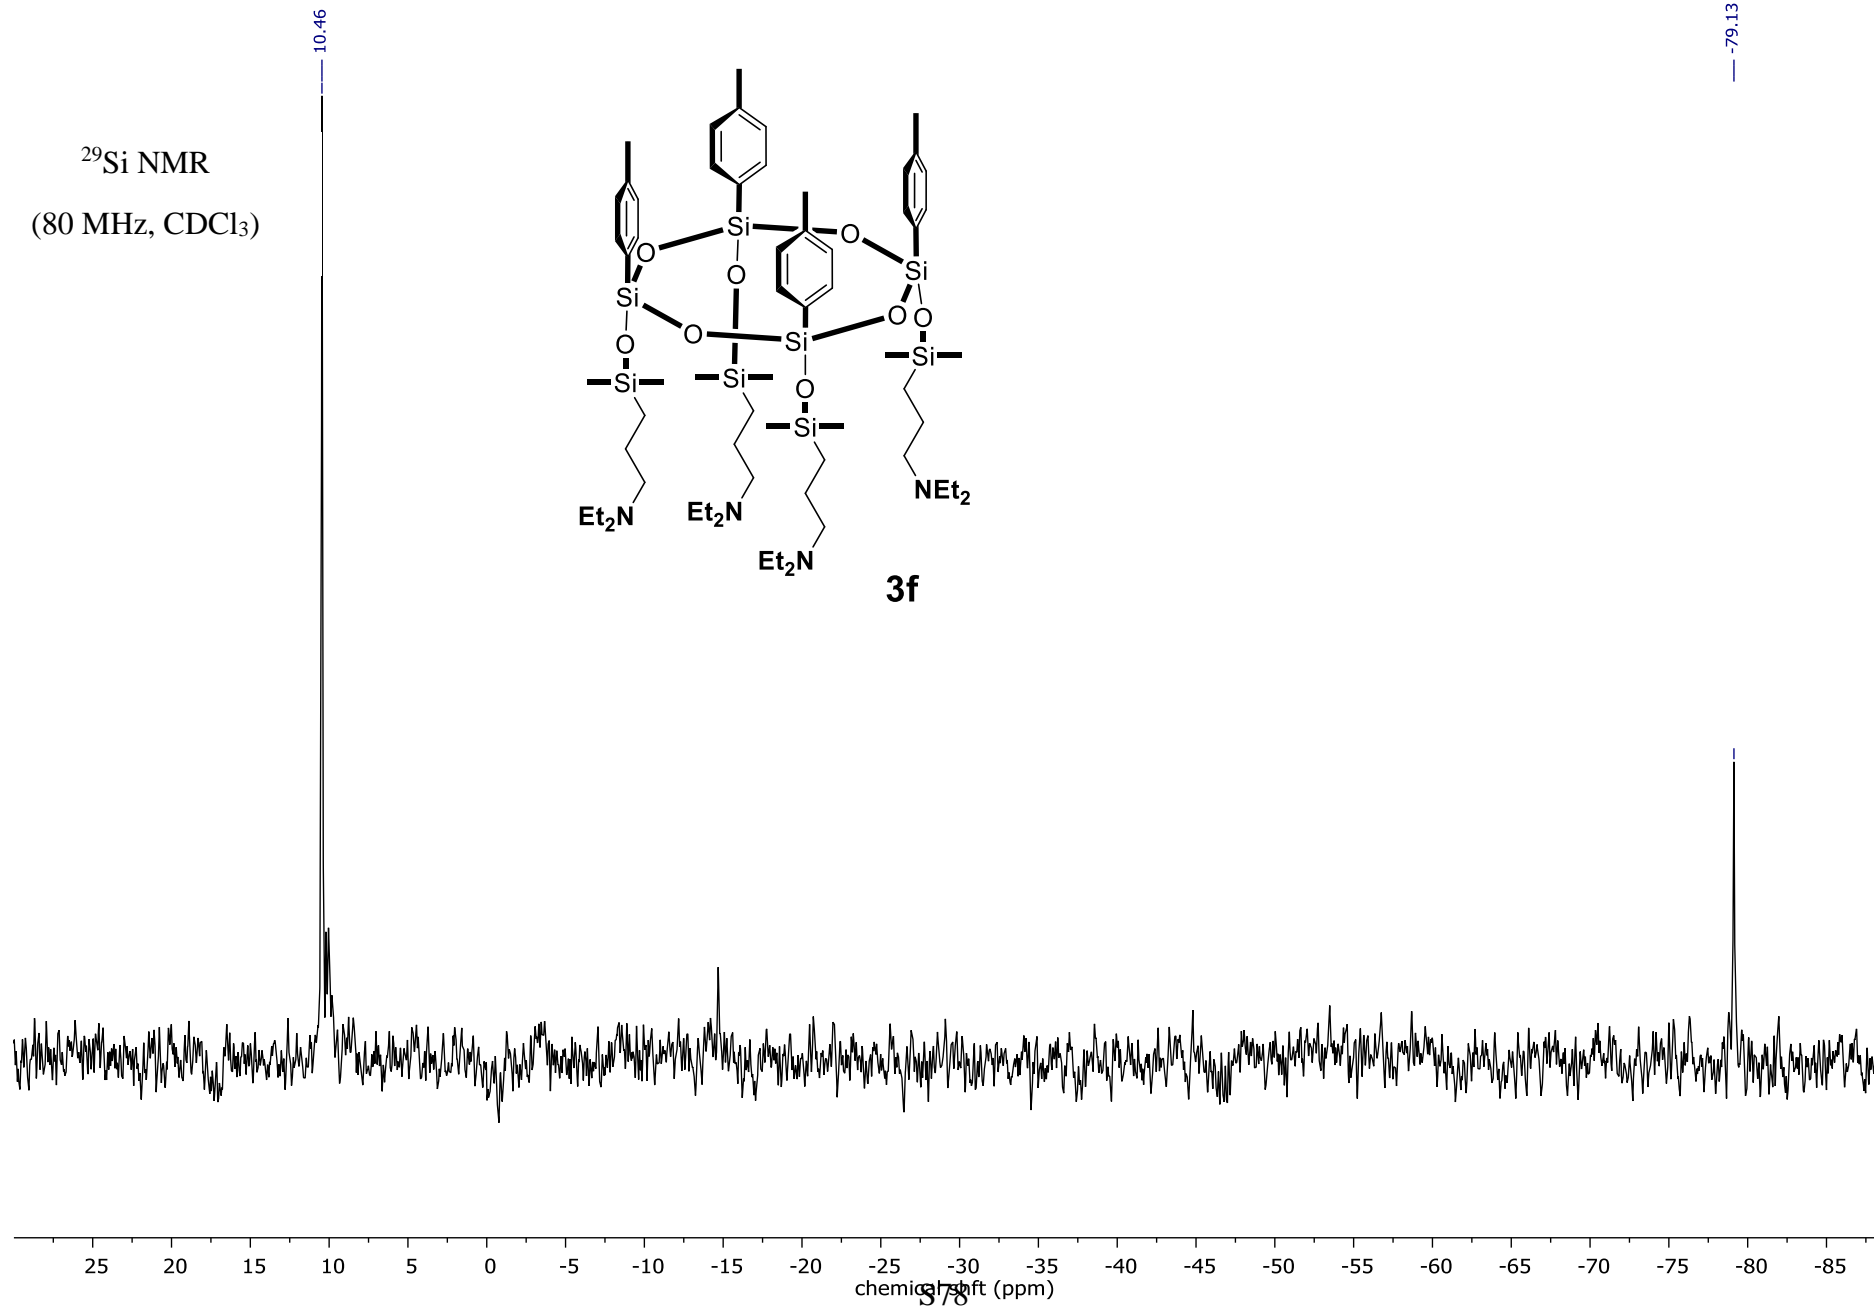

$^1\text{H}$ ,  $^{13}\text{C}$  edited-HSQC NMR,  
( $^1\text{H}$ : 400 MHz,  $^{13}\text{C}$ : 100 MHz,  
 $\text{CDCl}_3$ )

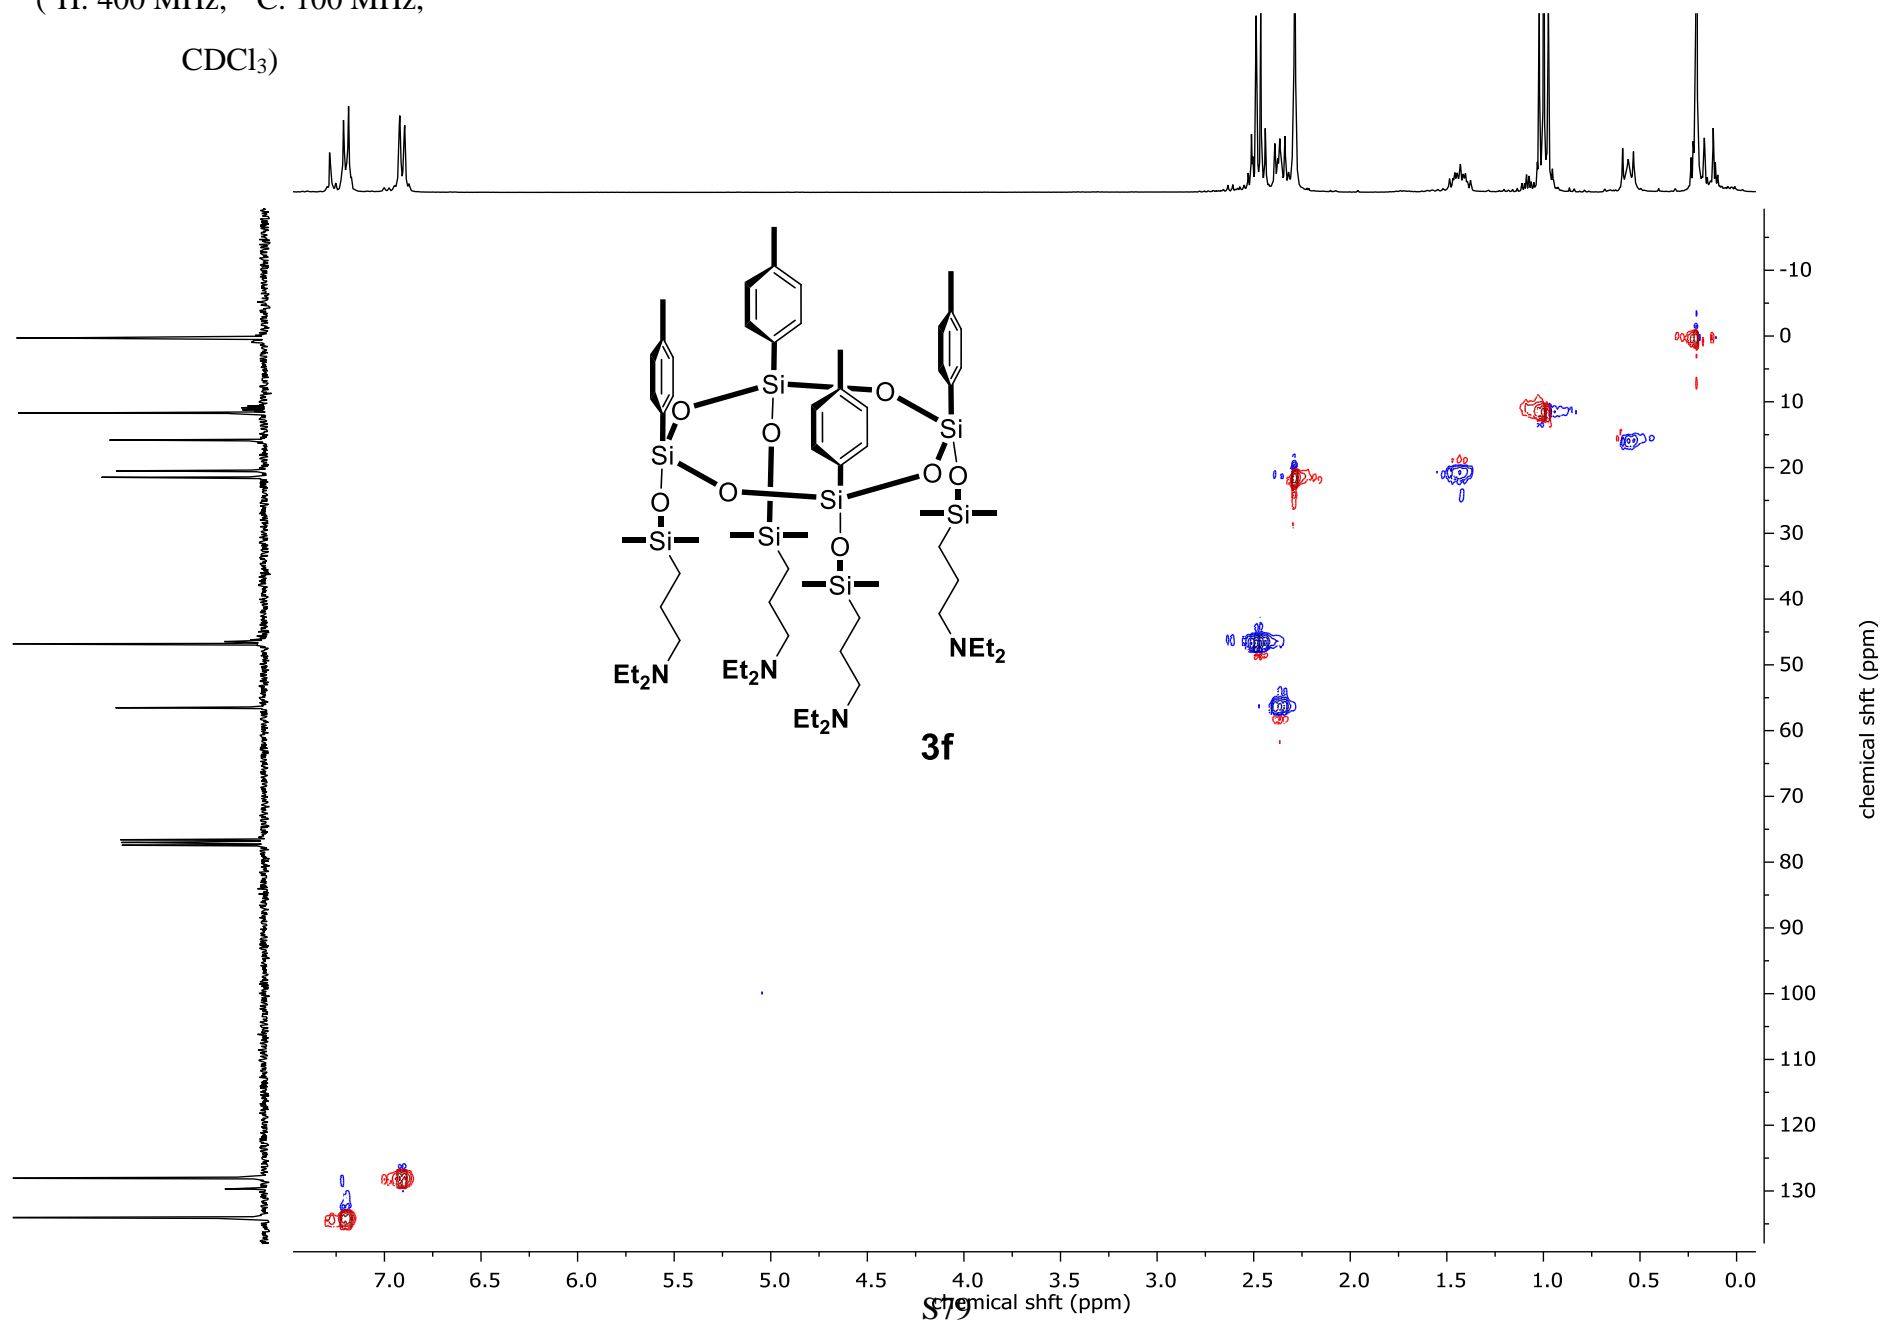

$^1\text{H}, ^{13}\text{C}$ -HMBC NMR,

( $^1\text{H}$ : 400 MHz,  $^{13}\text{C}$ : 100 MHz,

$\text{CDCl}_3$ )

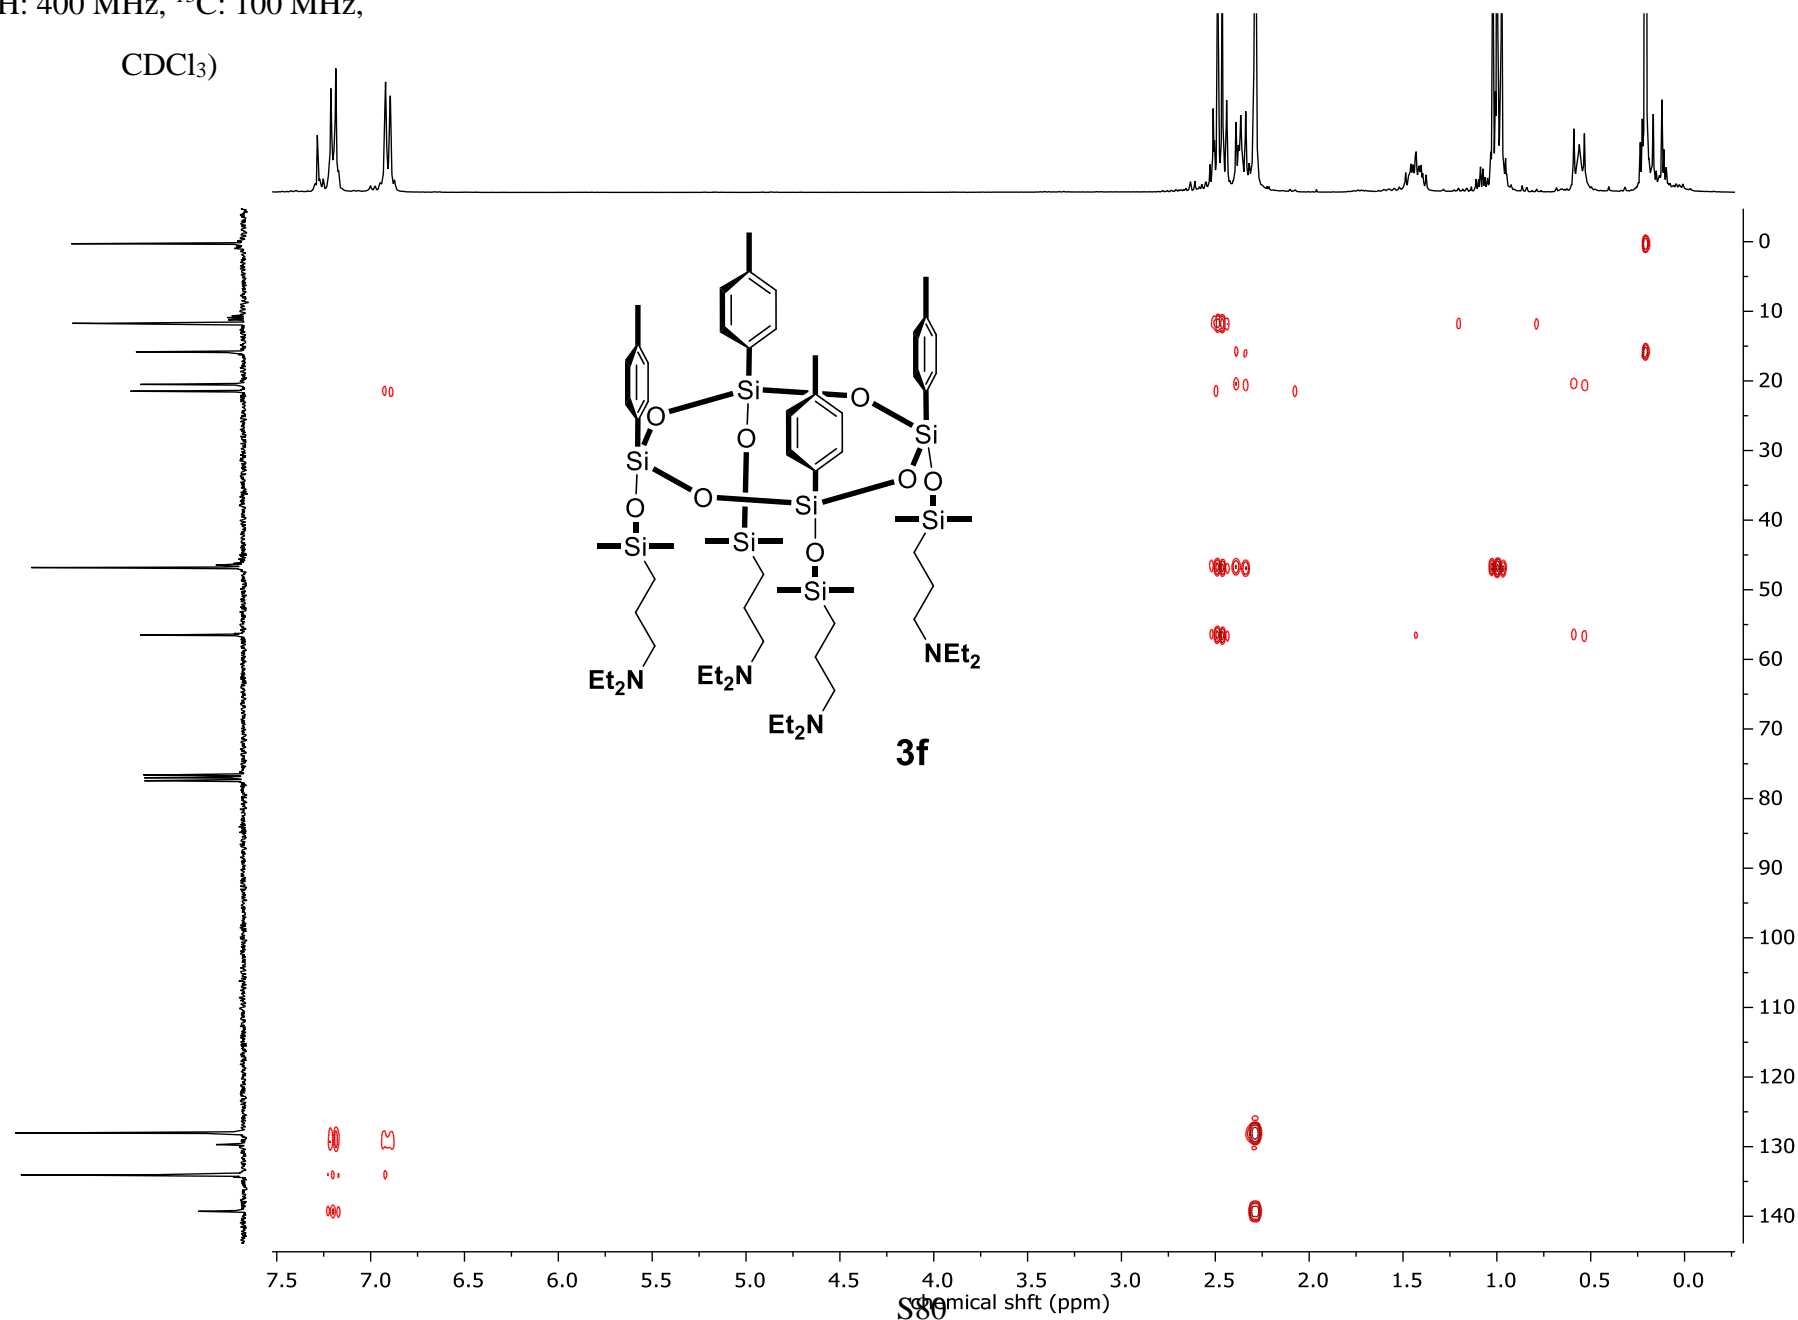



$^1\text{H}, ^{29}\text{Si}$ -HMBC NMR,

( $^1\text{H}$ : 400 MHz,  $^{29}\text{Si}$ : 80 MHz,

$\text{CDCl}_3$ )

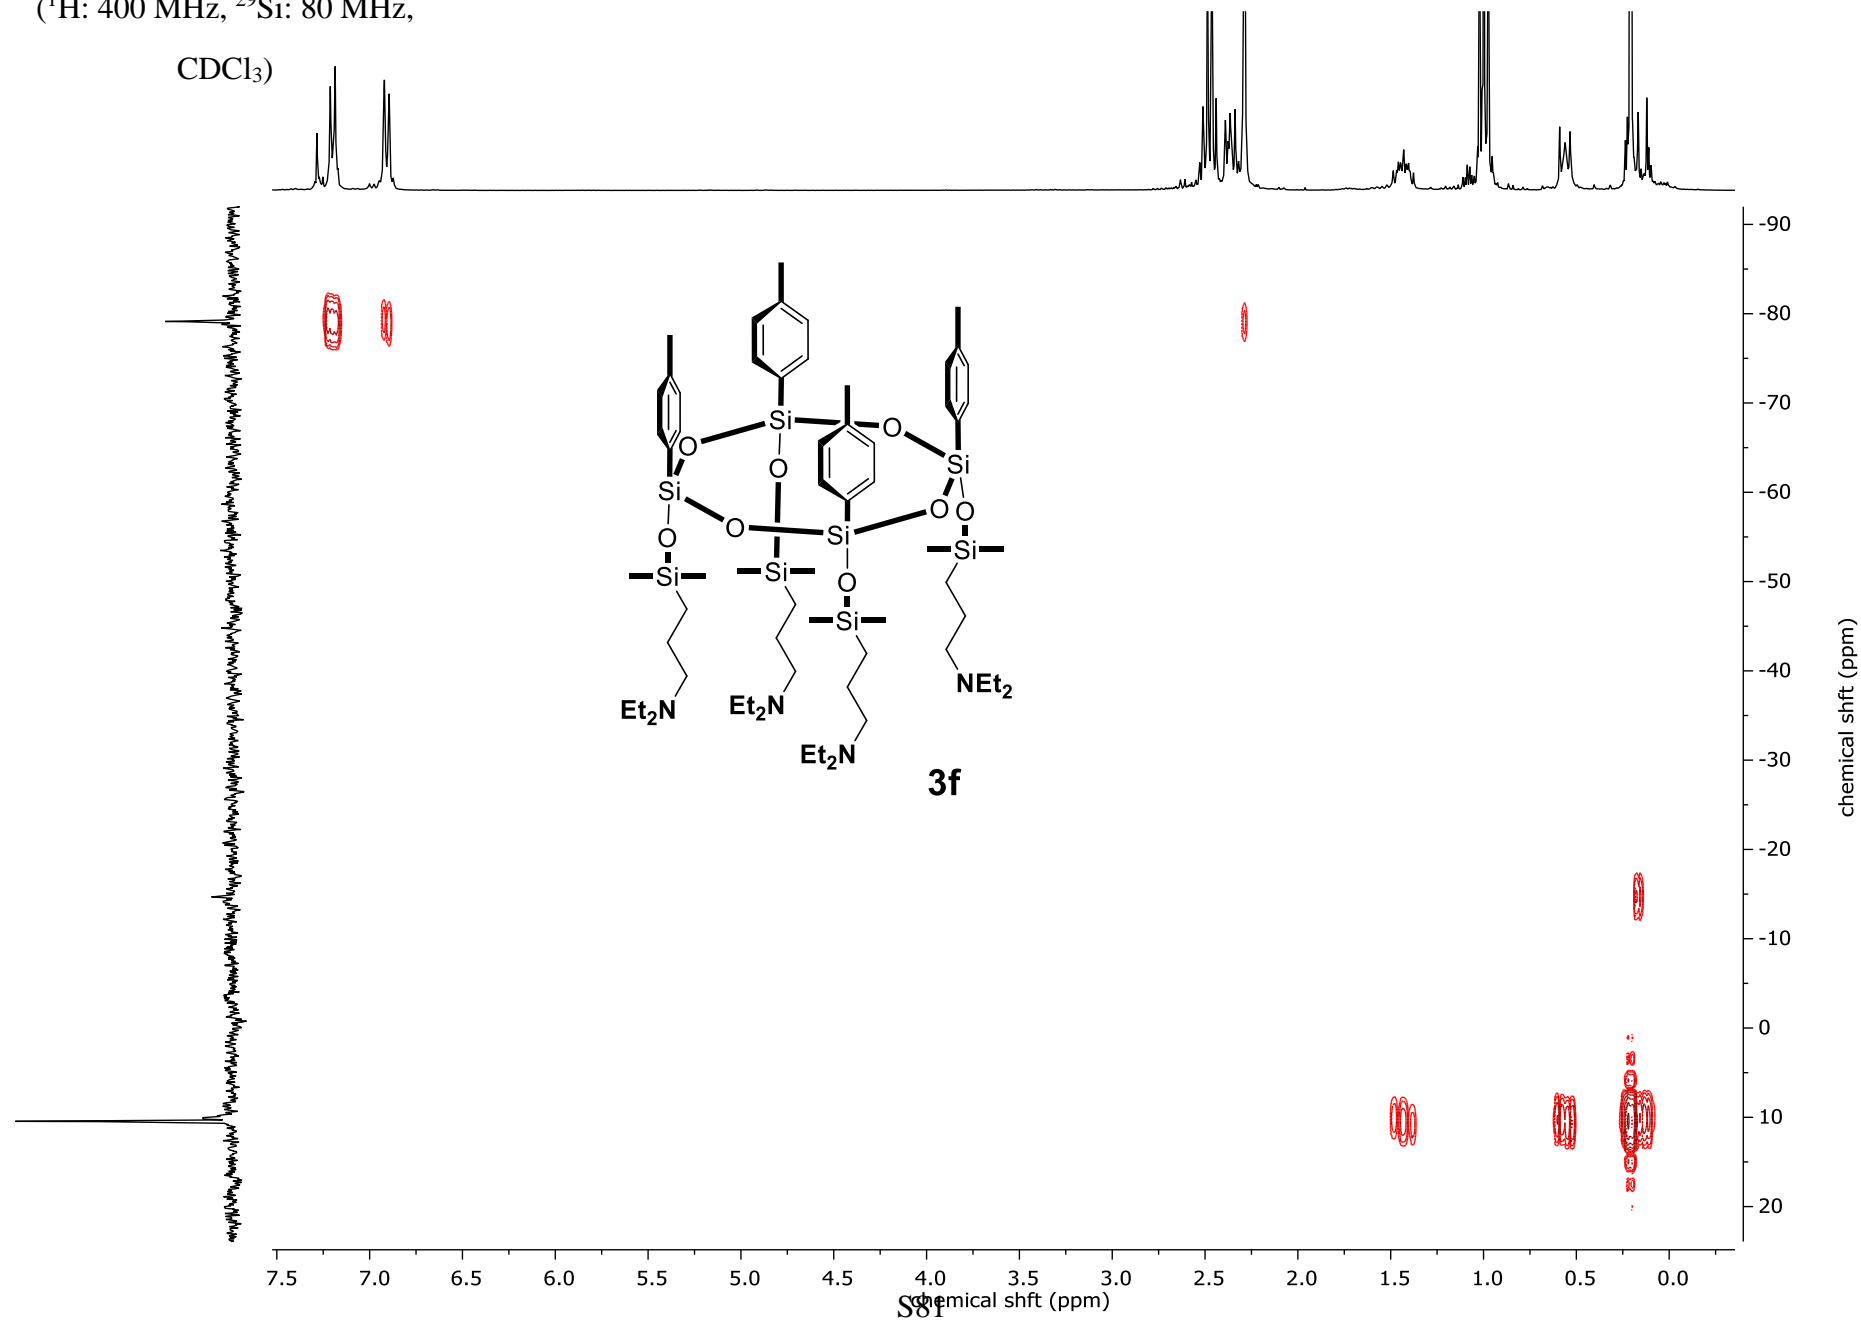

GPC

$M_n = 1006$  (pss)

$M_w = 1061$  (pss)

PDI = 1.05

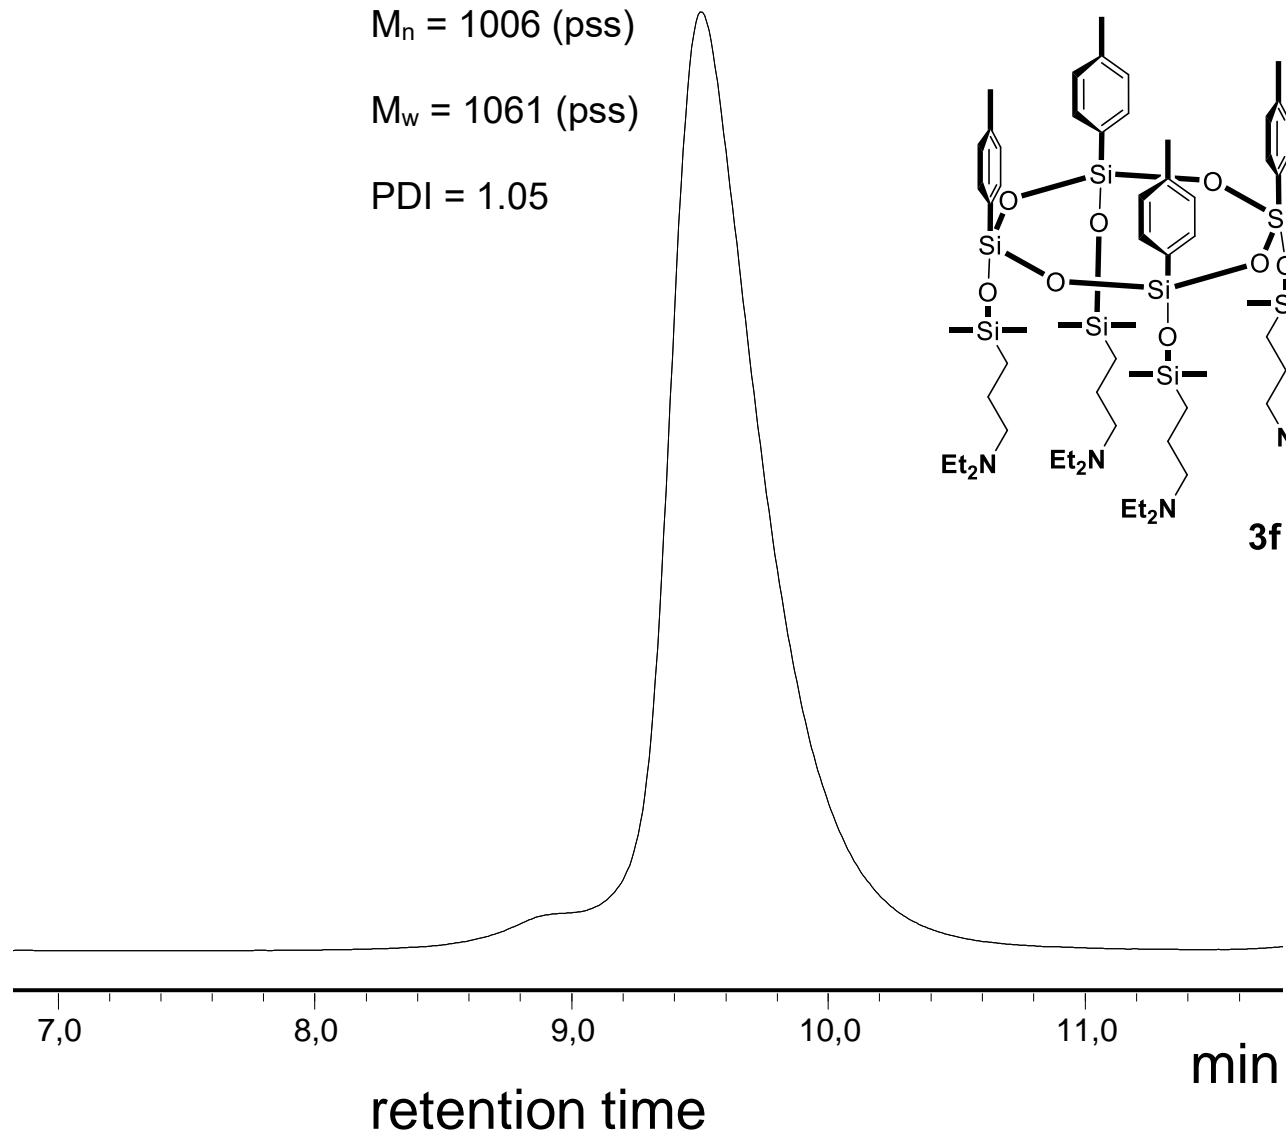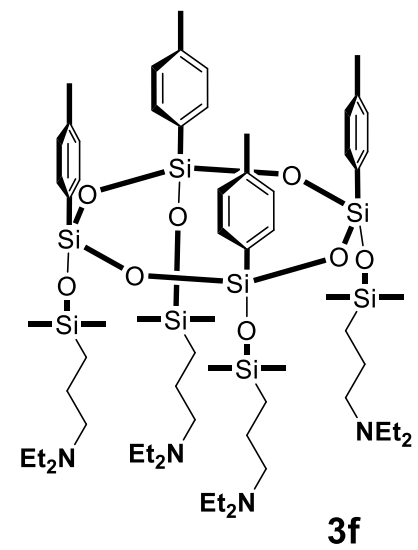

IR-spectrum

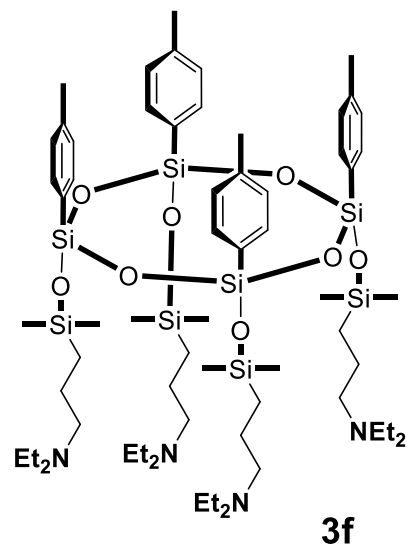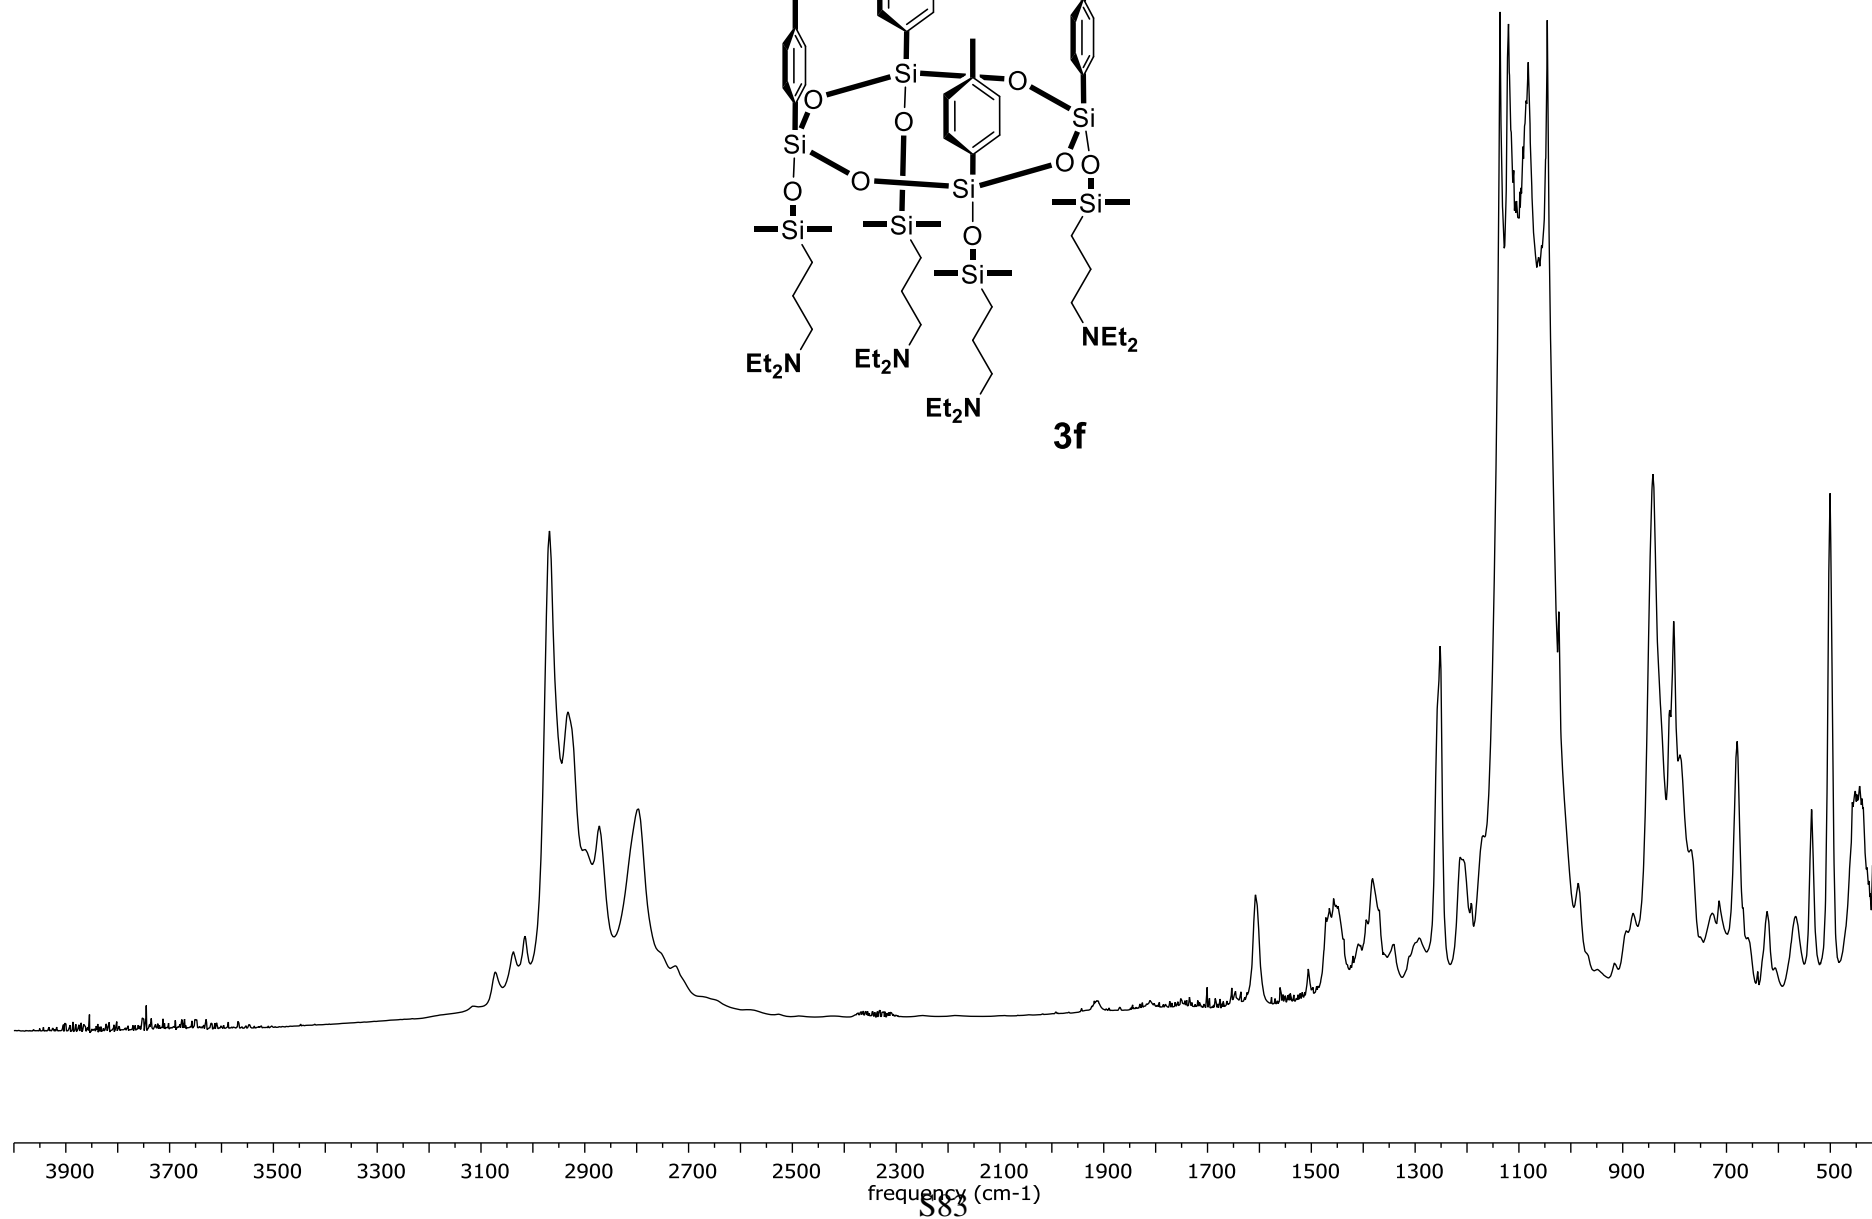

HRMS (ESI)

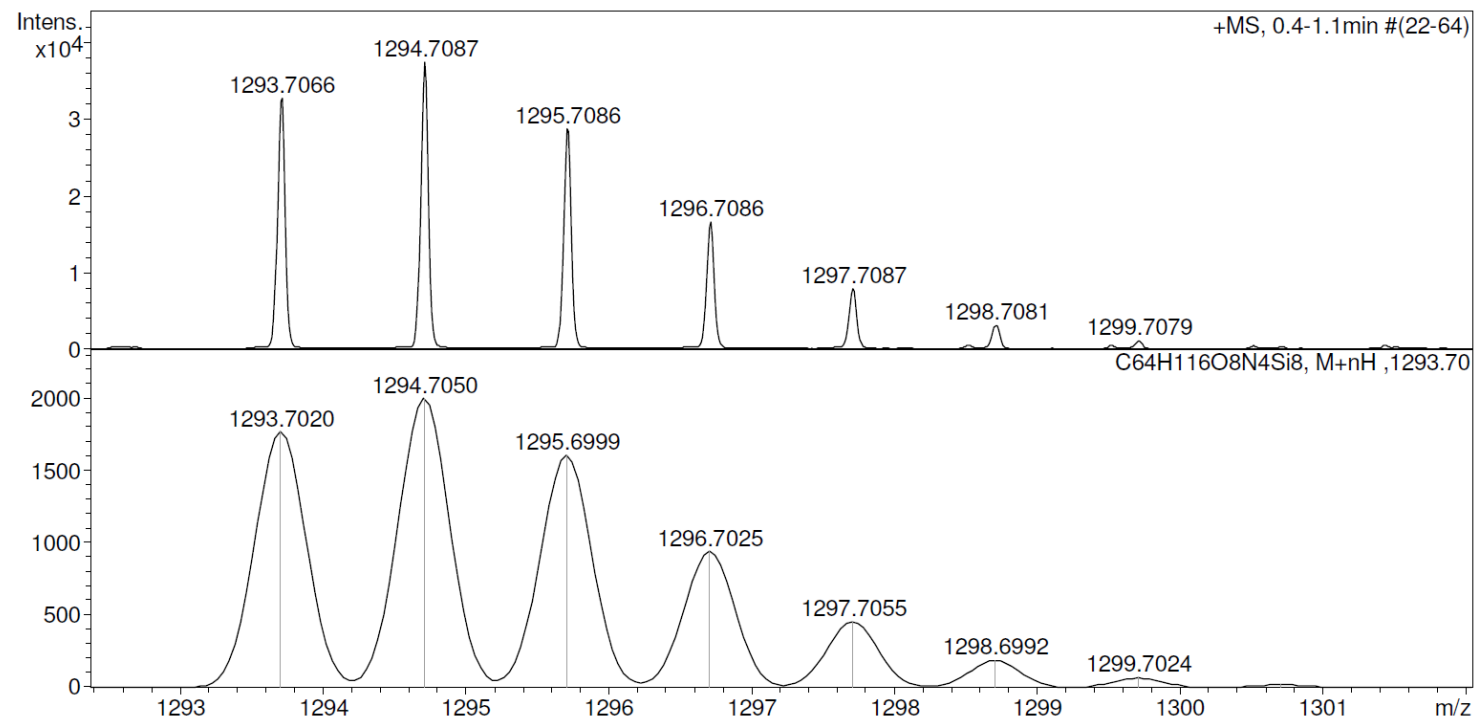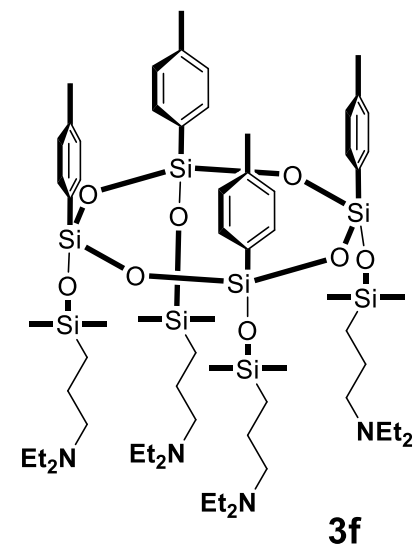

<sup>1</sup>H NMR  
(400 MHz, CDCl<sub>3</sub>)

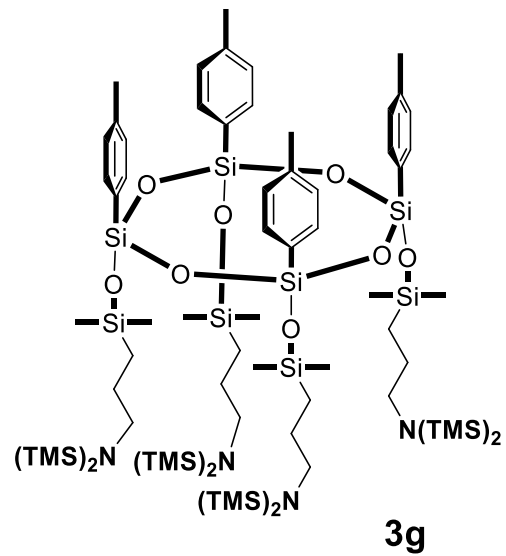

7.28  
7.21  
7.19  
6.92  
6.90

2.69  
2.29  
1.31  
0.49  
0.21  
0.07

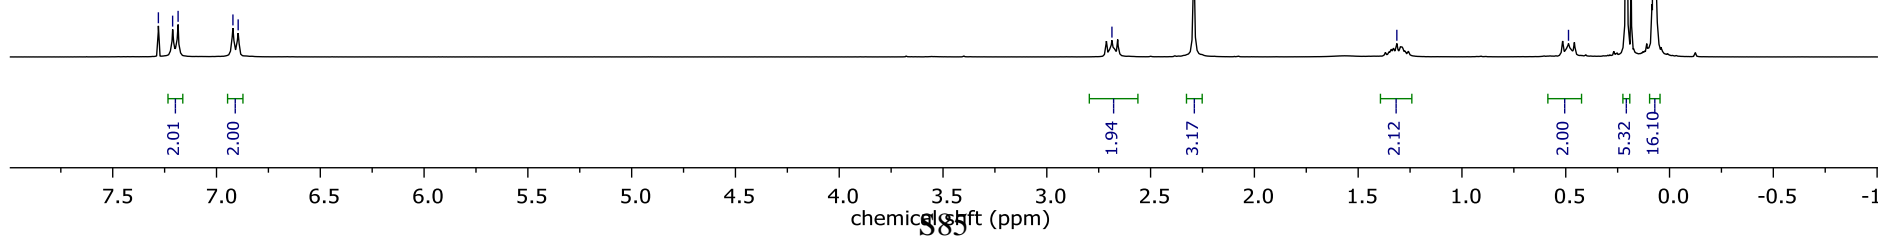

$^{13}\text{C}$  NMR  
(100 MHz,  $\text{CDCl}_3$ )

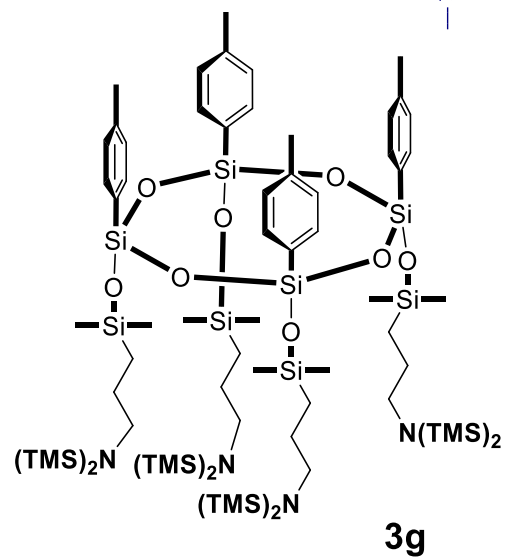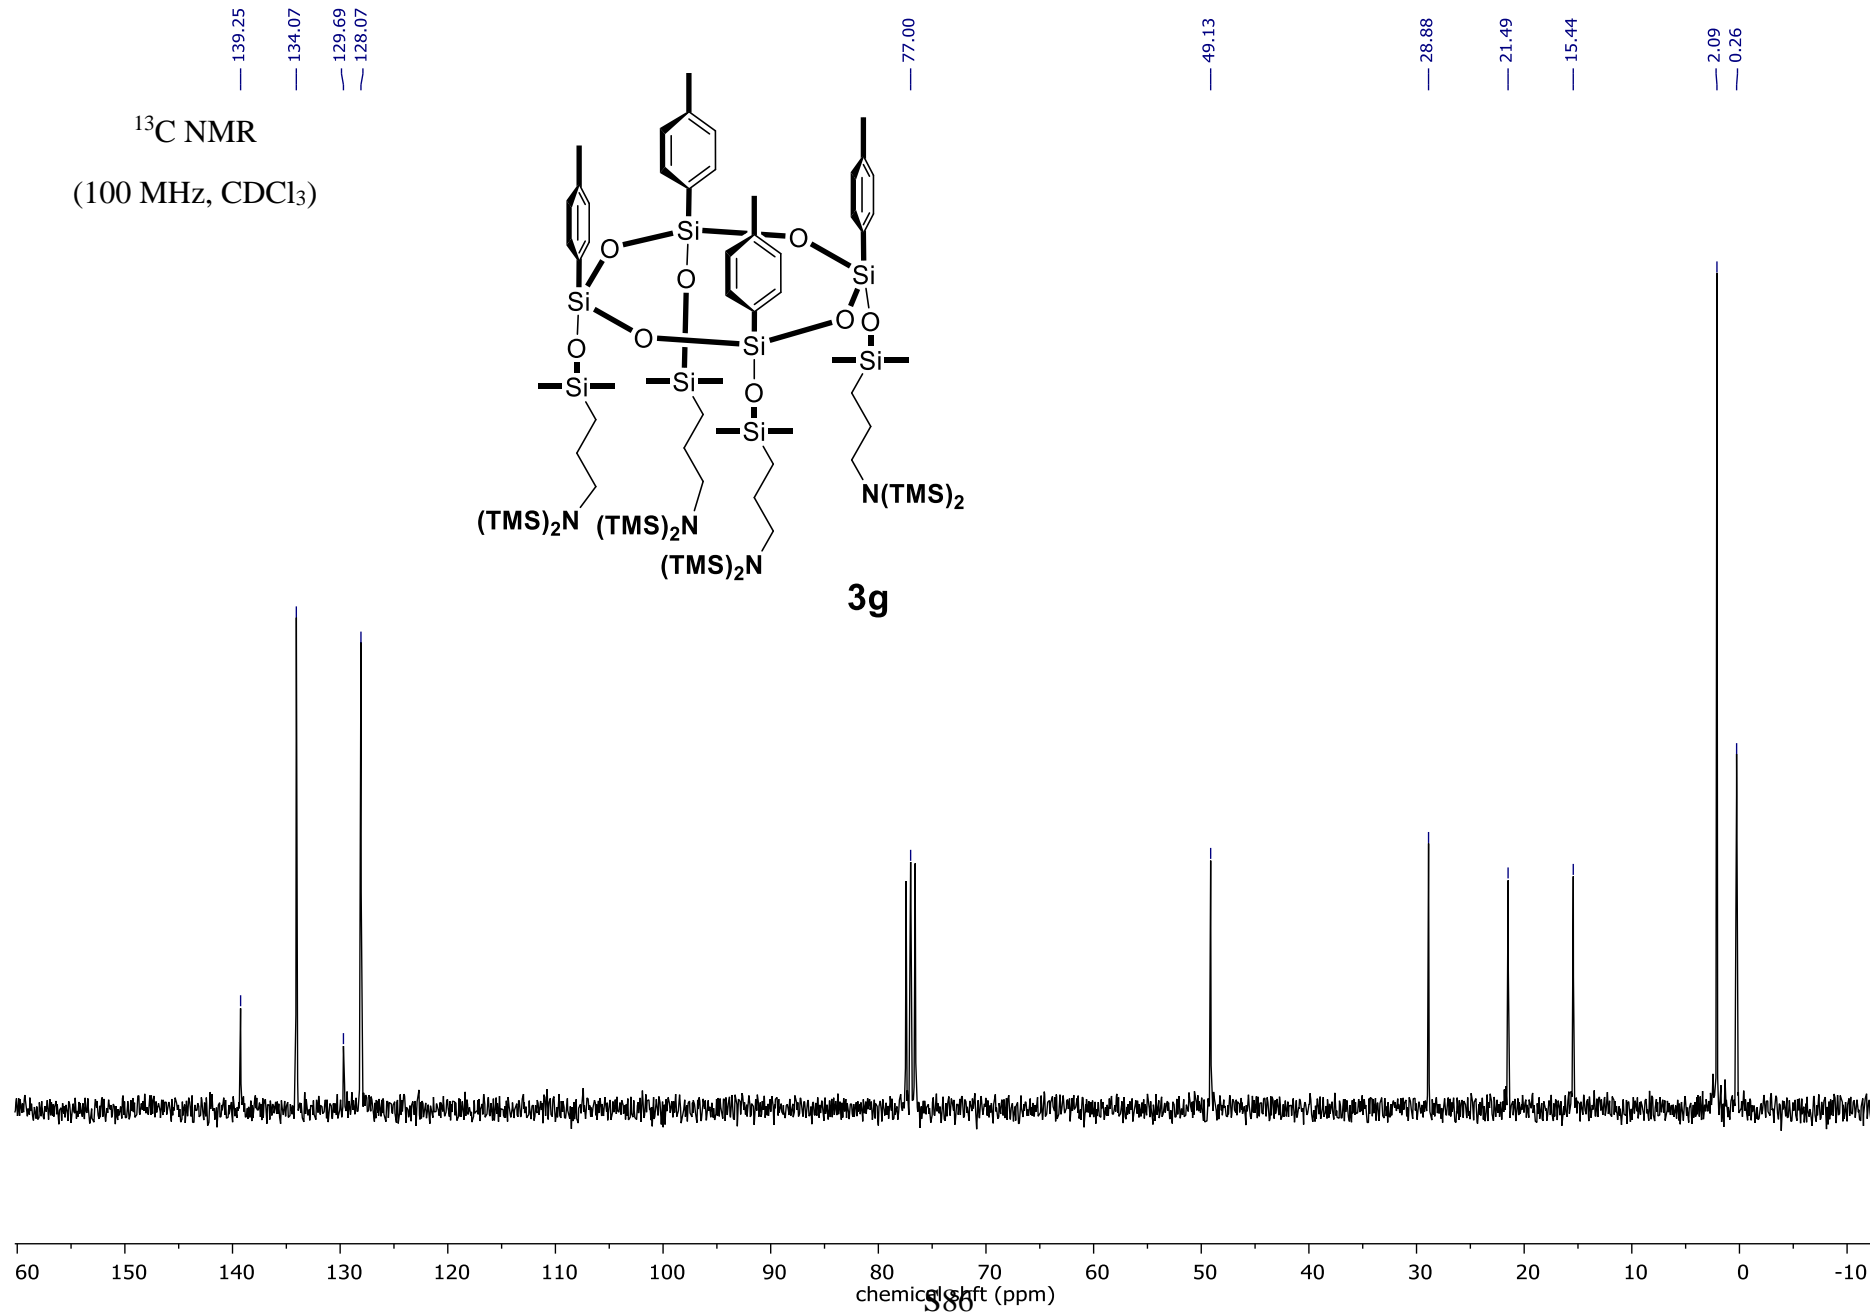

$^{29}\text{Si}$  NMR  
(80 MHz,  $\text{CDCl}_3$ )

10.10

5.07

-79.13

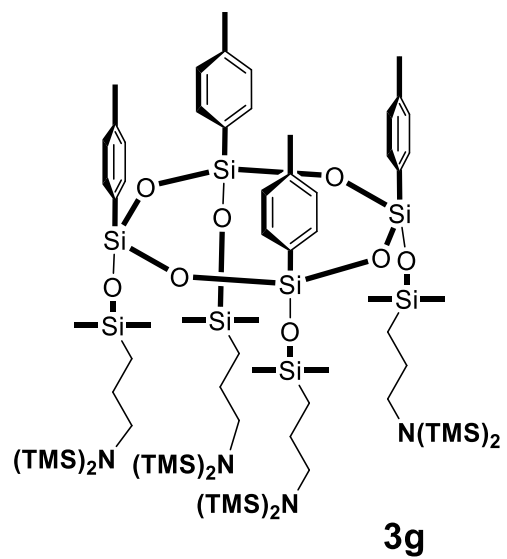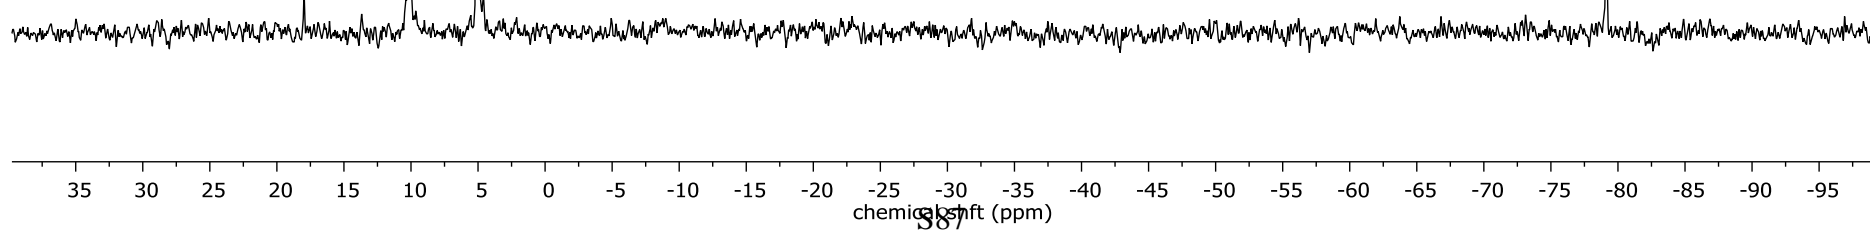

$^1\text{H}$ ,  $^{13}\text{C}$  edited-HSQC NMR,

( $^1\text{H}$ : 400 MHz,  $^{13}\text{C}$ : 100 MHz,

$\text{CDCl}_3$ )

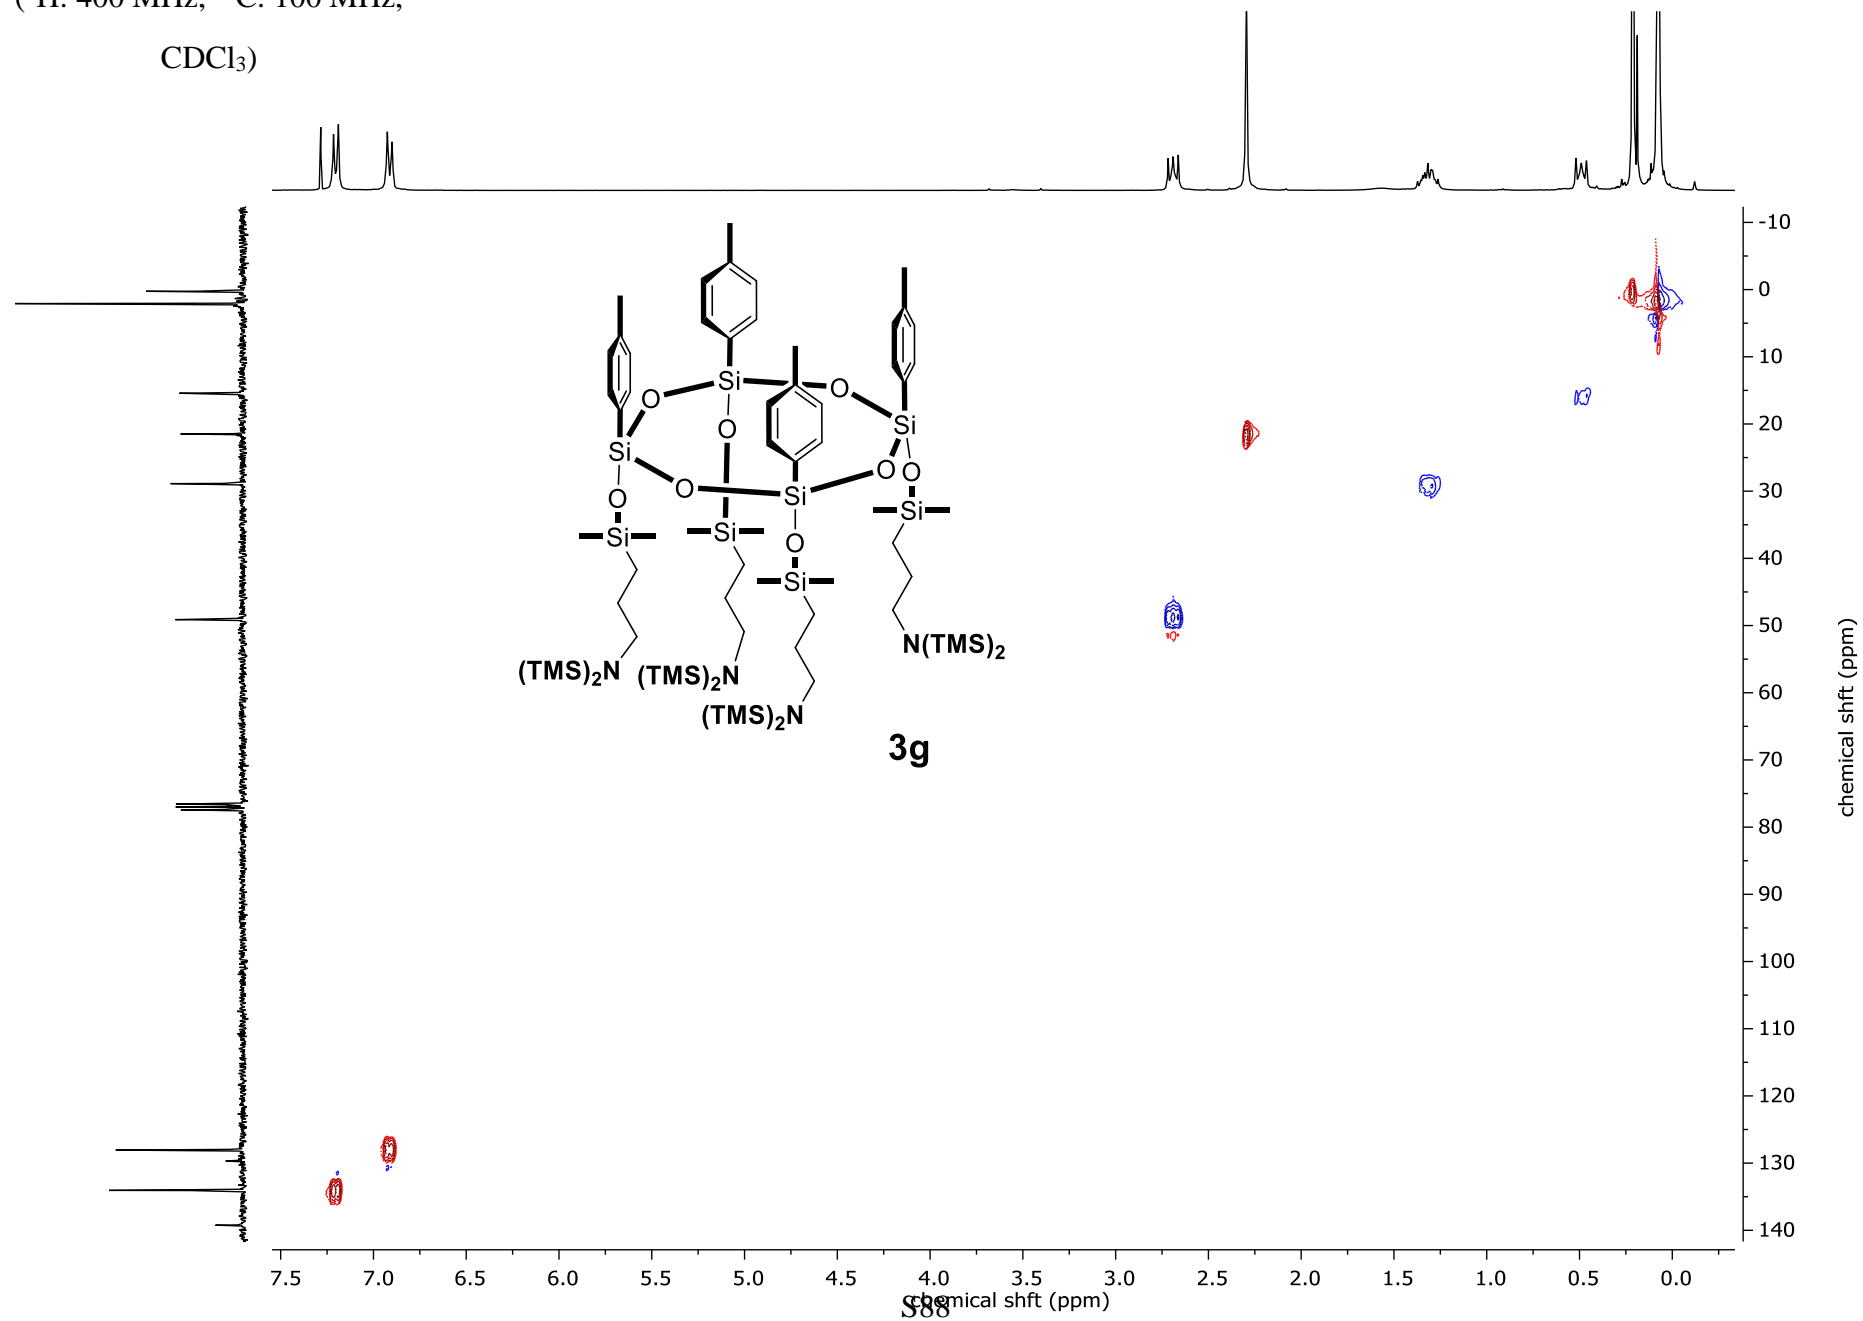



$^1\text{H}, ^{13}\text{C}$ -HMBC NMR,  
( $^1\text{H}$ : 400 MHz,  $^{13}\text{C}$ : 100 MHz,  
 $\text{CDCl}_3$ )

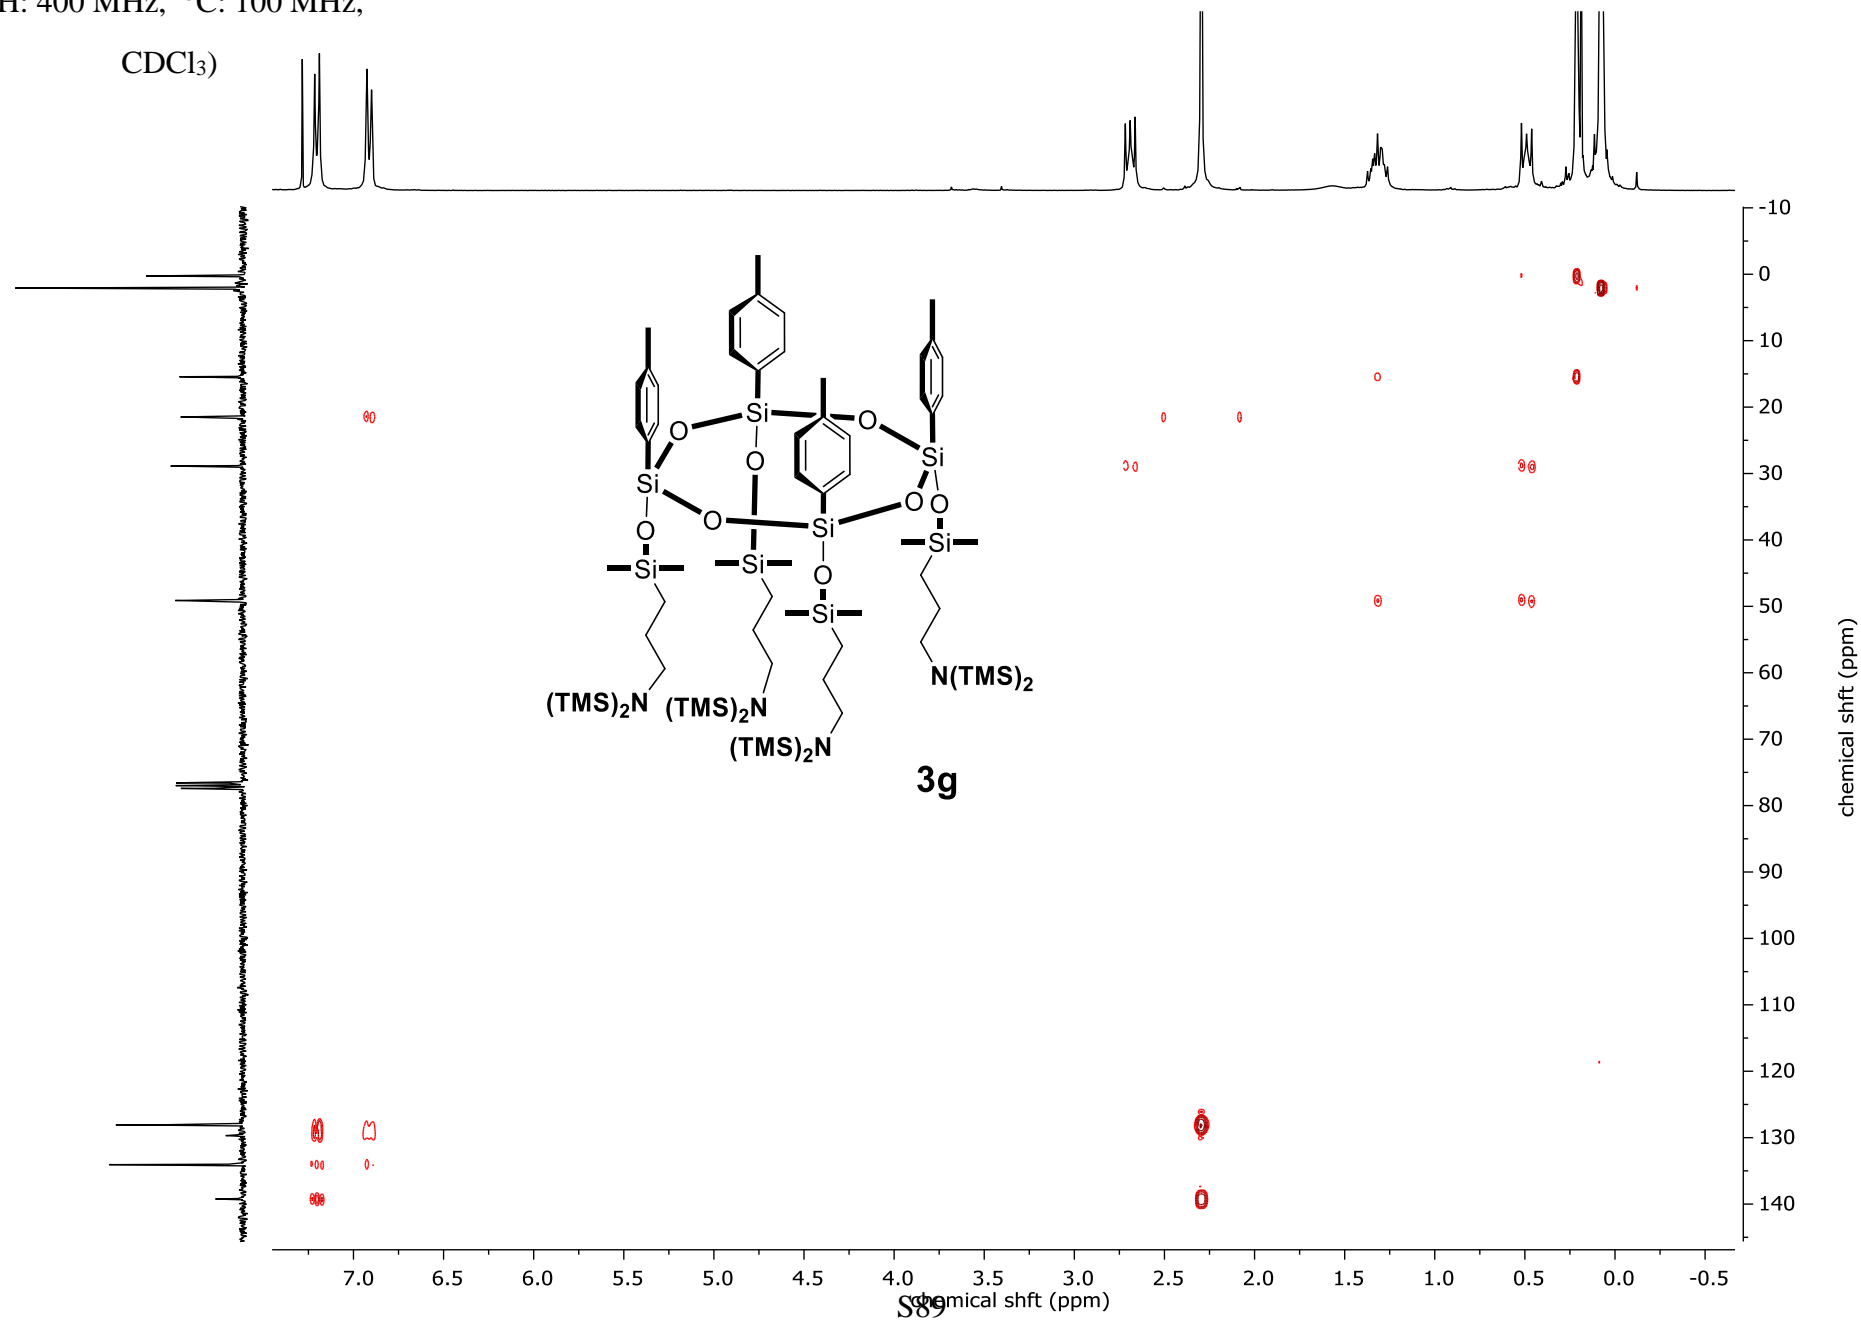

$^1\text{H}, ^{29}\text{Si}$ -HMBC NMR,  
( $^1\text{H}$ : 400 MHz,  $^{29}\text{Si}$ : 80 MHz,  
 $\text{CDCl}_3$ )

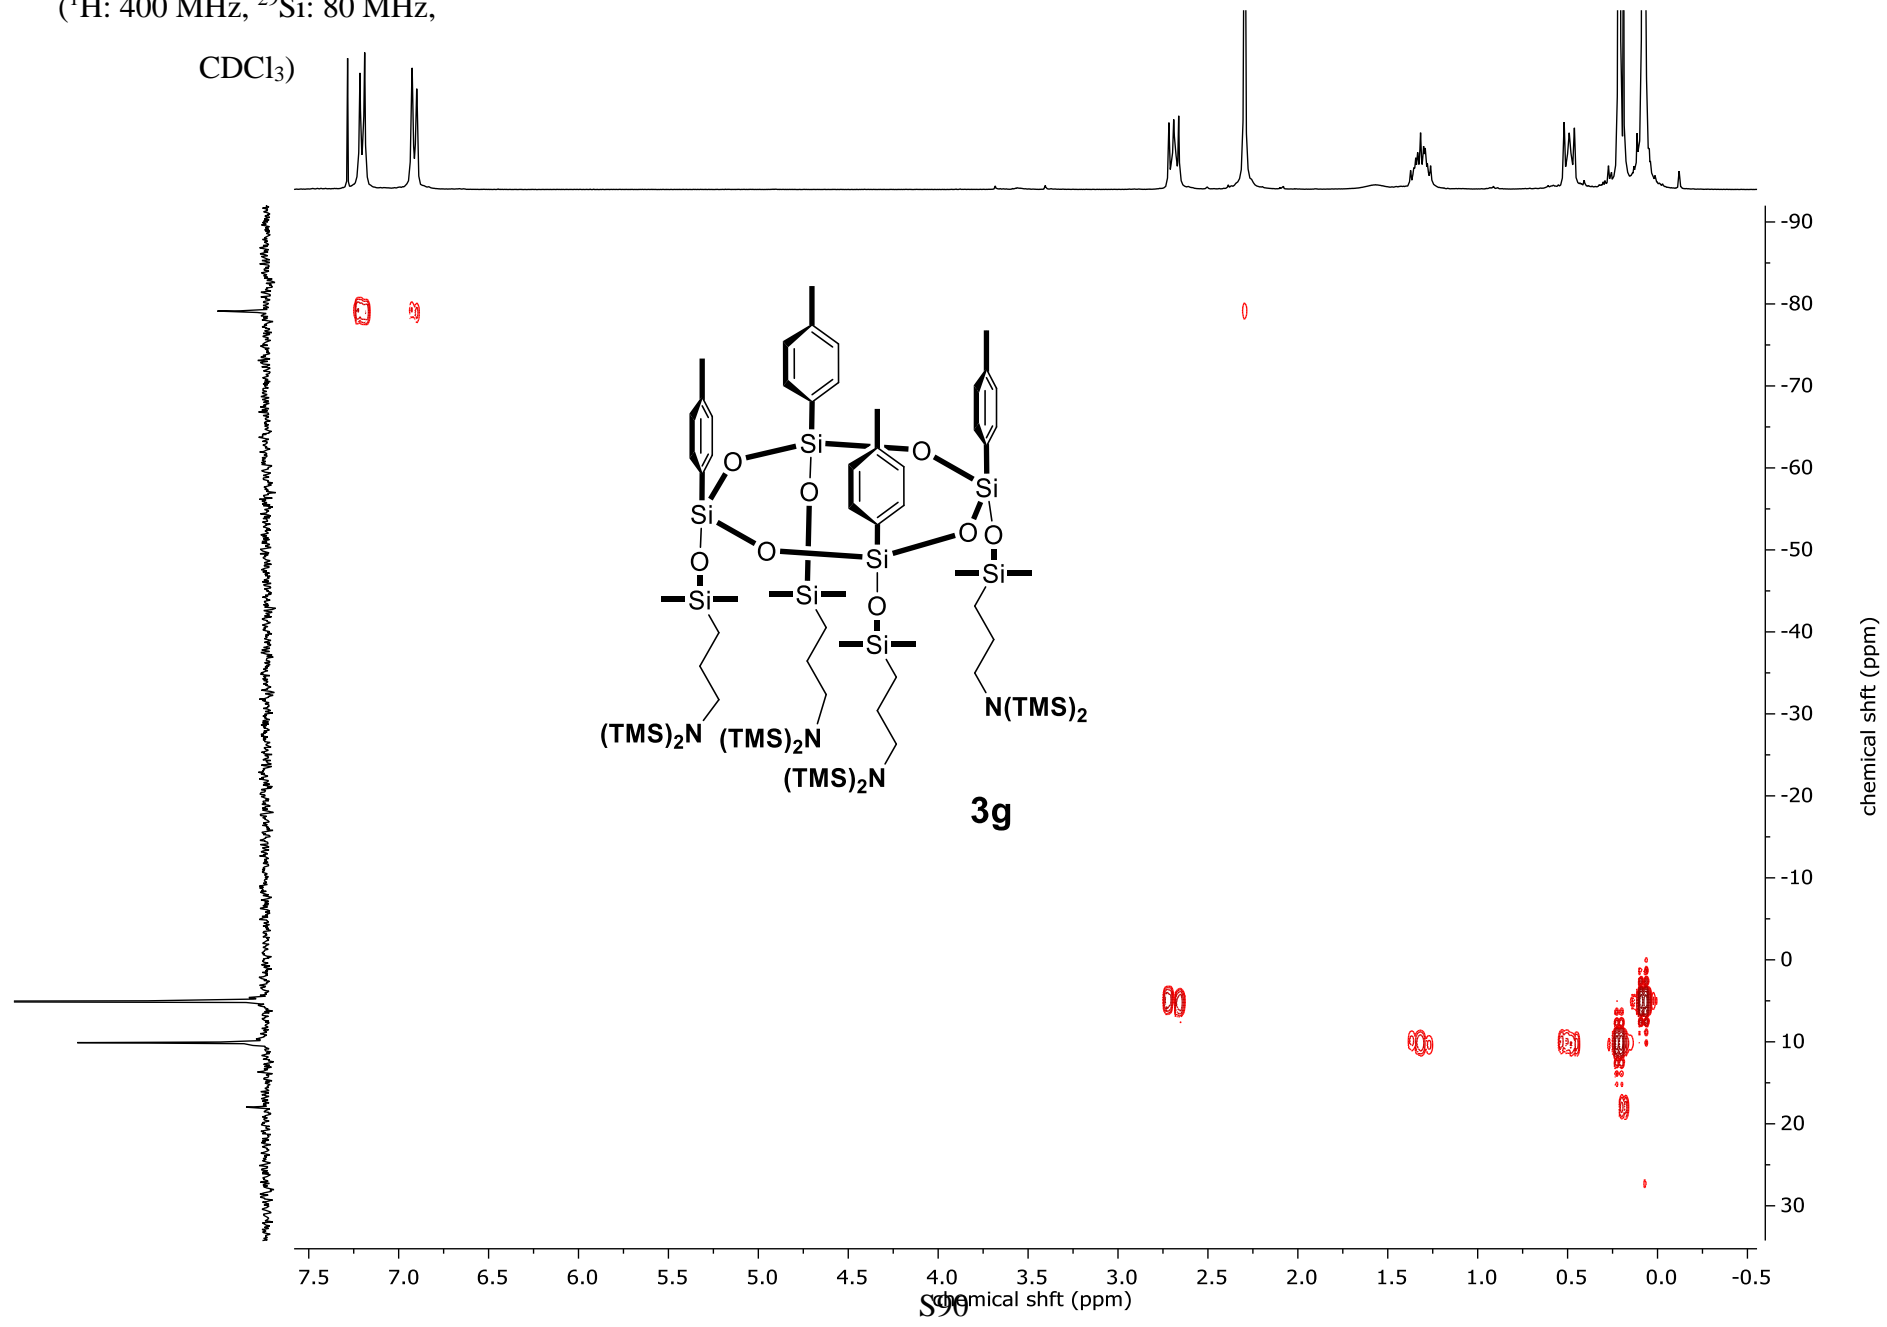

GPC

$M_n = 1820$  (pss)

$M_w = 1890$  (pss)

PDI = 1.04

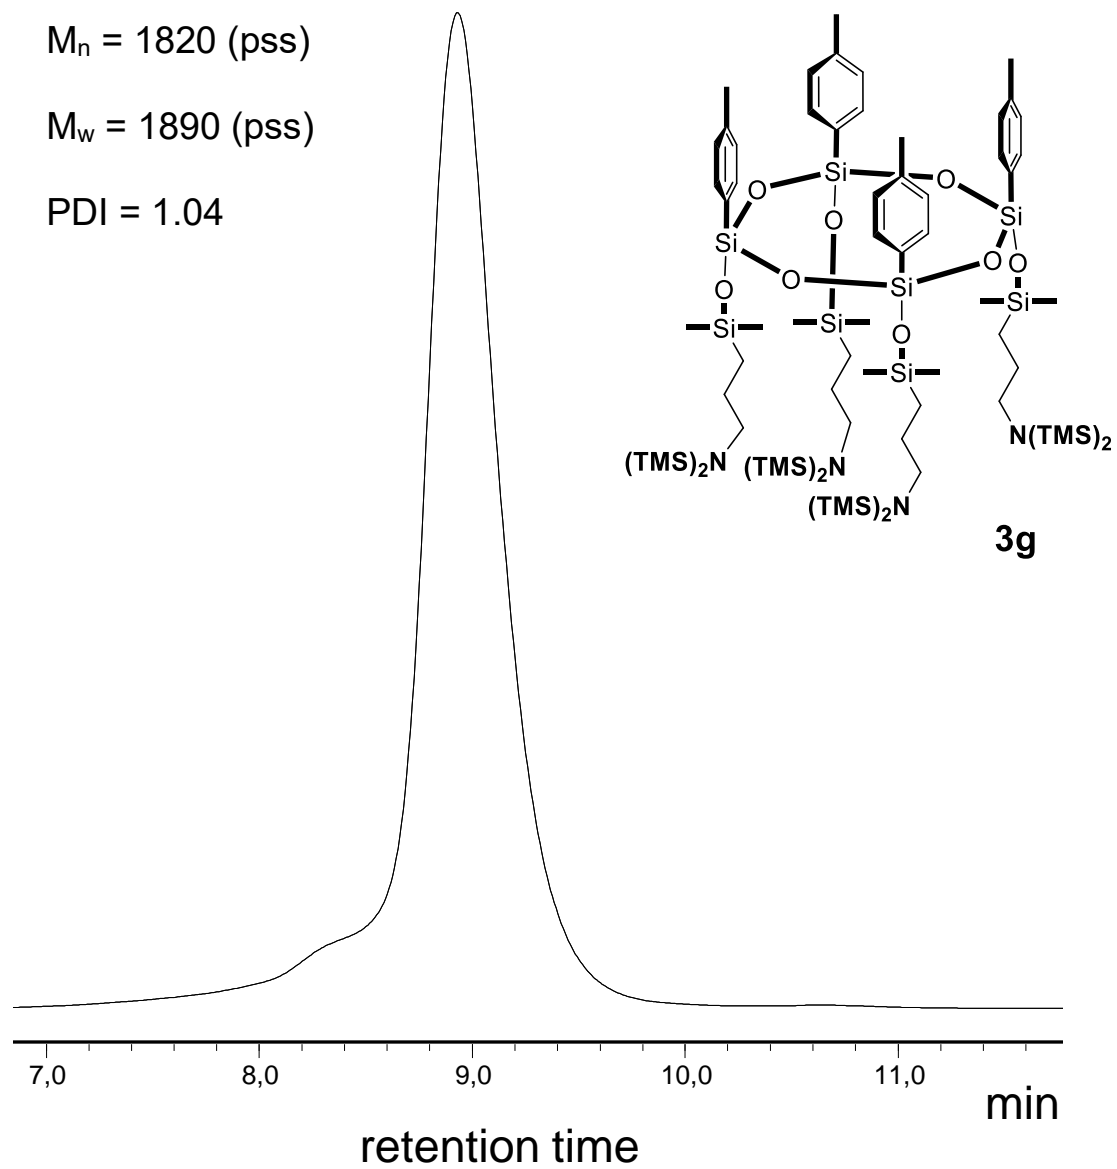

IR-spectrum

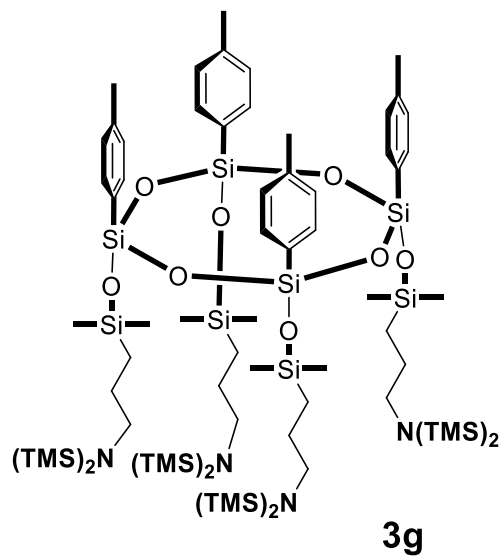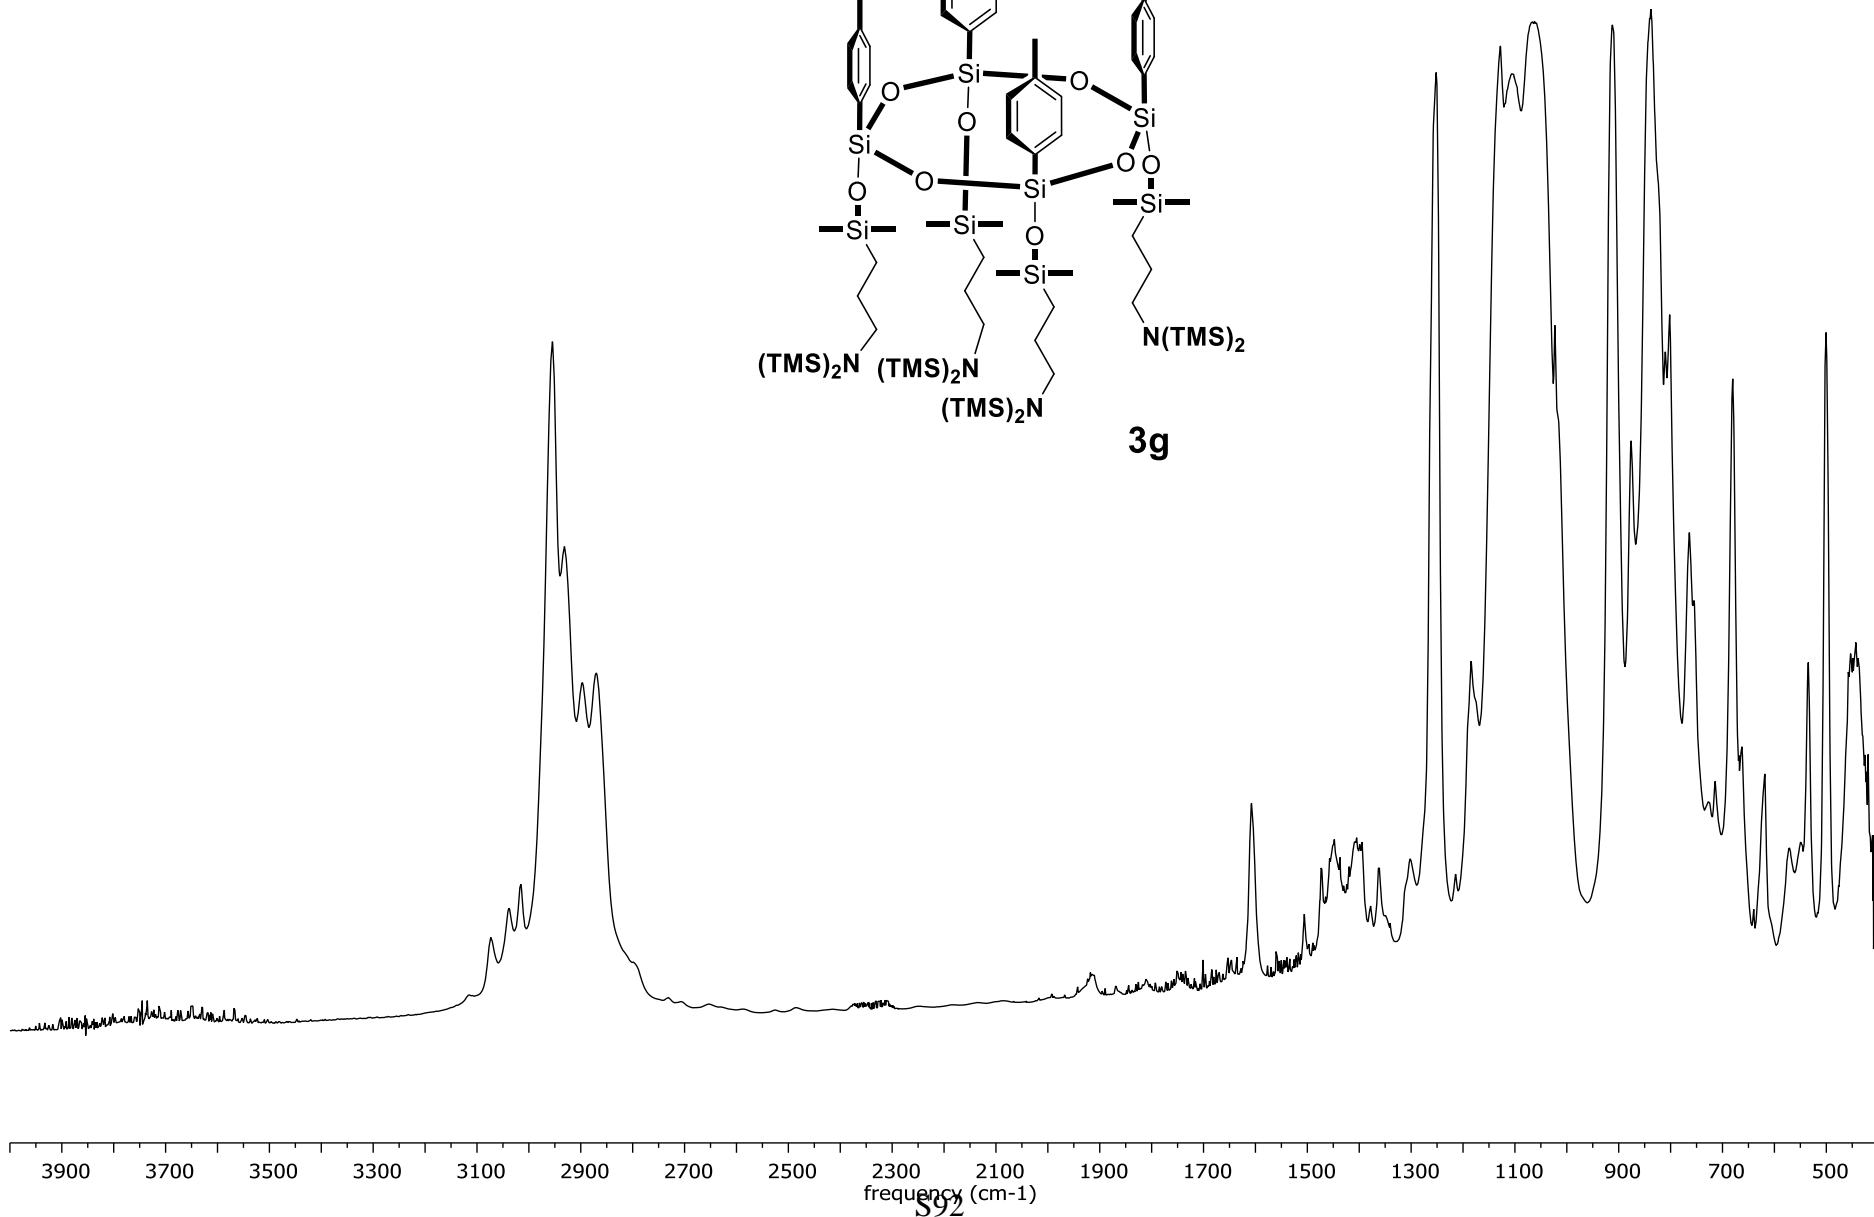

## S5. References

1. D. N. Kholodkov, A. A. Anisimov, S. N. Zimovets, A. A. Korlyukov, R. A. Novikov, A. V. Arzumanyan and A. M. Muzafarov, *Journal of Organometallic Chemistry*, 2020, **914**, 121223.
2. Y. S. Vysochinskaya, A. A. Anisimov, S. A. Milenin, A. A. Korlyukov, F. M. Dolgushin, E. G. Kononova, A. S. Peregudov, M. I. Buzin, O. I. Shchegolikhina and A. M. Muzafarov, *Mendeleev Communications*, 2018, **28**, 418-420.
3. O. V. Dolomanov, L. J. Bourhis, R. J. Gildea, J. A. K. Howard and H. Puschmann, *Journal of Applied Crystallography*, 2009, **42**, 339-341.
4. G. Sheldrick, *Acta Crystallographica Section A*, 2015, **71**, 3-8.
5. G. Sheldrick, *Acta Crystallographica Section C*, 2015, **71**, 3-8.
